# Supplementary material
Source: publisher figshare collection journal article supplement (https://acs.figshare.com/ndownloader/files/14199794)
Supplement: Supplementary file 1 [file 14199794]

# Supporting Information

## Enantioselective Radical Hydroacylation of Enals with $\alpha$ -Ketoacids Enabled by Photoredox/Amine Cocatalysis

Jia-Jia Zhao, Hong-Hao Zhang, Xu Shen and Shouyun Yu\*

State Key Laboratory of Analytical Chemistry for Life Science, Jiangsu Key Laboratory of Advanced Organic Materials, School of Chemistry and Chemical Engineering, Nanjing University, Nanjing 210023 (China)

E-mail: yushouyun@nju.edu.cn; Websites: <http://hysz.nju.edu.cn/yusy/>

### Table of Contents

|                                                                  |     |
|------------------------------------------------------------------|-----|
| 1. General method.....                                           | S2  |
| 2. Numberings and structures of catalysts.....                   | S2  |
| 3. Screening of catalysts and condition optimization for 3a..... | S4  |
| 4. General procedure for the synthesis of products 3.....        | S8  |
| 5. Mechanism studies.....                                        | S9  |
| 6. Characterization data of products 3.....                      | S12 |
| 7. Unsuccessful substrates.....                                  | S22 |
| 8. Copies of NMR spectra for products 3.....                     | S23 |
| 9. Chiral HPLC analyses of products 3.....                       | S44 |

## 1. General method

$^1\text{H}$  and  $^{13}\text{C}$  NMR spectra were measured respectively at 400 and 100 MHz, respectively. The solvent used for NMR spectroscopy was  $\text{CDCl}_3$ , using tetramethylsilane as the internal reference. HRMS (ESI) was determined by a micrOTOF-QII HRMS/MS instrument (Bruker). Enantiomeric ratios (*er*) were determined by chiral high-performance liquid chromatography (chiral HPLC). The chiral columns used for the determination of enantiomeric excesses by chiral HPLC were Chiralpak IC and IG-3 columns. Optical rotation values were measured with instruments operating at  $\lambda = 589$  nm, corresponding to the sodium D line at the temperatures indicated. Analytic grade solvents for the chromatography and commercially available reagents were used as received. The substrate  $\alpha$ -ketoacids **1** was prepared according to the literature.<sup>1</sup>

## 2. Numberings and structures of catalysts

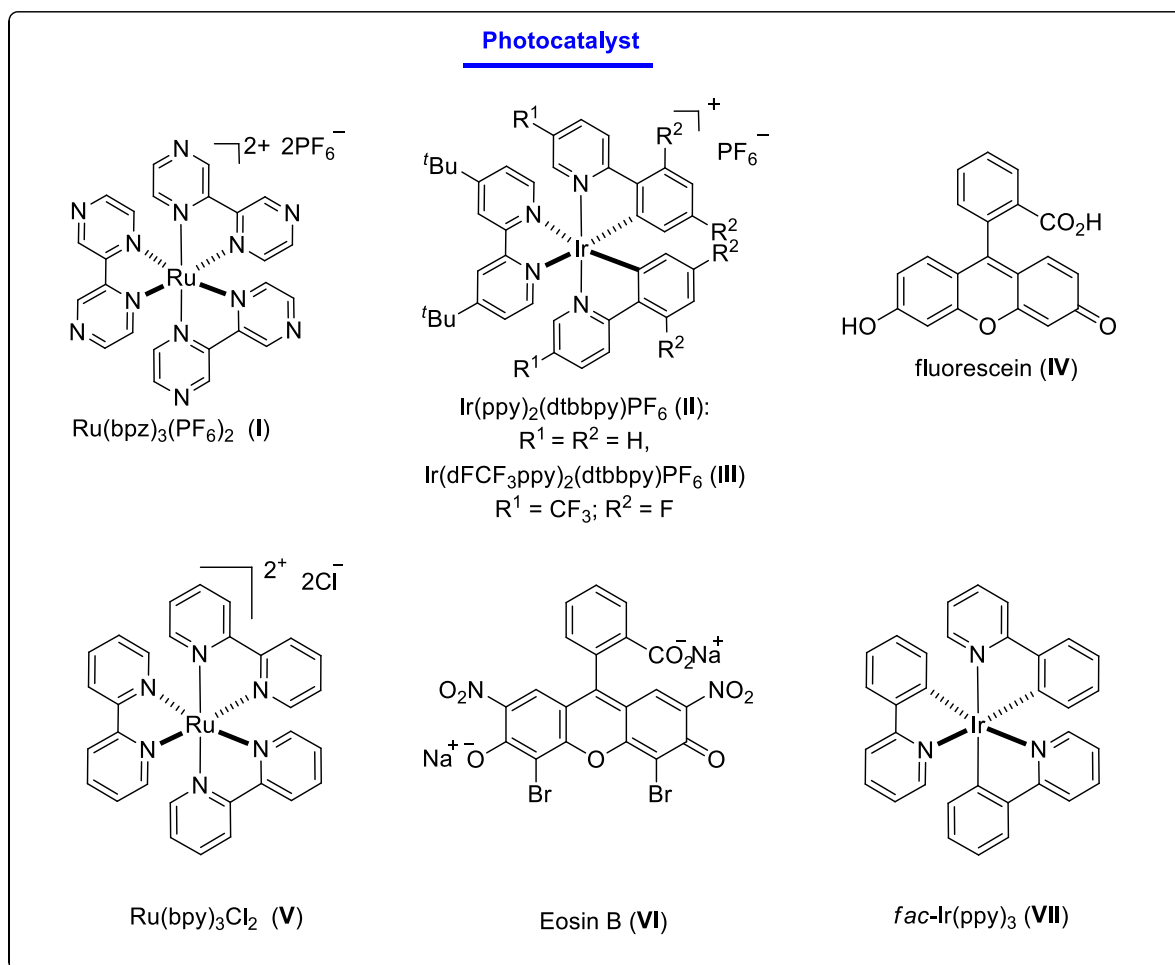

<sup>1</sup> Kuldeep, W.; Yang, C.; West, P. R.; Deming, K. C.; Sanjay, R. C.; Rajarathnam, E. R. *Synth. Commun.* **2008**, *38*, 4434-4444.

# Amine

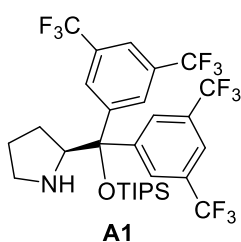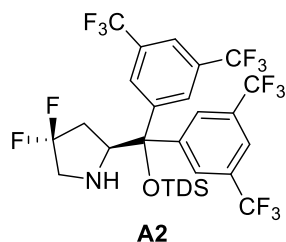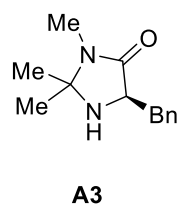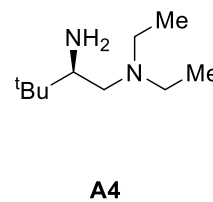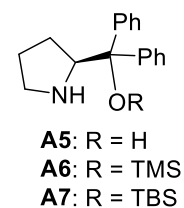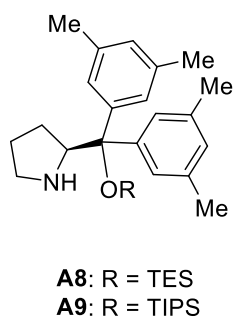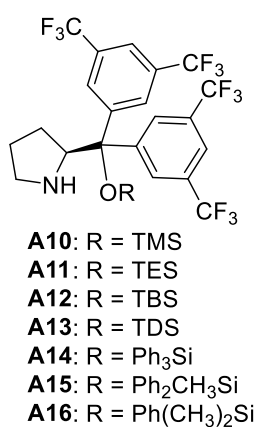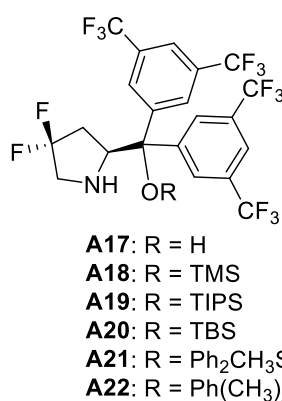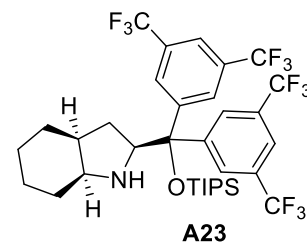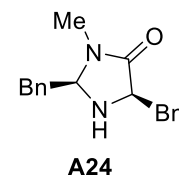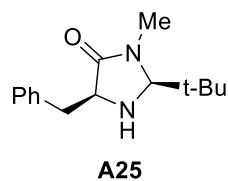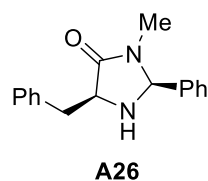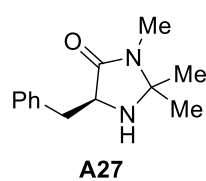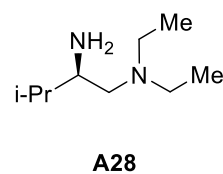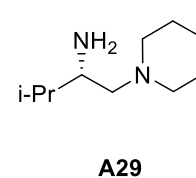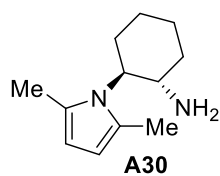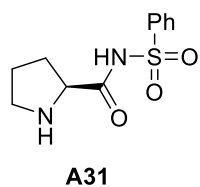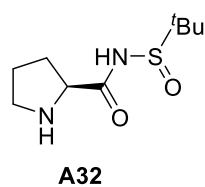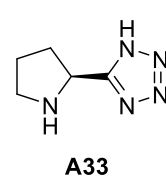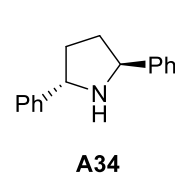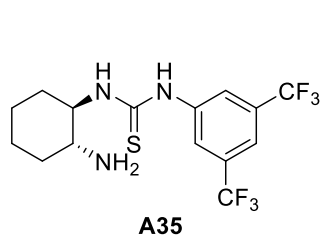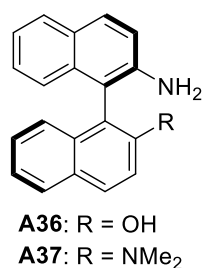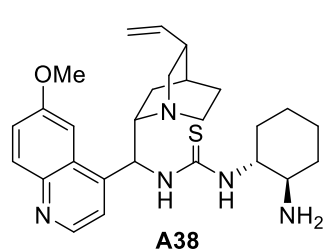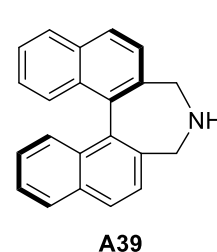

### 3. Screening of catalysts and condition optimization for 3a

**Table S1: Optimization of reaction conditions<sup>[a]</sup>**

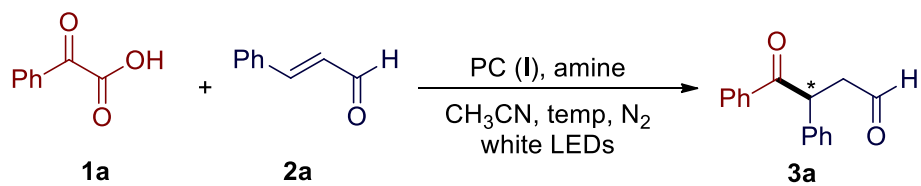

| entry | amine | yield/% <sup>[b]</sup> | ee/% <sup>[c]</sup> |
|-------|-------|------------------------|---------------------|
| 1     | A1    | 34                     | 58                  |
| 2     | A3    | 20                     | 0                   |
| 3     | A4    | 13                     | 26                  |
| 4     | A5    | trace                  | -                   |
| 5     | A6    | 6                      | 12                  |
| 6     | A7    | trace                  | -                   |
| 7     | A8    | 10                     | 22                  |
| 8     | A9    | 12                     | 2                   |
| 9     | A10   | 19                     | 38                  |
| 10    | A11   | 22                     | 46                  |
| 11    | A12   | 21                     | 58                  |
| 12    | A13   | 19                     | 58                  |
| 13    | A14   | 10                     | 60                  |
| 14    | A15   | 11                     | 58                  |
| 15    | A16   | 8                      | 48                  |



---

|                   |            |       |    |
|-------------------|------------|-------|----|
| 16                | <b>A24</b> | 14    | 10 |
| 17                | <b>A31</b> | trace | -  |
| 18                | <b>A32</b> | 14    | 2  |
| 19                | <b>A33</b> | 22    | 0  |
| 20                | <b>A34</b> | 33    | 24 |
| 21                | <b>A35</b> | 9     | 6  |
| 22                | <b>A36</b> | 11    | 6  |
| 23                | <b>A37</b> | 4     | 26 |
| 24                | <b>A38</b> | trace | -  |
| 25                | <b>A39</b> | 14    | 2  |
| 26 <sup>[d]</sup> | <b>A1</b>  | 20    | 66 |
| 27 <sup>[d]</sup> | <b>A2</b>  | 55    | 74 |
| 28 <sup>[d]</sup> | <b>A17</b> | 20    | 55 |
| 29 <sup>[d]</sup> | <b>A18</b> | 25    | 50 |
| 30 <sup>[d]</sup> | <b>A19</b> | 40    | 72 |
| 31 <sup>[d]</sup> | <b>A20</b> | 38    | 69 |
| 32 <sup>[d]</sup> | <b>A21</b> | 50    | 74 |
| 33 <sup>[d]</sup> | <b>A22</b> | 44    | 62 |
| 34 <sup>[d]</sup> | <b>A23</b> | 6     | 56 |
| 35 <sup>[d]</sup> | <b>A25</b> | 9     | 13 |

---

|                   |            |       |    |
|-------------------|------------|-------|----|
| 36 <sup>[d]</sup> | <b>A26</b> | 12    | 11 |
| 37 <sup>[d]</sup> | <b>A27</b> | 15    | 13 |
| 38 <sup>[d]</sup> | <b>A28</b> | 22    | 25 |
| 39 <sup>[d]</sup> | <b>A29</b> | 19    | 18 |
| 40 <sup>[d]</sup> | <b>A30</b> | trace | -  |

[a] Reaction conditions: a solution of **1a** (0.15 mmol), **2a** (0.10 mmol), amine (0.02 mmol, 20 mol%), and photocatalyst (0.002 mmol, 2 mol%) in the indicated solvent (1.0 mL) was irradiated by white LED strips for 24 h at ambient temperature. [b] Isolated yield. [c] The *ee* value was determined by HPLC. [d] The reaction temperature is 0 °C.

**Table S2: Optimization of reaction conditions<sup>[a]</sup>**

| 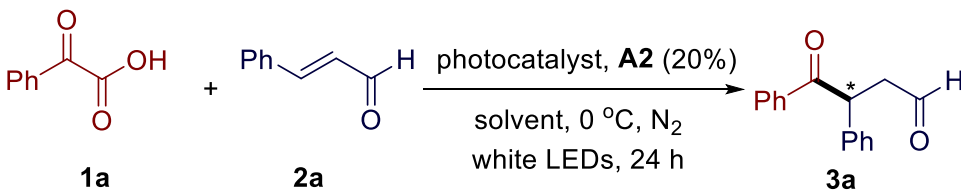 |                 |                           |              |                        |                              |
|-------------------------------------------------------------------------------------|-----------------|---------------------------|--------------|------------------------|------------------------------|
| entry                                                                               | PC (x %)        | solvent                   | <b>1a:2a</b> | yield/% <sup>[b]</sup> | <i>ee</i> / % <sup>[c]</sup> |
| 1                                                                                   | <b>I (2%)</b>   | CH <sub>3</sub> CN (1 mL) | 1.5:1        | 55                     | 74                           |
| 2                                                                                   | <b>II (2%)</b>  | CH <sub>3</sub> CN (1 mL) | 1.5:1        | N. R.                  | -                            |
| 3                                                                                   | <b>III (2%)</b> | CH <sub>3</sub> CN (1 mL) | 1.5:1        | 21                     | 72                           |
| 4                                                                                   | <b>IV (2%)</b>  | CH <sub>3</sub> CN (1 mL) | 1.5:1        | 18                     | 72                           |
| 5                                                                                   | <b>V (2%)</b>   | CH <sub>3</sub> CN (1 mL) | 1.5:1        | N. R.                  | -                            |
| 6                                                                                   | <b>VI (2%)</b>  | CH <sub>3</sub> CN (1 mL) | 1.5:1        | N. R.                  | -                            |
| 7                                                                                   | <b>VII (2%)</b> | CH <sub>3</sub> CN (1 mL) | 1.5:1        | N. R.                  | -                            |
| 8                                                                                   | <b>I (2%)</b>   | DCM (1 mL)                | 1.5:1        | 26                     | 39                           |
| 9                                                                                   | <b>I (2%)</b>   | PhCF <sub>3</sub> (1 mL)  | 1.5:1        | 15                     | 33                           |

|                   |                |                             |       |       |    |
|-------------------|----------------|-----------------------------|-------|-------|----|
| 10                | <b>I (2%)</b>  | 1,4-dioxane (1 mL)          | 1.5:1 | trace | -  |
| 11                | <b>I (2%)</b>  | EtOAc (1 mL)                | 1.5:1 | trace | -  |
| 12                | <b>I (2%)</b>  | DMSO (1 mL)                 | 1.5:1 | trace | -  |
| 13                | <b>I (2%)</b>  | DMF (1 mL)                  | 1.5:1 | N.R.  | -  |
| 14                | <b>I (2%)</b>  | MeOH (1 mL)                 | 1.5:1 | N.R.  | -  |
| 15                | <b>I (2%)</b>  | CH <sub>3</sub> CN (1 mL)   | 3:1   | 76    | 74 |
| 16                | <b>I (2%)</b>  | CH <sub>3</sub> CN (1 mL)   | 1:1   | 33    | 74 |
| 17                | <b>I (2%)</b>  | CH <sub>3</sub> CN (1 mL)   | 1:1.5 | 35    | 74 |
| 18                | <b>I (2%)</b>  | CH <sub>3</sub> CN (1 mL)   | 1:3   | 37    | 74 |
| 19                | <b>I (2%)</b>  | CH <sub>3</sub> CN (0.5 mL) | 3:1   | 72    | 70 |
| 20                | <b>I (2%)</b>  | CH <sub>3</sub> CN (2 mL)   | 3:1   | 68    | 74 |
| 21                | <b>I (2%)</b>  | CH <sub>3</sub> CN (3 mL)   | 3:1   | 60    | 74 |
| 22                | <b>I (2%)</b>  | CH <sub>3</sub> CN (4 mL)   | 3:1   | 56    | 74 |
| 23                | <b>I (1%)</b>  | CH <sub>3</sub> CN (1 mL)   | 3:1   | 61    | 74 |
| 24                | <b>I (5%)</b>  | CH <sub>3</sub> CN (1 mL)   | 3:1   | 91    | 74 |
| 25                | <b>I (10%)</b> | CH <sub>3</sub> CN (1 mL)   | 3:1   | 95    | 74 |
| 26 <sup>[d]</sup> | <b>I (5%)</b>  | CH <sub>3</sub> CN (1 mL)   | 3:1   | 48    | 78 |
| 27 <sup>[e]</sup> | <b>I (5%)</b>  | CH <sub>3</sub> CN (1 mL)   | 3:1   | 76    | 78 |
| 28 <sup>[f]</sup> | <b>I (5%)</b>  | CH <sub>3</sub> CN (1 mL)   | 3:1   | 90    | 80 |
| 29 <sup>[g]</sup> | <b>I (5%)</b>  | CH <sub>3</sub> CN (1 mL)   | 3:1   | N.R.  | -  |

|                   |               |                           |     |       |    |
|-------------------|---------------|---------------------------|-----|-------|----|
| 30                | -             | CH <sub>3</sub> CN (1 mL) | 3:1 | 13    | 80 |
| 31 <sup>[h]</sup> | <b>I (5%)</b> | CH <sub>3</sub> CN (1 mL) | 3:1 | trace | -  |
| 32 <sup>[i]</sup> | <b>I (5%)</b> | CH <sub>3</sub> CN (1 mL) | 3:1 | 88    | 78 |

[a] Unless otherwise indicated, the reaction was carried out at the 0.10 mmol scale and irradiated by white LED strips for 24h at 0 °C. [b] Isolated yield. [c] The *ee* value was determined by HPLC. [d] The reaction temperature is -20 °C, reaction time is 24 h. [e] The reaction temperature is -20 °C, reaction time is 48 h. [f] The reaction temperature is -20 °C, reaction time is 60 h. [g] in dark. [h] no amine. [i] The reaction takes place in air.

#### 4. General procedure for the synthesis of products 3

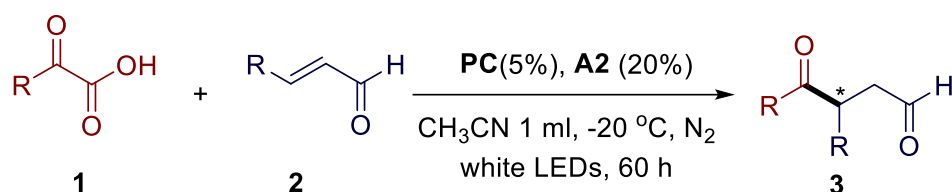

Acetonitrile (CH<sub>3</sub>CN) (1 mL) was added to the mixture of benzoylformic acid **1** (0.3 mmol), trans-cinnamaldehyde **2** (0.1 mmol), catalyst **A2** (0.02 mmol) and **PC** (0.005 mmol) under nitrogen. After being stirred at -20 °C in a refrigerator for 60 h with white LED strips, the reaction mixture was quenched with NaHCO<sub>3</sub> (aq.), extracted with ether, and purified through preparative thin layer chromatography to afford pure products **3**.

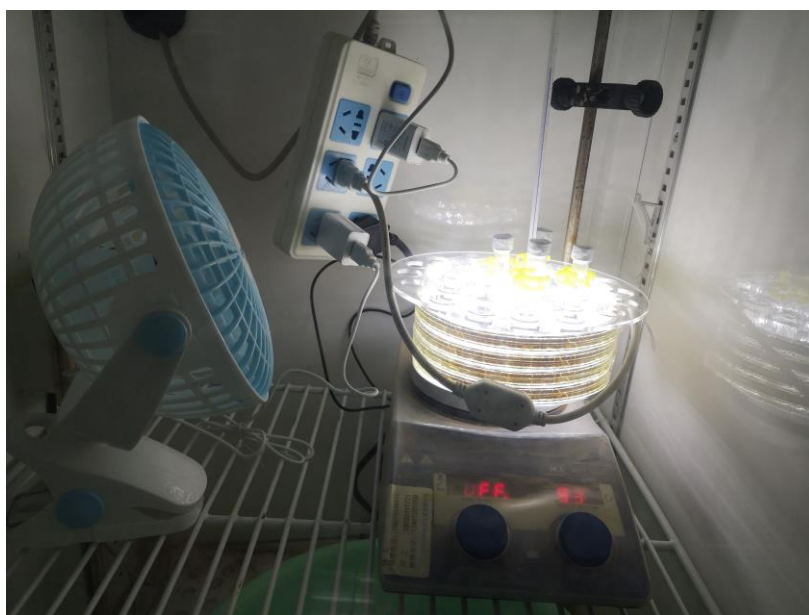

**Figure S1.** The reaction apparatus.

## 5. Mechanism Studies

### a) Quenching experiments and Stern-Volmer analysis.

A Hitachi F-7000 fluorescence spectrometer was used to record the emission intensities. All  $\text{Ru}(\text{bpz})_3(\text{PF}_6)_2$  solutions were excited at 443 nm and the emission intensity at 590 nm was observed.  $\text{CH}_3\text{CN}$  was degassed with a stream of Ar for 30 min. In a typical experiment, the emission spectrum of a  $5 \times 10^{-5}$  M solution of  $\text{Ru}(\text{bpz})_3(\text{PF}_6)_2$  in  $\text{CH}_3\text{CN}$  was collected. Then, appropriate amount of quencher was added to the measured solution in a quartz cuvette and the emission spectrum of the sample was collected.  $I_0$  and  $I$  represent the intensities of the emission in the absence and presence of the quencher at 590 nm.

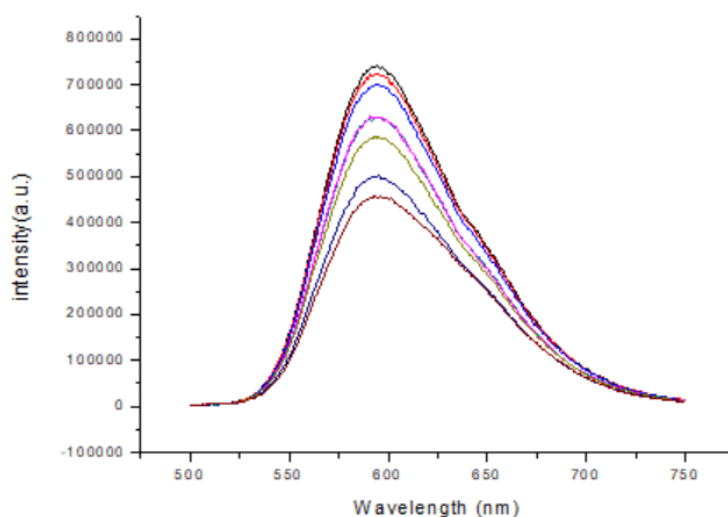

**Figure S2.** Emission spectra of  $5 \times 10^{-5}$  M  $\text{Ru}(\text{bpz})_3(\text{PF}_6)_2$  at  $\lambda_{\text{ex}} = 443\text{nm}$  showing the quenching effect of increasing of **1a**.

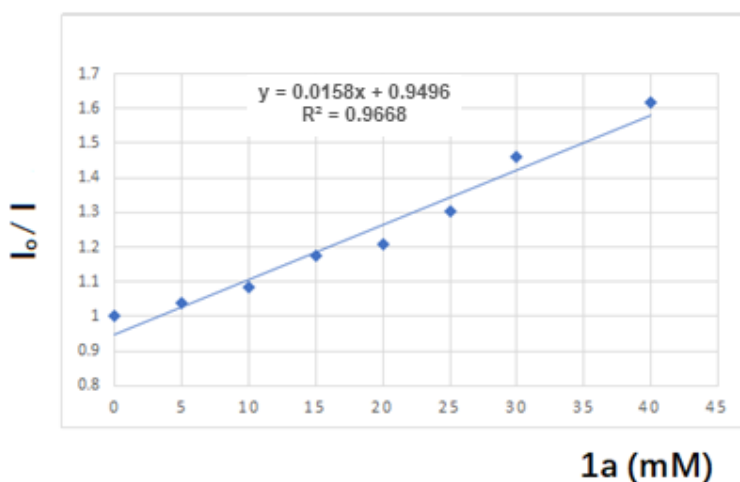

**Figure S3.** The linear relationship over the increasing concentration of **1a**.

## b) Quantum Yield Measurement

A ferrioxalate actinometry solution was prepared by following the Hammond variation of the Hatchard and Parker procedure outlined in Handbook of Photochemistry. Ferrioxalate actinometer solution measures the decomposition of ferric ions to ferrous ions, which are complexed by 1,10-phenanthroline and monitored by UV/Vis absorbance at 510 nm. The moles of iron-phenanthroline complex formed are related to moles of photons absorbed.

The solutions were prepared and stored in the dark (red light):

- 1) Potassium ferrioxalate solution: 294.8 mg of potassium ferrioxalate (commercially available from Alfa Aesar) and 139  $\mu$ L of sulfuric acid (96%) were added to a 50 mL volumetric flask, and filled to the mark with water (HPLC grade).
- 2) Phenanthroline solution: 0.2% by weight of 1,10-phenanthroline in water (100 mg in 50 mL volumetric flask).
- 3) Buffer solution: to a 50 mL volumetric flask 4.94 g of NaOAc and 0.5 mL of sulfuric acid (96%) were added and filled to the mark with water (HPLC grade).
- 4) Model reaction solution: phenylglyoxylic acid 1a (0.3 mmol), *trans*-cinnamaldehyde 2a (0.1 mmol), amine (20 mol %), and photocatalyst (5 mol %) in the acetonitrile (1.0 mL) was irradiated by white LED strips at  $-20\text{ }^{\circ}\text{C}$ .

The actinometry measurements were done as follows:

- 1) 1 mL of the actinometer solution was added to a quartz cuvette ( $l = 10\text{ mm}$ ). The cuvette was placed along with a sample solution (1 mL in a similar cuvette) whose quantum yield has to be measured (our model reaction). The sample and actinometry solutions (placed 10 cm away from the lamp) were irradiated with 13 W white LED strips for specified time intervals (5, 6, 7, 8) min.
- 2) After irradiation all the actinometer solution was removed and placed in a 25 mL volumetric flask. 0.5 mL of 1,10-phenanthroline solution and 2 mL of buffer solution was added to this flask and filled to the mark with water (HPLC grade).
- 3) The UV-Vis spectra of actinometry samples were recorded for each time interval. The absorbance of the actinometry solution was monitored at 510 nm.

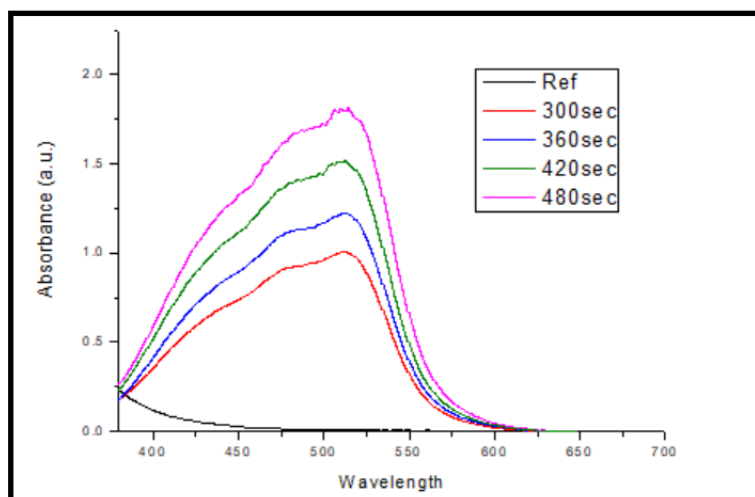

**Figure S4.** The absorbance of the actinometry solution was monitored at 510 nm.

4) The moles of  $\text{Fe}^{2+}$  formed for each sample is determined using Beers' Law:

$$\text{moles Fe}^{2+} = \frac{V_1 \times V_3 \times \Delta A(510 \text{ nm})}{10^3 \times V_2 \times l \times \varepsilon(510 \text{ nm})}$$

where  $V_1$  is the irradiated volume (1 mL),  $V_2$  is the aliquot of the irradiated solution taken for the determination of the ferrous ions (1 mL),  $V_3$  is the final volume after complexation with phenanthroline (25 mL),  $l$  is the optical path-length of the irradiation cell (1 cm),  $\Delta A(510 \text{ nm})$  the optical difference in absorbance between the irradiated solution and that taken in the dark,  $\varepsilon(510 \text{ nm})$  is that of the complex  $\text{Fe}(\text{phen})_3^{2+}$  ( $11100 \text{ L mol}^{-1} \text{ cm}^{-1}$ ).

5) The moles of  $\text{Fe}^{2+}$  formed ( $N$ ) are plotted as a function of time ( $t$ ). The slope is a product of the photon flux ( $F$ ) and the quantum yield for  $\text{Fe}^{2+}$  ( $\phi_{\text{Fe}^{2+}} = 1.13$ ) at 400 nm as,  $F = N / \phi_{\text{Fe}^{2+}} t$ . The  $F$  was determined to be  $1.77 \times 10^{-9} \text{ einstein s}^{-1}$ .

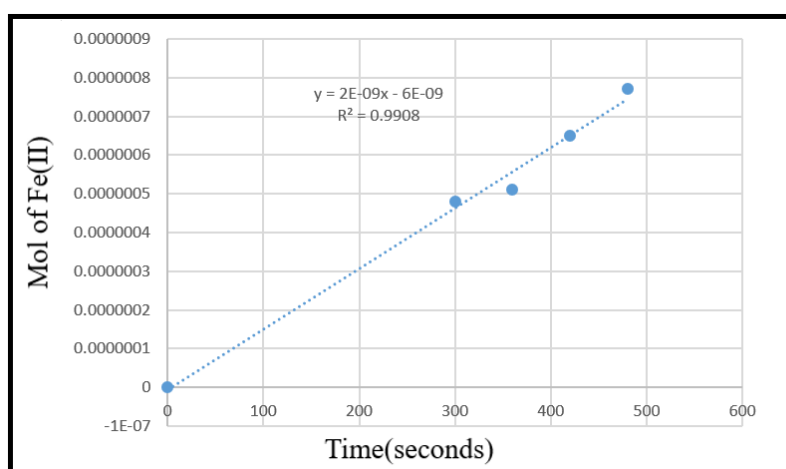

**Figure S5.** The plot of the moles of  $\text{Fe}^{2+}$  as a function of time ( $t$ ).

6) The moles of products formed for the reaction of interest (done by irradiating the sample alongside the actinometer solution) are described above. The moles of products formed were determined by column chromatography (The product will break down by GC measurement (FID detector)). The number of moles of product per unit time is related to the number of photons absorbed. The slope yields the quantum yield ( $\Phi$ ) of the photoreaction, 0.23.

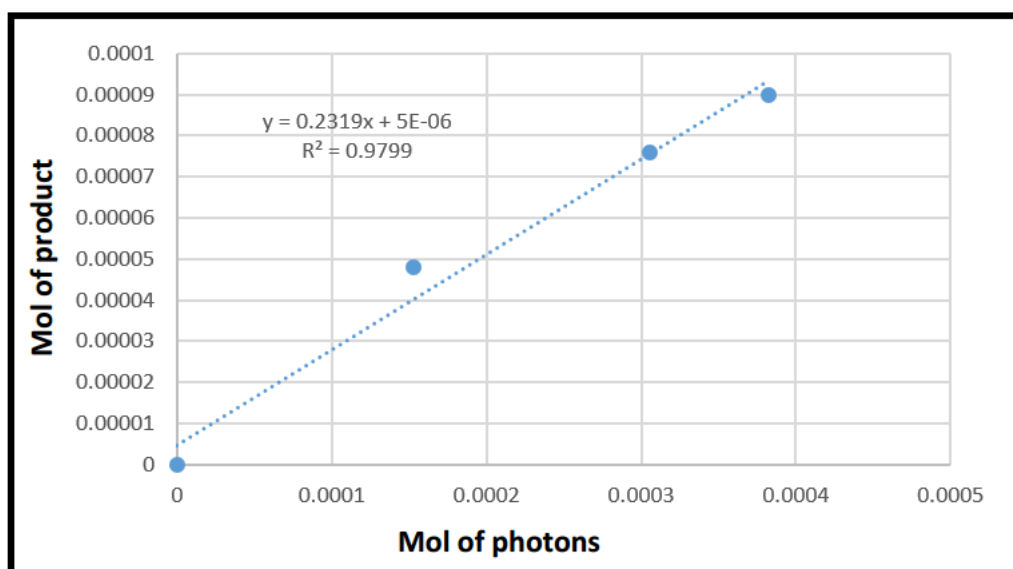

**Figure S6.** The plot of the number of moles of product per unit time as a function of the number of photons absorbed.

The procedure was repeated a second time to provide a similar value, a quantum yield ( $\Phi$ ) of 0.21.

The quantum yield ( $\Phi$ ) was determined to **0.22** (the average of two parallel experiments).

## 6. Characterization data of products 3

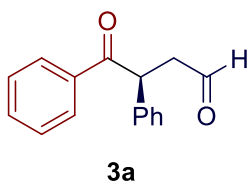

**(S)-4-oxo-3,4-diphenylbutanal (3a):** Preparative thin layer chromatography, petroleum ether/ethyl acetate = 10/1; reaction time = 60 h; yield: 90% (21.4 mg); white solid; m.p. 82-83 °C;  $[\alpha]_D^{20} = +155.5$  (c 2.08, CHCl<sub>3</sub>);  $[\alpha]_D^{26} = +120.1$  (c 1.15, CH<sub>2</sub>Cl<sub>2</sub>); <sup>1</sup>H NMR (400 MHz, CDCl<sub>3</sub>)  $\delta$  9.80 (s, 1H), 7.96 (dd,  $J = 5.2, 3.3$  Hz, 2H), 7.52 – 7.44 (m, 1H), 7.37 (dd,  $J = 10.5, 4.7$  Hz, 2H), 7.32 – 7.25 (m, 4H), 7.24 – 7.18 (m, 1H), 5.13 (dd,  $J = 9.6, 4.2$  Hz, 1H), 3.61 (dd,  $J = 18.5, 9.7$  Hz, 1H), 2.83



(dd,  $J = 18.6, 4.2$  Hz, 1H);  $^{13}\text{C}$  NMR (100 MHz,  $\text{CDCl}_3$ )  $\delta$  200.1, 198.2, 138.3, 136.0, 133.1, 129.3, 128.9, 128.6, 128.1, 127.5, 48.3, 47.6; ESI FTMS exact mass calcd for  $(\text{C}_{16}\text{H}_{14}\text{O}_2+\text{H})^+$  requires  $m/z$  239.1072, found  $m/z$  239.1073; Enantiomeric excess: 80%, determined by HPLC (Daicel Chiralpak IC, hexane/ isopropanol = 90/10, flow rate 1.0 mL/min,  $T = 25^\circ\text{C}$ , 220 nm):  $t_R = 17.276$  min (major),  $t_R = 12.359$  min (minor).

The absolute configuration of product **3a** was determined to be *S* by comparing its optical rotation  $[\alpha]_D^{26} = +120.1$  with that of the same known compound  $[\alpha]_D^{26} = +52.9$ .<sup>2</sup> The absolute configurations of other products were assigned by analogy.

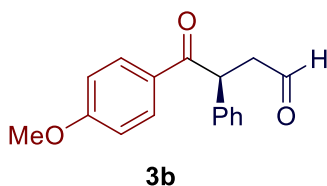

**(S)-4-(4-methoxyphenyl)-4-oxo-3-phenylbutanal (3b):** Preparative thin layer chromatography, petroleum ether/ethyl acetate = 10/1; reaction time = 60 h; yield: 93% (24.9mg); pale yellow oil;  $[\alpha]_D^{20} = +145.8$  (c 1.24,  $\text{CHCl}_3$ );  $^1\text{H}$  NMR (400 MHz,  $\text{CDCl}_3$ )  $\delta$  9.81 (s, 1H), 7.99 – 7.92 (m, 2H), 7.32 – 7.25 (m, 4H), 7.24 – 7.19 (m, 1H), 6.89 – 6.83 (m, 2H), 5.09 (dd,  $J = 9.5, 4.3$  Hz, 1H), 3.81 (s, 3H), 3.58 (dd,  $J = 18.4, 9.5$  Hz, 1H), 2.81 (dd,  $J = 18.5, 4.3$  Hz, 1H);  $^{13}\text{C}$  NMR (100 MHz,  $\text{CDCl}_3$ )  $\delta$  200.2, 196.6, 163.5, 138.8, 131.3, 129.2, 128.9, 128.0, 127.4, 113.7, 55.4, 48.3, 47.4; ESI FTMS exact mass calcd for  $(\text{C}_{17}\text{H}_{16}\text{O}_3+\text{H})^+$  requires  $m/z$  269.1177, found  $m/z$  269.1173; Enantiomeric excess: 68%, determined by HPLC (Daicel Chiralpak IC, hexane/ isopropanol = 90/10, flow rate 1.0 mL/min,  $T = 25^\circ\text{C}$ , 220 nm):  $t_R = 31.651$  min (major),  $t_R = 26.172$  min (minor).

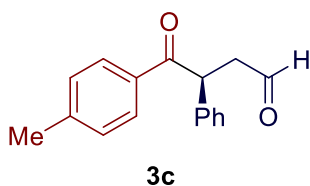

**(S)-4-oxo-3-phenyl-4-(p-tolyl)butanal (3c):** Preparative thin layer chromatography, petroleum ether/ethyl acetate = 10/1; reaction time = 60 h; yield: 92% (23.4 mg); pale yellow oil;  $[\alpha]_D^{20} = +141.7$  (c 1.16,  $\text{CHCl}_3$ );  $^1\text{H}$  NMR (400 MHz,  $\text{CDCl}_3$ )  $\delta$  9.81 (s, 1H), 7.87 (d,  $J = 8.3$  Hz, 2H), 7.32 – 7.24 (m, 4H), 7.23 – 7.19 (m, 1H), 7.17 (d,  $J = 8.0$  Hz, 2H), 5.11 (dd,  $J = 9.5, 4.3$  Hz, 1H), 3.59 (dd,  $J = 18.5, 9.6$  Hz, 1H), 2.82 (dd,  $J = 18.5, 4.3$  Hz, 1H), 2.34 (s, 3H);  $^{13}\text{C}$  NMR (100 MHz,  $\text{CDCl}_3$ )  $\delta$

<sup>2</sup>Goti, G.; Bieszczad, B.; Vega-Peñaloza, A.; Melchiorre, P. *Angew. Chem. Int. Ed.* 10.1002/anie.201810798.

200.1, 197.7, 143.9, 138.5, 133.4, 129.2, 129.1, 128.1, 127.4, 48.2, 47.5, 21.6; ESI FTMS exact mass calcd for  $(C_{17}H_{16}O_2+H)^+$  requires  $m/z$  253.1229, found  $m/z$  253.1223; Enantiomeric excess: 68%, determined by HPLC (Daicel Chiralpak IC, hexane/ isopropanol = 90/10, flow rate 1.0 mL/min, T = 25 °C, 220 nm):  $t_R$  = 20.145 min (major),  $t_R$  = 15.144 min (minor).

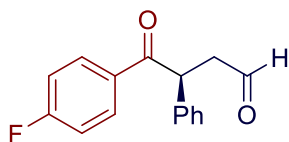

**3d**

**(S)-4-(4-fluorophenyl)-4-oxo-3-phenylbutanal (3d):** Preparative thin layer chromatography, petroleum ether/ethyl acetate = 10/1; reaction time = 60 h; yield: 91% (23.3 mg); pale yellow solid; m.p. 95-96 °C;  $[\alpha]_D^{20}$  = +135.5 (c 1.16,  $CHCl_3$ );  $^1H$  NMR (400 MHz,  $CDCl_3$ )  $\delta$  9.81 (s, 1H), 8.02 – 7.95 (m, 2H), 7.34 – 7.28 (m, 2H), 7.26 – 7.19 (m, 3H), 7.09 – 7.01 (m, 2H), 5.07 (dd,  $J$  = 9.7, 4.1 Hz, 1H), 3.62 (dd,  $J$  = 18.7, 9.8 Hz, 1H), 2.83 (dd,  $J$  = 18.7, 4.1 Hz, 1H);  $^{13}C$  NMR (100 MHz,  $CDCl_3$ )  $\delta$  199.9, 196.6, 165.6 ( $J$  = 255.1 Hz), 138.1, 132.4, 131.6 ( $J$  = 9.3 Hz), 129.4, 128.0, 127.6, 115.7 ( $J$  = 21.9 Hz), 48.3, 47.6; ESI FTMS exact mass calcd for  $(C_{16}H_{13}FO_2+H)^+$  requires  $m/z$  257.0978, found  $m/z$  257.0977; Enantiomeric excess: 74%, determined by HPLC (Daicel Chiralpak IC, hexane/ isopropanol = 90/10, flow rate 1.0 mL/min, T = 25 °C, 220 nm):  $t_R$  = 10.511 min (major),  $t_R$  = 9.625 min (minor).

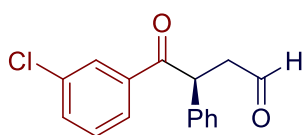

**3e**

**(S)-4-(3-chlorophenyl)-4-oxo-3-phenylbutanal (3e):** Preparative thin layer chromatography, petroleum ether/ethyl acetate = 10/1; reaction time = 60 h; yield: 71% (19.3 mg); pale yellow oil;  $[\alpha]_D^{20}$  = +137.2 (c 0.97,  $CHCl_3$ );  $^1H$  NMR (400 MHz,  $CDCl_3$ )  $\delta$  9.73 (s, 1H), 7.86 (t,  $J$  = 1.8 Hz, 1H), 7.75 (d,  $J$  = 7.8 Hz, 1H), 7.42 – 7.33 (m, 1H), 7.28 – 7.21 (m, 3H), 7.21 – 7.14 (m, 3H), 4.98 (dd,  $J$  = 9.8, 4.0 Hz, 1H), 3.55 (dd,  $J$  = 18.7, 9.8 Hz, 1H), 2.77 (dd,  $J$  = 18.8, 4.0 Hz, 1H);  $^{13}C$  NMR (100 MHz,  $CDCl_3$ )  $\delta$  198.8, 195.9, 136.6, 133.9, 131.9, 128.8, 128.4, 127.9, 127.0, 126.7, 125.9, 47.3, 46.6; ESI FTMS exact mass calcd for  $(C_{16}H_{13}ClO_2+H)^+$  requires  $m/z$  273.0682, found  $m/z$  273.0680; Enantiomeric excess: 78%, determined by HPLC (Daicel Chiralpak IC, hexane/ isopropanol = 90/10, flow rate 1.0 mL/min, T = 25 °C, 220 nm):  $t_R$  = 10.184 min (major),  $t_R$  = 9.157

min (minor).

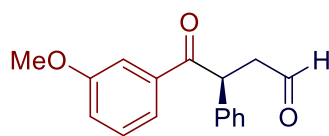

**3f**

**(S)-4-(3-methoxyphenyl)-4-oxo-3-phenylbutanal (3f):** Preparative thin layer chromatography, petroleum ether/ethyl acetate = 10/1; reaction time = 60 h; yield: 91% (24.4 mg); pale yellow solid; m.p. 110-111 °C;  $[\alpha]_D^{20} = +144.2$  (c 1.22, CHCl<sub>3</sub>); <sup>1</sup>H NMR (400 MHz, CDCl<sub>3</sub>) δ 9.81 (s, 1H), 7.55 (d, *J* = 7.8 Hz, 1H), 7.50 – 7.46 (m, 1H), 7.33 – 7.25 (m, 5H), 7.25 – 7.19 (m, 1H), 7.06 – 7.00 (m, 1H), 5.10 (dd, *J* = 9.6, 4.2 Hz, 1H), 3.79 (s, 3H), 3.60 (dd, *J* = 18.6, 9.7 Hz, 1H), 2.84 (dd, *J* = 18.6, 4.3 Hz, 1H); <sup>13</sup>C NMR (100 MHz, CDCl<sub>3</sub>) δ 200.0, 197.9, 159.7, 138.2, 137.3, 129.5, 129.3, 128.1, 127.5, 121.6, 119.7, 113.2, 55.4, 48.3, 47.8; ESI FTMS exact mass calcd for (C<sub>17</sub>H<sub>16</sub>O<sub>3</sub>+H)<sup>+</sup> requires *m/z* 269.1178, found *m/z* 269.1172; Enantiomeric excess: 74%, determined by HPLC (Daicel Chiralpak IC, hexane/ isopropanol = 90/10, flow rate 1.0 mL/min, T = 25 °C, 220 nm): *t<sub>R</sub>* = 25.453 min (major), *t<sub>R</sub>* = 19.149 min (minor).

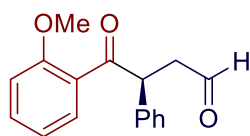

**3g**

**(S)-4-(2-methoxyphenyl)-4-oxo-3-phenylbutanal (3g):** Preparative thin layer chromatography, petroleum ether/ethyl acetate = 10/1; reaction time = 60 h; yield: 99% (26.5 mg); yellow oil;  $[\alpha]_D^{20} = +64.2$  (c 1.33, CHCl<sub>3</sub>); <sup>1</sup>H NMR (400 MHz, CDCl<sub>3</sub>) δ 9.82 (s, 1H), 7.63 (dd, *J* = 7.7, 1.8 Hz, 1H), 7.41 – 7.33 (m, 1H), 7.26 – 7.21 (m, 2H), 7.21 – 7.16 (m, 3H), 6.95 – 6.89 (m, 1H), 6.84 (d, *J* = 8.3 Hz, 1H), 5.23 (dd, *J* = 9.0, 5.2 Hz, 1H), 3.81 (s, 3H), 3.47 (dd, *J* = 17.9, 9.0 Hz, 1H), 2.77 (dd, *J* = 17.9, 5.2 Hz, 1H); <sup>13</sup>C NMR (100 MHz, CDCl<sub>3</sub>) δ 200.6, 200.4, 158.0, 138.4, 133.6, 131.0, 128.7, 128.5, 127.4, 127.1, 120.6, 111.5, 55.4, 51.9, 47.8; ESI FTMS exact mass calcd for (C<sub>17</sub>H<sub>16</sub>O<sub>3</sub>+H)<sup>+</sup> requires *m/z* 269.1178, found *m/z* 269.1174; Enantiomeric excess: 76%, determined by HPLC (Daicel Chiralpak IC, hexane/ isopropanol = 90/10, flow rate 1.0 mL/min, T = 25 °C, 220 nm): *t<sub>R</sub>* = 33.029 min (major), *t<sub>R</sub>* = 23.081 min (minor).

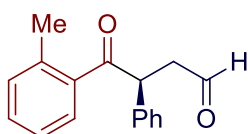

**3h**

**(S)-4-oxo-3-phenyl-4-(o-tolyl)butanal (3h):** Preparative thin layer chromatography, petroleum ether/ethyl acetate = 10/1; reaction time = 60 h; yield: 89% (22.4 mg); colorless oil;  $[\alpha]_D^{20} = +59.2$  (c 1.12,  $\text{CHCl}_3$ );  $^1\text{H}$  NMR (400 MHz,  $\text{CDCl}_3$ )  $\delta$  9.84 (s, 1H), 7.74 (d,  $J = 7.5$  Hz, 1H), 7.32 – 7.24 (m, 3H), 7.24 – 7.16 (m, 4H), 7.13 (d,  $J = 7.6$  Hz, 1H), 4.96 (dd,  $J = 10.1, 3.8$  Hz, 1H), 3.68 (dd,  $J = 18.7, 10.2$  Hz, 1H), 2.82 (dd,  $J = 18.7, 3.8$  Hz, 1H), 2.26 (s, 3H);  $^{13}\text{C}$  NMR (100 MHz,  $\text{CDCl}_3$ )  $\delta$  202.0, 200.1, 138.3, 137.9, 137.3, 131.5, 131.1, 129.1, 128.3, 127.5, 125.5, 50.4, 47.7, 20.6; ESI FTMS exact mass calcd for  $(\text{C}_{17}\text{H}_{16}\text{O}_2 + \text{H})^+$  requires  $m/z$  253.1229, found  $m/z$  253.1224; Enantiomeric excess: 80%, determined by HPLC (Daicel Chiralpak IC, hexane/ isopropanol = 90/10, flow rate 1.0 mL/min,  $T = 25^\circ\text{C}$ , 220 nm):  $t_R = 11.448$  min (minor),  $t_R = 12.229$  min (major).

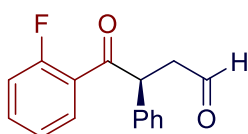

**3i**

**(S)-4-(2-fluorophenyl)-4-oxo-3-phenylbutanal (3i):** Preparative thin layer chromatography, petroleum ether/ethyl acetate = 10/1; reaction time = 60 h; yield: 70% (17.9 mg); pale yellow oil;  $[\alpha]_D^{20} = +46.4$  (c 0.90,  $\text{CHCl}_3$ );  $^1\text{H}$  NMR (400 MHz,  $\text{CDCl}_3$ )  $\delta$  9.74 (s, 1H), 7.81 – 7.69 (m, 1H), 7.41 – 7.30 (m, 1H), 7.23 – 7.11 (m, 5H), 7.07 (t,  $J = 7.6$  Hz, 1H), 6.99 – 6.91 (m, 1H), 4.99 (dd,  $J = 9.6, 4.4$  Hz, 1H), 3.50 (dd,  $J = 18.5, 9.6$  Hz, 1H), 2.74 (dd,  $J = 18.5, 4.4$  Hz, 1H);  $^{13}\text{C}$  NMR (100 MHz,  $\text{CDCl}_3$ )  $\delta$  200.0, 196.7, 161.2 ( $J = 255.5$  Hz), 137.2, 134.6 ( $J = 9.2$  Hz), 131.2 ( $J = 2.4$  Hz), 129.0, 128.5, 127.5, 125.1, 124.4, 116.7 ( $J = 23.9$  Hz), 51.3 ( $J = 6.8$  Hz), 48.1; ESI FTMS exact mass calcd for  $(\text{C}_{16}\text{H}_{13}\text{FO}_2 + \text{H})^+$  requires  $m/z$  257.0978, found  $m/z$  257.0975; Enantiomeric excess: 74%, determined by HPLC (Daicel Chiralpak IC, hexane/ isopropanol = 90/10, flow rate 1.0 mL/min,  $T = 25^\circ\text{C}$ , 220 nm):  $t_R = 15.262$  min (major),  $t_R = 12.207$  min (minor).

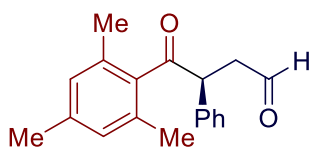

**3j**

**(S)-4-mesityl-4-oxo-3-phenylbutanal (3j):** Preparative thin layer chromatography, petroleum

ether/ethyl acetate = 10/1; reaction time = 60 h; yield: 97% (27.2 mg); yellow solid; m.p. 121-122 °C;  $[\alpha]_D^{20} = +189.8$  (c 1.37, CHCl<sub>3</sub>); <sup>1</sup>H NMR (400 MHz, CDCl<sub>3</sub>) δ 9.86 (s, 1H), 7.25 – 7.19 (m, 3H), 7.12 – 7.07 (m, 2H), 6.71 (s, 2H), 4.70 (dd, *J* = 7.3, 6.7 Hz, 1H), 3.56 (dd, *J* = 18.0, 7.6 Hz, 1H), 3.05 (dd, *J* = 18.0, 6.4 Hz, 1H), 2.22 (s, 3H), 1.94 (s, 6H); <sup>13</sup>C NMR (100 MHz, CDCl<sub>3</sub>) δ 206.6, 199.9, 138.7, 137.4, 135.7, 133.8, 129.0, 128.7, 128.5, 128.3, 127.7, 125.5, 124.8, 53.7, 44.5, 21.1, 19.4; ESI FTMS exact mass calcd for (C<sub>19</sub>H<sub>20</sub>O<sub>2</sub>+H)<sup>+</sup> requires *m/z* 281.1542, found *m/z* 281.1537; Enantiomeric excess: 74%, determined by HPLC (Daicel Chiralpak IC, hexane/ isopropanol = 90/10, flow rate 1.0 mL/min, T = 25 °C, 220 nm): *t<sub>R</sub>* = 10.310 min (major), *t<sub>R</sub>* = 12.322 min (minor).

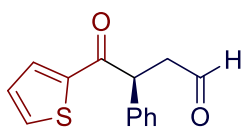

**3k**

**(S)-4-oxo-3-phenyl-4-(thiophen-2-yl)butanal (3k):** Preparative thin layer chromatography, petroleum ether/ethyl acetate = 10/1; reaction time = 60 h; yield: 44% (10.7 mg); yellow solid; m.p. 89-90 °C;  $[\alpha]_D^{20} = +129.8$  (c 0.54, CHCl<sub>3</sub>); <sup>1</sup>H NMR (400 MHz, CDCl<sub>3</sub>) δ 9.80 (s, 1H), 7.72 (d, *J* = 3.8 Hz, 1H), 7.57 (d, *J* = 4.9 Hz, 1H), 7.32 (d, *J* = 4.3 Hz, 4H), 7.27 – 7.22 (m, 1H), 7.08 – 7.01 (m, 1H), 4.95 (dd, *J* = 9.5, 4.4 Hz, 1H), 3.59 (dd, *J* = 18.6, 9.5 Hz, 1H), 2.84 (dd, *J* = 18.6, 4.4 Hz, 1H); <sup>13</sup>C NMR (100 MHz, CDCl<sub>3</sub>) δ 199.8, 190.9, 142.9, 138.4, 133.9, 133.0, 129.3, 128.1, 127.7, 48.9, 47.9; ESI FTMS exact mass calcd for (C<sub>14</sub>H<sub>12</sub>O<sub>2</sub>S+H)<sup>+</sup> requires *m/z* 245.0636, found *m/z* 245.0633; Enantiomeric excess: 62%, determined by HPLC (Daicel Chiralpak IC, hexane/ isopropanol = 90/10, flow rate 1.0 mL/min, T = 25 °C, 220 nm): *t<sub>R</sub>* = 31.693 min (major), *t<sub>R</sub>* = 21.162 min (minor).

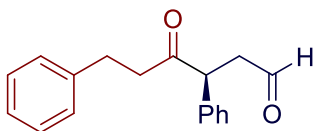

**3l**

**(S)-4-oxo-3,6-diphenylhexanal (3l):** Preparative thin layer chromatography, petroleum ether/ethyl acetate = 10/1; reaction time = 60 h; yield: 64% (17.0 mg); colorless oil;  $[\alpha]_D^{20} = +128.9$  (c 0.85, CHCl<sub>3</sub>); <sup>1</sup>H NMR (400 MHz, CDCl<sub>3</sub>) δ 9.75 (s, 1H), 7.33 – 7.24 (m, 3H), 7.21 (t, *J* = 7.3 Hz, 2H), 7.14 (t, *J* = 7.3 Hz, 3H), 7.05 (d, *J* = 7.1 Hz, 2H), 4.21 (dd, *J* = 9.8, 4.1 Hz, 1H), 3.46 (dd, *J* = 18.6,

9.9 Hz, 1H), 2.91 – 2.62 (m, 5H);  $^{13}\text{C}$  NMR (100 MHz,  $\text{CDCl}_3$ )  $\delta$  207.6, 200.1, 140.8, 137.3, 129.3, 128.4, 128.2, 127.7, 126.0, 52.2, 46.7, 42.8, 29.7; ESI FTMS exact mass calcd for  $(\text{C}_{18}\text{H}_{18}\text{O}_2+\text{H})^+$  requires  $m/z$  267.1385, found  $m/z$  267.1381; Enantiomeric excess: 70%, determined by HPLC (Daicel Chiralpak IG-3, hexane/ isopropanol = 90/10, flow rate 1.0 mL/min,  $T = 25\text{ }^\circ\text{C}$ , 192 nm):  $t_R = 9.668$  min (major),  $t_R = 9.111$  min (minor).

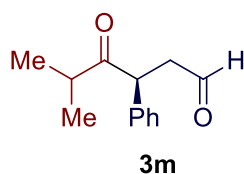

**(S)-5-methyl-4-oxo-3-phenylhexanal (3m):** Preparative thin layer chromatography, petroleum ether/ethyl acetate = 10/1; reaction time = 60 h; yield: 75% (15.3 mg); colorless oil;  $[\alpha]_D^{20} = +216.3$  (c 1.07,  $\text{CHCl}_3$ );  $^1\text{H}$  NMR (400 MHz,  $\text{CDCl}_3$ )  $\delta$  9.75 (s, 1H), 7.36 – 7.30 (m, 2H), 7.30 – 7.24 (m, 1H), 7.22 – 7.15 (m, 2H), 4.40 (dd,  $J = 9.9, 4.1$  Hz, 1H), 3.45 (dd,  $J = 18.5, 9.9$  Hz, 1H), 2.71 (dt,  $J = 13.8, 6.9$  Hz, 1H), 2.63 (dd,  $J = 18.5, 4.1$  Hz, 1H), 1.16 (d,  $J = 7.1$  Hz, 3H), 0.89 (d,  $J = 6.7$  Hz, 3H);  $^{13}\text{C}$  NMR (100 MHz,  $\text{CDCl}_3$ )  $\delta$  212.5, 200.0, 137.7, 129.2, 128.3, 127.6, 50.6, 47.1, 39.4, 19.2, 18.2; ESI FTMS exact mass calcd for  $(\text{C}_{13}\text{H}_{16}\text{O}_2+\text{H})^+$  requires  $m/z$  205.1228, found  $m/z$  205.1229; Enantiomeric excess: 72%, determined by HPLC (Daicel Chiralpak IC, hexane/ isopropanol = 95/5, flow rate 1.0 mL/min,  $T = 25\text{ }^\circ\text{C}$ , 220 nm):  $t_R = 9.281$  min (major),  $t_R = 11.081$  min (minor).

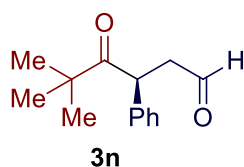

**(S)-5,5-dimethyl-4-oxo-3-phenylhexanal (3n):** Preparative thin layer chromatography, petroleum ether/ethyl acetate = 10/1; reaction time = 60 h; yield: 68% (14.8 mg); colorless oil;  $[\alpha]_D^{20} = +190.4$  (c 0.79,  $\text{CHCl}_3$ );  $^1\text{H}$  NMR (400 MHz,  $\text{CDCl}_3$ )  $\delta$  9.68 (s, 1H), 7.35 – 7.28 (m, 2H), 7.27 – 7.22 (m, 1H), 7.22 – 7.16 (m, 2H), 4.64 (dd,  $J = 9.9, 4.1$  Hz, 1H), 3.42 (dd,  $J = 18.6, 9.9$  Hz, 1H), 2.65 (dd,  $J = 18.6, 4.1$  Hz, 1H), 1.09 (s, 9H);  $^{13}\text{C}$  NMR (100 MHz,  $\text{CDCl}_3$ )  $\delta$  214.2, 200.0, 138.1, 129.1, 128.1, 127.4, 49.4, 46.9, 45.1, 27.3; ESI FTMS exact mass calcd for  $(\text{C}_{14}\text{H}_{18}\text{O}_2+\text{H})^+$  requires  $m/z$  219.1385, found  $m/z$  219.1386; Enantiomeric excess: 80%, determined by HPLC (Daicel Chiralpak IC, hexane/ isopropanol = 95/5, flow rate 1.0 mL/min,  $T = 25\text{ }^\circ\text{C}$ , 220 nm):  $t_R = 7.045$  min (major),  $t_R = 8.062$  min (minor).

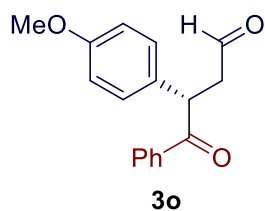

**(S)-3-(4-methoxyphenyl)-4-oxo-4-phenylbutanal (3o):** Preparative thin layer chromatography, petroleum ether/ethyl acetate = 10/1; reaction time = 60 h; yield: 74% (19.8 mg); pale yellow oil;  $[\alpha]_D^{20} = +112.2$  (c 0.99,  $\text{CHCl}_3$ );  $^1\text{H}$  NMR (400 MHz,  $\text{CDCl}_3$ )  $\delta$  9.72 (s, 1H), 7.88 (d,  $J = 7.5$  Hz, 2H), 7.40 (t,  $J = 7.3$  Hz, 1H), 7.30 (t,  $J = 7.5$  Hz, 2H), 7.10 (d,  $J = 8.5$  Hz, 2H), 6.74 (d,  $J = 8.5$  Hz, 2H), 5.00 (dd,  $J = 9.4, 4.3$  Hz, 1H), 3.66 (s, 3H), 3.48 (dd,  $J = 18.5, 9.5$  Hz, 1H), 2.74 (dd,  $J = 18.5, 4.3$  Hz, 1H);  $^{13}\text{C}$  NMR (100 MHz,  $\text{CDCl}_3$ )  $\delta$  200.3, 198.4, 158.9, 136.0, 133.0, 130.1, 129.2, 128.9, 128.5, 114.7, 55.2, 48.3, 46.7; ESI FTMS exact mass calcd for  $(\text{C}_{17}\text{H}_{16}\text{O}_3+\text{H})^+$  requires  $m/z$  269.1178, found  $m/z$  269.1176; Enantiomeric excess: 68%, determined by HPLC (Daicel Chiralpak IC, hexane/ isopropanol = 90/10, flow rate 1.0 mL/min,  $T = 25^\circ\text{C}$ , 220 nm):  $t_R = 27.571$  min (major),  $t_R = 19.673$  min (minor).

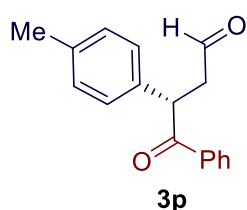

**(S)-4-oxo-4-phenyl-3-(p-tolyl)butanal (3p):** Preparative thin layer chromatography, petroleum ether/ethyl acetate = 10/1; reaction time = 60 h; yield: 89% (22.4 mg); pale yellow solid; m.p. 108-109  $^\circ\text{C}$ ;  $[\alpha]_D^{20} = +124.3$  (c 1.12,  $\text{CHCl}_3$ );  $^1\text{H}$  NMR (400 MHz,  $\text{CDCl}_3$ )  $\delta$  9.81 (s, 1H), 8.01 – 7.92 (m, 2H), 7.47 (t,  $J = 7.4$  Hz, 1H), 7.37 (t,  $J = 7.6$  Hz, 2H), 7.15 (d,  $J = 8.1$  Hz, 2H), 7.10 (d,  $J = 8.0$  Hz, 2H), 5.09 (dd,  $J = 9.6, 4.3$  Hz, 1H), 3.58 (dd,  $J = 18.5, 9.6$  Hz, 1H), 2.81 (dd,  $J = 18.5, 4.3$  Hz, 1H), 2.27 (s, 3H);  $^{13}\text{C}$  NMR (100 MHz,  $\text{CDCl}_3$ )  $\delta$  200.2, 198.3, 137.2, 136.0, 135.2, 133.0, 129.9, 128.9, 128.5, 127.9, 48.3, 47.2, 21.0; ESI FTMS exact mass calcd for  $(\text{C}_{17}\text{H}_{16}\text{O}_2+\text{H})^+$  requires  $m/z$  253.1228, found  $m/z$  253.1224; Enantiomeric excess: 72%, determined by HPLC (Daicel Chiralpak IC, hexane/ isopropanol = 90/ 10, flow rate 1.0 mL/min,  $T = 25^\circ\text{C}$ , 220 nm):  $t_R = 18.431$  min (major),  $t_R = 13.323$  min (minor).

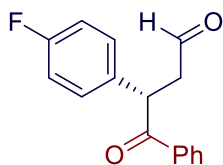

**3q**

**(S)-3-(4-fluorophenyl)-4-oxo-4-phenylbutanal (3q):** Preparative thin layer chromatography, petroleum ether/ethyl acetate = 10/1; reaction time = 60 h; yield: 82% (21.0 mg); colorless oil;  $[\alpha]_D^{20} = +112.7$  (c 1.05,  $\text{CHCl}_3$ );  $^1\text{H}$  NMR (400 MHz,  $\text{CDCl}_3$ )  $\delta$  9.72 (s, 1H), 7.94 – 7.78 (m, 2H), 7.42 (t,  $J = 7.4$  Hz, 1H), 7.31 (t,  $J = 7.6$  Hz, 2H), 7.20 – 7.13 (m, 2H), 6.99 – 6.80 (m, 2H), 5.05 (dd,  $J = 9.4, 4.4$  Hz, 1H), 3.51 (dd,  $J = 18.6, 9.5$  Hz, 1H), 2.75 (dd,  $J = 18.6, 4.4$  Hz, 1H);  $^{13}\text{C}$  NMR (100 MHz,  $\text{CDCl}_3$ )  $\delta$  199.8, 198.1, 162.1 ( $J = 246.7$  Hz), 160.8, 135.8, 133.9 ( $J = 3.3$  Hz), 133.2, 129.7 ( $J = 8.1$  Hz), 128.9, 128.6, 116.2 ( $J = 21.5$  Hz), 48.3, 46.6; ESI FTMS exact mass calcd for  $(\text{C}_{16}\text{H}_{13}\text{FO}_2 + \text{H})^+$  requires  $m/z$  257.0978, found  $m/z$  257.0977; Enantiomeric excess: 70%, determined by HPLC (Daicel Chiralpak IC, hexane/ isopropanol = 90/10, flow rate 1.0 mL/min,  $T = 25^\circ\text{C}$ , 220 nm):  $t_R = 16.221$  min (major),  $t_R = 11.609$  min (minor).

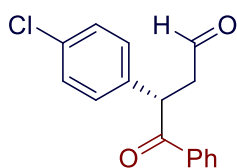

**3r**

**(S)-3-(4-chlorophenyl)-4-oxo-4-phenylbutanal (3r):** Preparative thin layer chromatography, petroleum ether/ethyl acetate = 10/1; reaction time = 60 h; yield: 77% (20.9 mg); colorless oil;  $[\alpha]_D^{20} = +97.1$  (c 1.05,  $\text{CHCl}_3$ );  $^1\text{H}$  NMR (400 MHz,  $\text{CDCl}_3$ )  $\delta$  9.80 (s, 1H), 7.98 – 7.90 (m, 2H), 7.54 – 7.47 (m, 1H), 7.43 – 7.36 (m, 2H), 7.29 – 7.25 (m, 2H), 7.24 – 7.19 (m, 2H), 5.12 (dd,  $J = 9.4, 4.4$  Hz, 1H), 3.59 (dd,  $J = 18.6, 9.5$  Hz, 1H), 2.83 (dd,  $J = 18.7, 4.4$  Hz, 1H);  $^{13}\text{C}$  NMR (100 MHz,  $\text{CDCl}_3$ )  $\delta$  199.6, 197.8, 136.7, 135.8, 133.5, 133.3, 129.5, 129.4, 128.9, 128.6, 48.1, 46.7; ESI FTMS exact mass calcd for  $(\text{C}_{16}\text{H}_{13}\text{ClO}_2 + \text{H})^+$  requires  $m/z$  273.0682, found  $m/z$  273.0685; Enantiomeric excess: 76%, determined by HPLC (Daicel Chiralpak IC, hexane/ isopropanol = 90/10, flow rate 1.0 mL/min,  $T = 25^\circ\text{C}$ , 220 nm):  $t_R = 14.691$  min (major),  $t_R = 11.123$  min (minor).



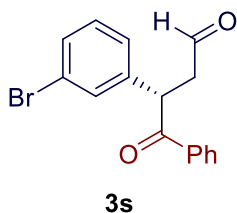

**(S)-3-(3-bromophenyl)-4-oxo-4-phenylbutanal (3s):** Preparative thin layer chromatography, petroleum ether/ethyl acetate = 10/1; reaction time = 60 h; yield: 92% (29.1 mg); colorless oil;  $[\alpha]_D^{20} = +247.1$  (c 1.46,  $\text{CHCl}_3$ );  $^1\text{H}$  NMR (400 MHz,  $\text{CDCl}_3$ )  $\delta$  9.79 (s, 1H), 8.01 – 7.90 (m, 2H), 7.51 (t,  $J = 7.4$  Hz, 1H), 7.47 – 7.38 (m, 3H), 7.37 – 7.33 (m, 1H), 7.24 – 7.13 (m, 2H), 5.10 (dd,  $J = 9.6, 4.2$  Hz, 1H), 3.60 (dd,  $J = 18.7, 9.6$  Hz, 1H), 2.84 (dd,  $J = 18.7, 4.2$  Hz, 1H);  $^{13}\text{C}$  NMR (100 MHz,  $\text{CDCl}_3$ )  $\delta$  199.5, 197.6, 140.5, 135.7, 133.4, 131.0, 130.8, 130.7, 128.9, 128.7, 126.8, 123.2, 48.2, 46.9; ESI FTMS exact mass calcd for  $(\text{C}_{16}\text{H}_{13}\text{BrO}_2 + \text{H})^+$  requires  $m/z$  317.0177, found  $m/z$  317.0180; Enantiomeric excess: 74%, determined by HPLC (Daicel Chiralpak IC, hexane/isopropanol = 90/10, flow rate 1.0 mL/min,  $T = 25$  °C, 220 nm):  $t_R = 14.231$  min (major),  $t_R = 10.801$  min (minor).

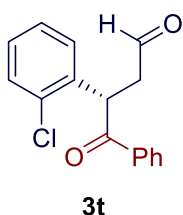

**(S)-3-(2-chlorophenyl)-4-oxo-4-phenylbutanal (3t):** Preparative thin layer chromatography, petroleum ether/ethyl acetate = 10/1; reaction time = 60 h; yield: 79% (21.5 mg); pale yellow oil;  $[\alpha]_D^{20} = +170.6$  (c 1.07,  $\text{CHCl}_3$ );  $^1\text{H}$  NMR (400 MHz,  $\text{CDCl}_3$ )  $\delta$  9.83 (s, 1H), 7.92 (dd,  $J = 5.2, 3.3$  Hz, 2H), 7.53 – 7.47 (m, 1H), 7.46 – 7.35 (m, 3H), 7.21 – 7.10 (m, 2H), 7.10 – 7.06 (m, 1H), 5.59 (dd,  $J = 10.2, 3.5$  Hz, 1H), 3.48 (dd,  $J = 18.3, 10.2$  Hz, 1H), 2.76 (dd,  $J = 18.3, 3.5$  Hz, 1H);  $^{13}\text{C}$  NMR (100 MHz,  $\text{CDCl}_3$ )  $\delta$  199.5, 197.8, 136.0, 135.6, 133.3, 133.0, 130.3, 128.9, 128.8, 128.6, 127.7, 46.5, 44.2; ESI FTMS exact mass calcd for  $(\text{C}_{16}\text{H}_{13}\text{ClO}_2 + \text{H})^+$  requires  $m/z$  273.0682, found  $m/z$  273.0677; Enantiomeric excess: 62%, determined by HPLC (Daicel Chiralpak IC, hexane/isopropanol = 90/ 10, flow rate 1.0 mL/min,  $T = 25$  °C, 220 nm):  $t_R = 14.590$  min (major),  $t_R = 11.179$  min (minor).

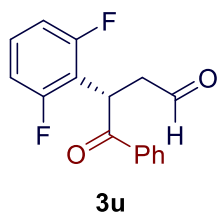

**(S)-3-(2,6-difluorophenyl)-4-oxo-4-phenylbutanal (3u):** Preparative thin layer chromatography, petroleum ether/ethyl acetate = 10/1; reaction time = 60 h; yield: 93% (25.5 mg); colorless oil;  $[\alpha]_D^{20} = +128.1$  (c 1.27,  $\text{CHCl}_3$ );  $^1\text{H}$  NMR (400 MHz,  $\text{CDCl}_3$ )  $\delta$  9.83 (s, 1H), 7.79 (d,  $J = 7.3$  Hz, 2H), 7.40 (t,  $J = 7.4$  Hz, 1H), 7.29 (t,  $J = 7.7$  Hz, 2H), 7.15 – 7.05 (m, 1H), 6.77 (t,  $J = 8.2$  Hz, 2H), 5.31 (dd,  $J = 9.1, 4.3$  Hz, 1H), 3.60 (dd,  $J = 18.0, 9.1$  Hz, 1H), 2.63 (dd,  $J = 18.0, 4.4$  Hz, 1H);  $^{13}\text{C}$  NMR (100 MHz,  $\text{CDCl}_3$ )  $\delta$  198.3, 195.0, 159.6 ( $J = 249.2$  Hz), 158.4, 134.4, 132.1, 128.6 ( $J = 10.4$  Hz), 127.4 ( $J = 17.8$  Hz), 114.3, 111.1, 110.9 ( $J = 25.2$  Hz), 42.7, 36.9; ESI FTMS exact mass calcd for  $(\text{C}_{16}\text{H}_{12}\text{F}_2\text{O}_2 + \text{H})^+$  requires  $m/z$  275.0883, found  $m/z$  275.0878; Enantiomeric excess: 76%, determined by HPLC (Daicel Chiralpak IC, hexane/ isopropanol = 90/10, flow rate 1.0 mL/min,  $T = 25^\circ\text{C}$ , 220 nm):  $t_R = 19.560$  min (major),  $t_R = 13.253$  min (minor).

## 7. Unsuccessful Substrates

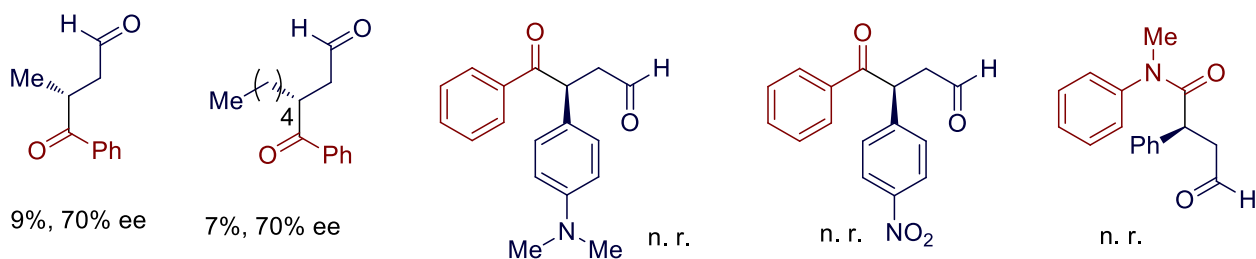

## 8. Copies of NMR spectra for products 3

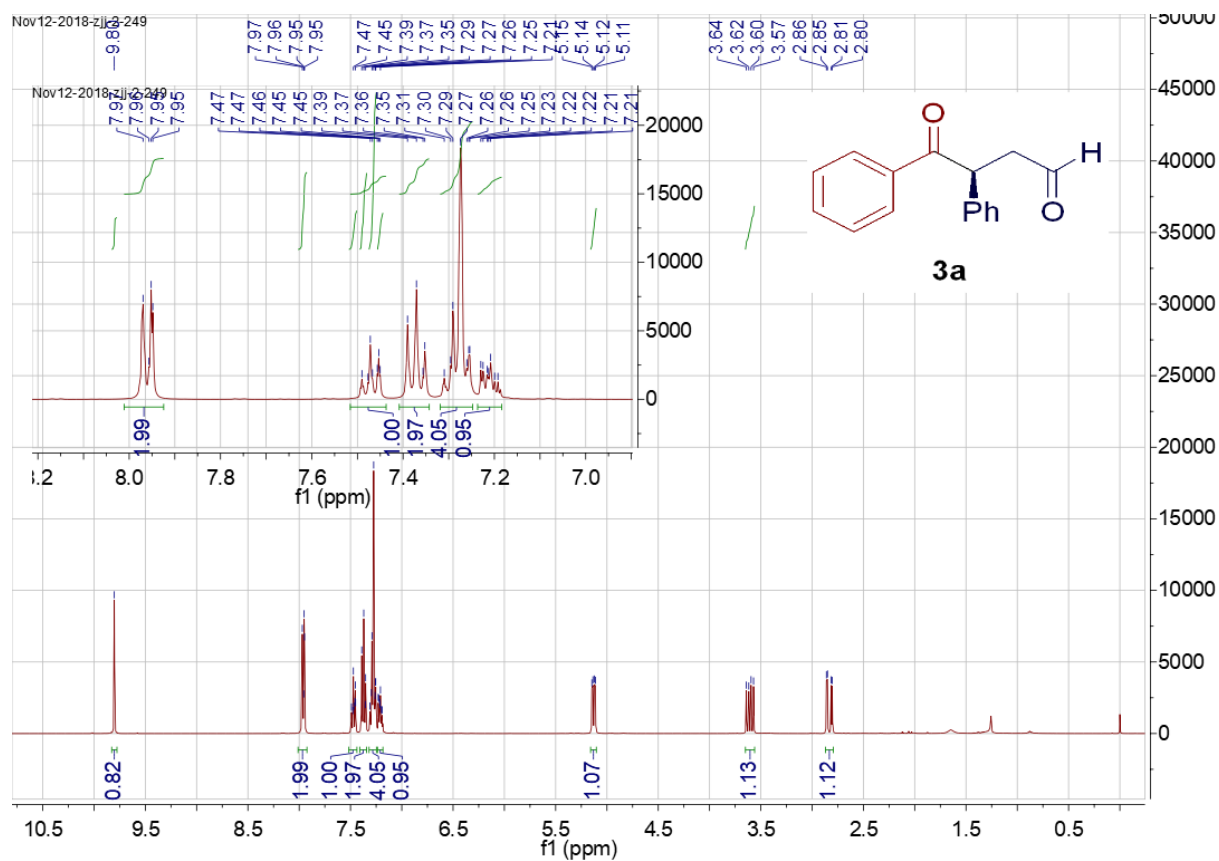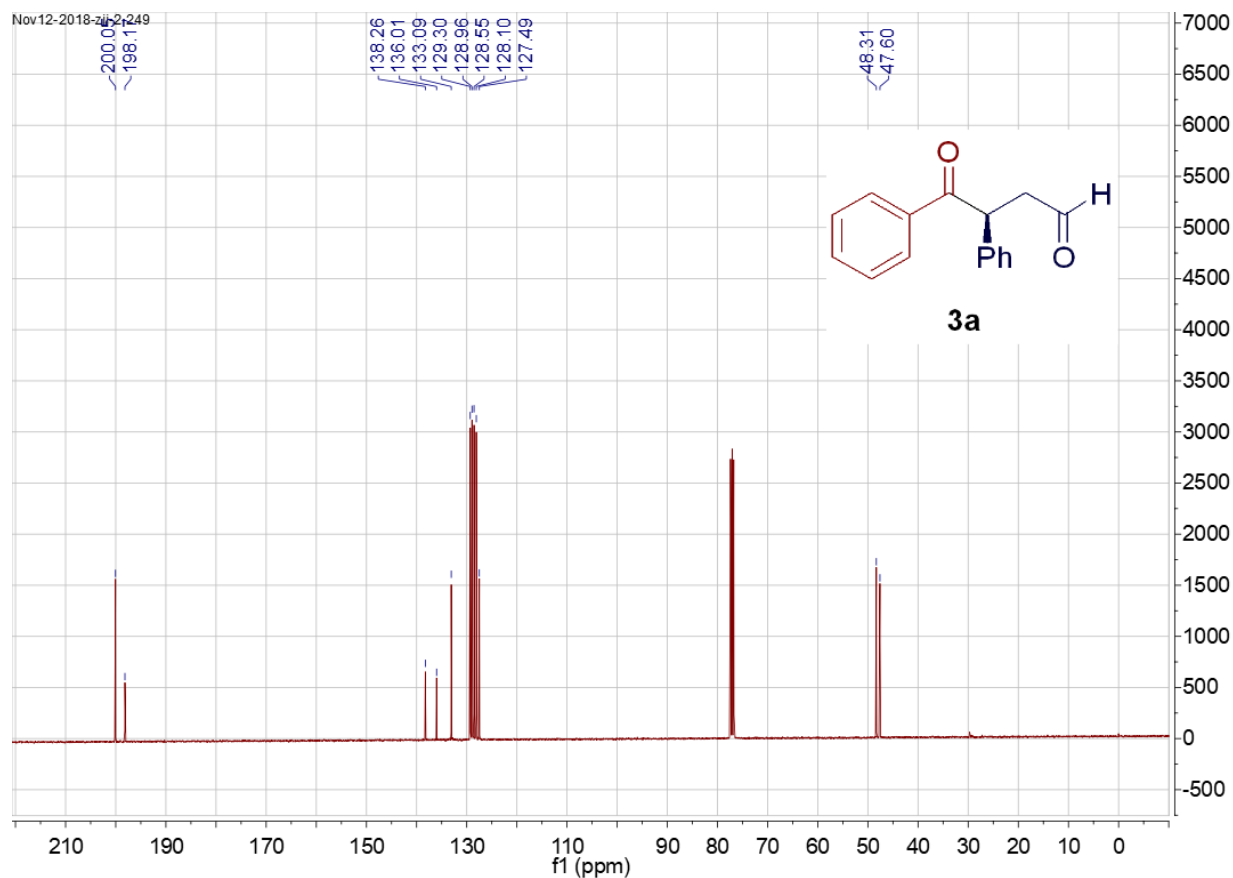

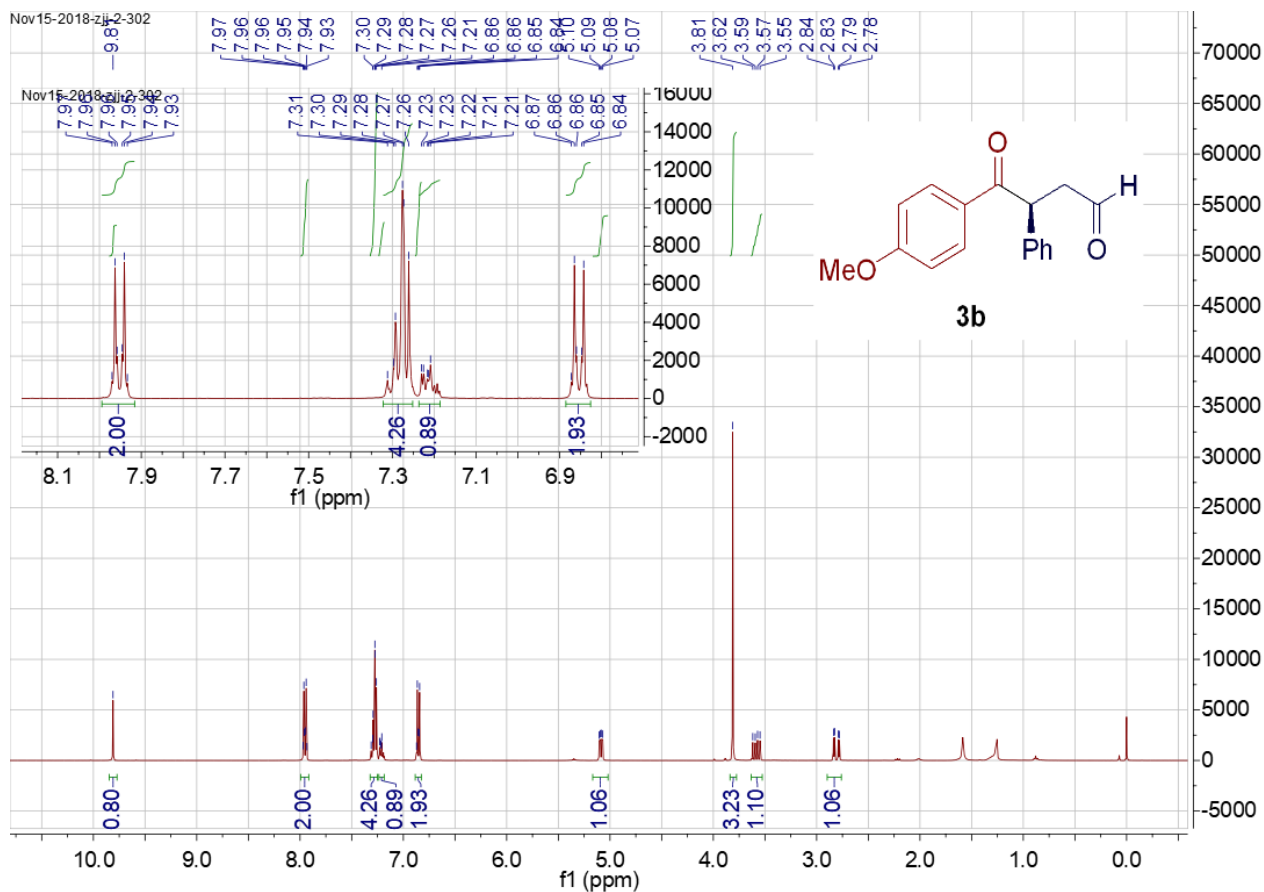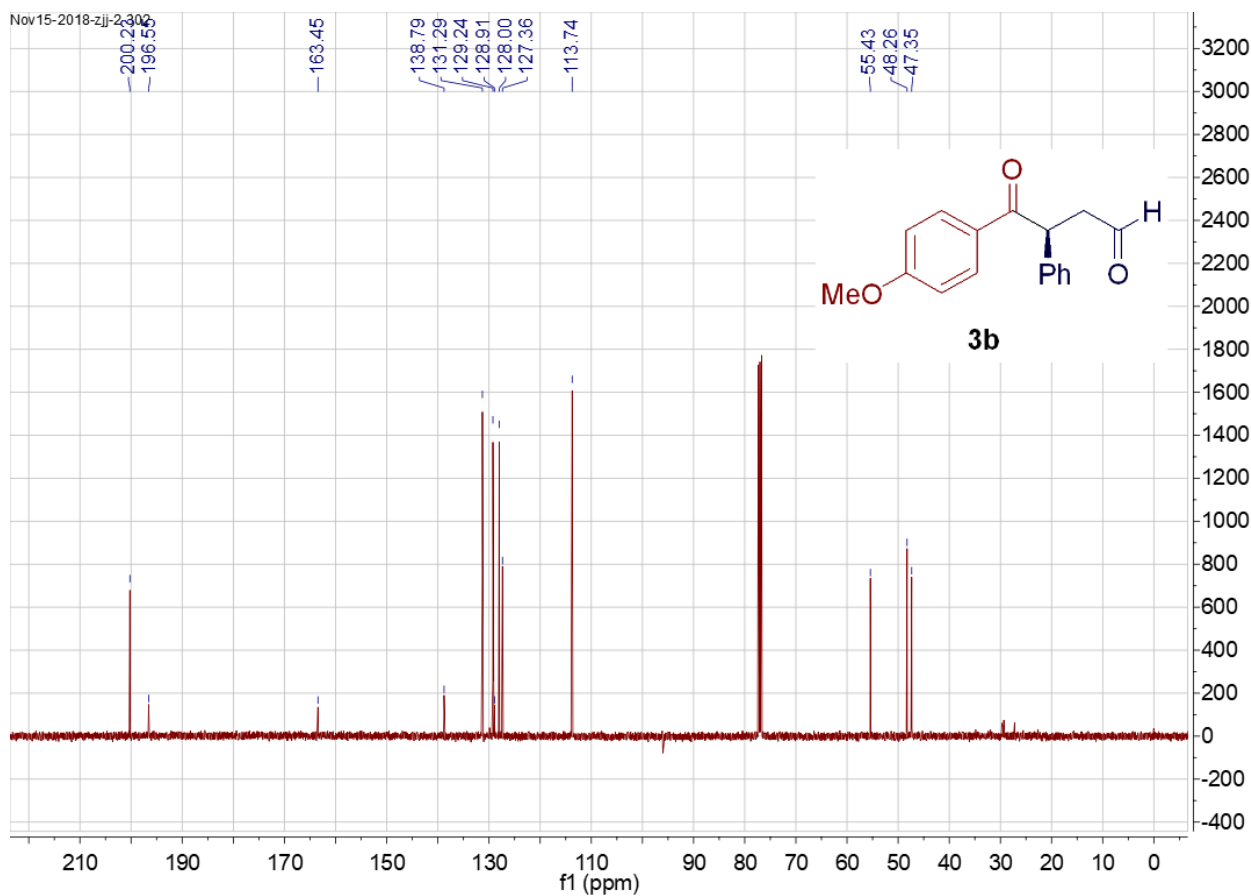

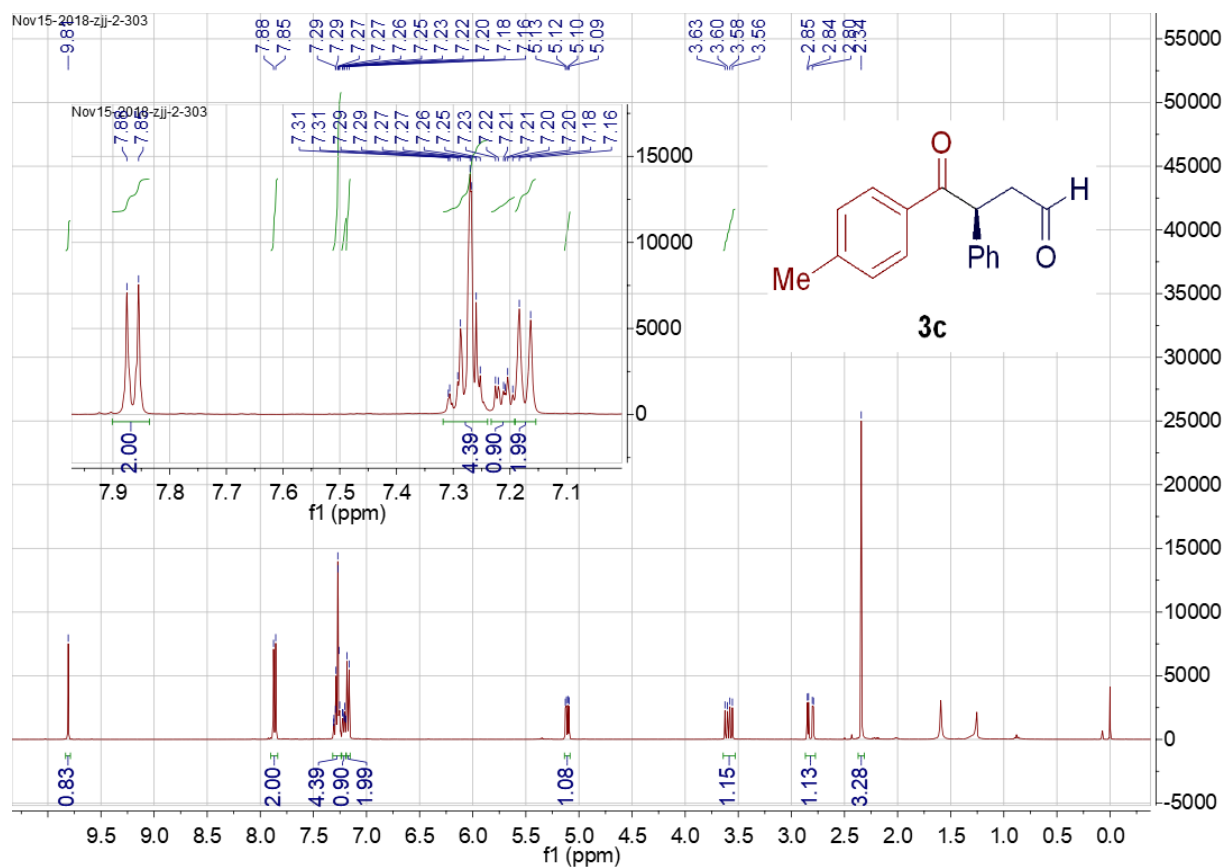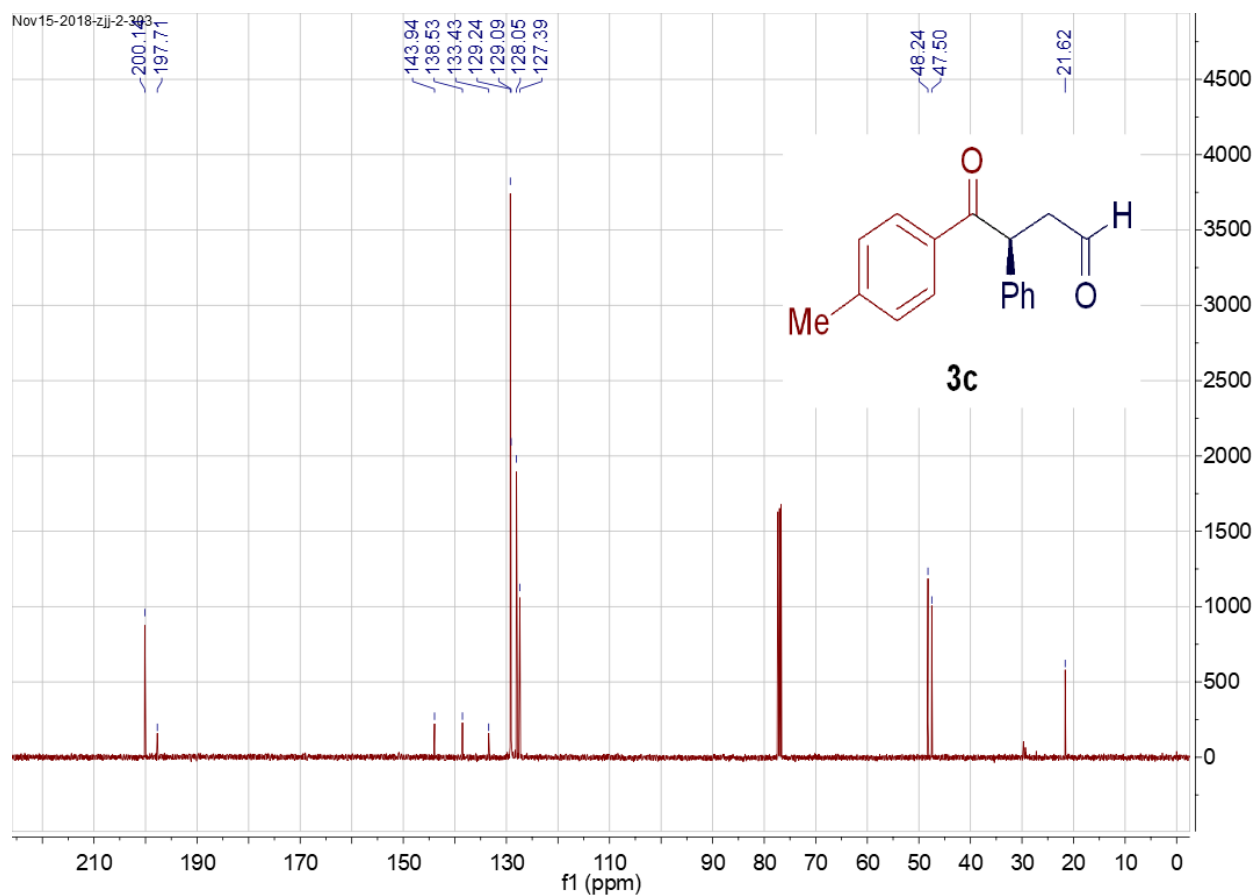

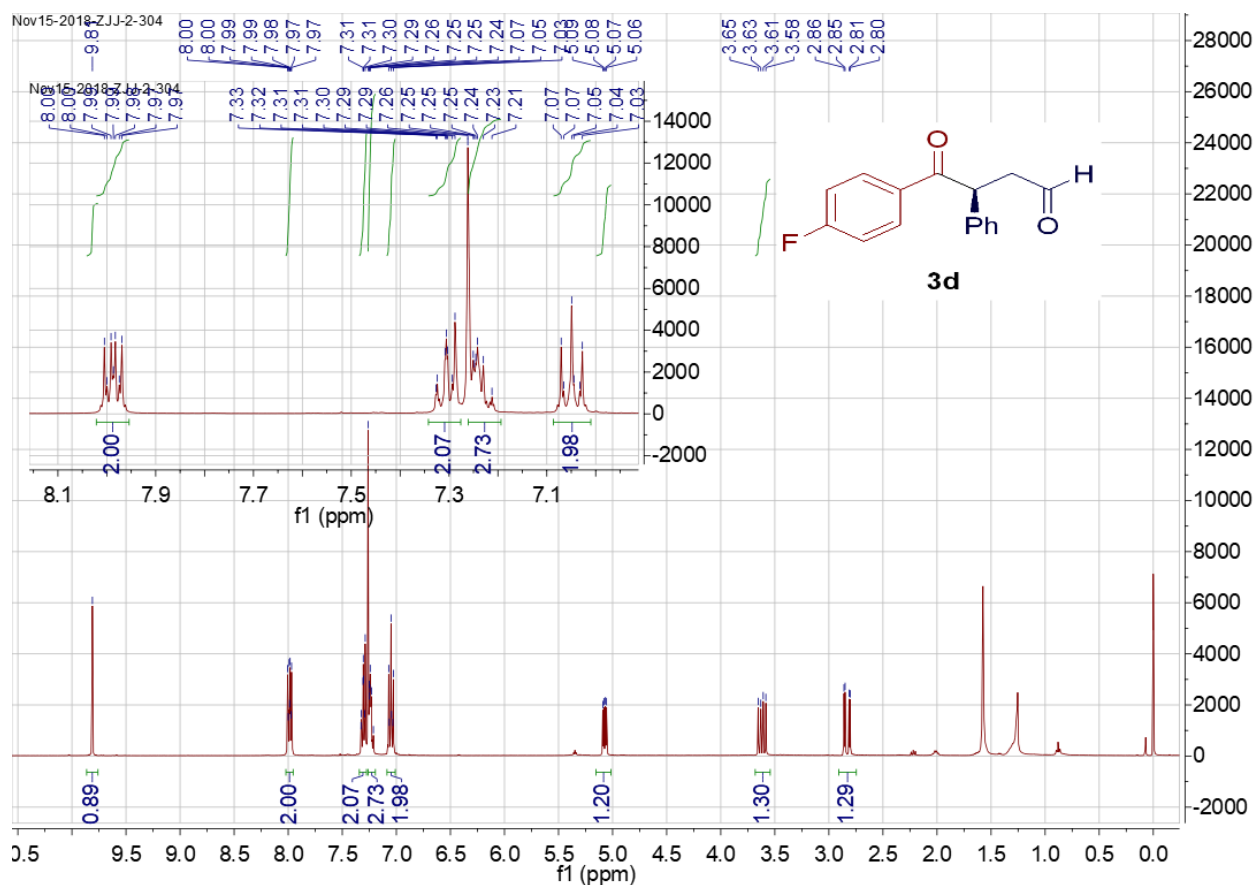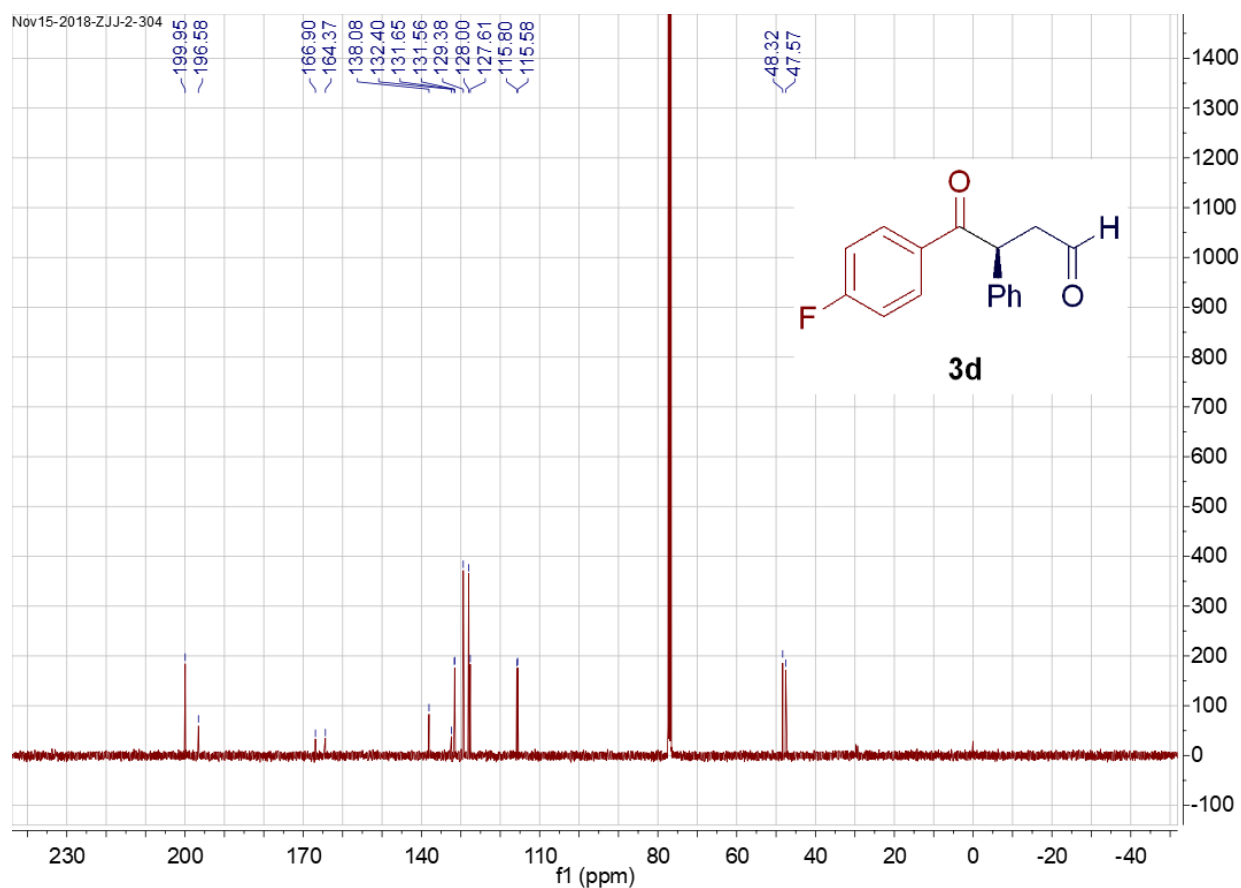

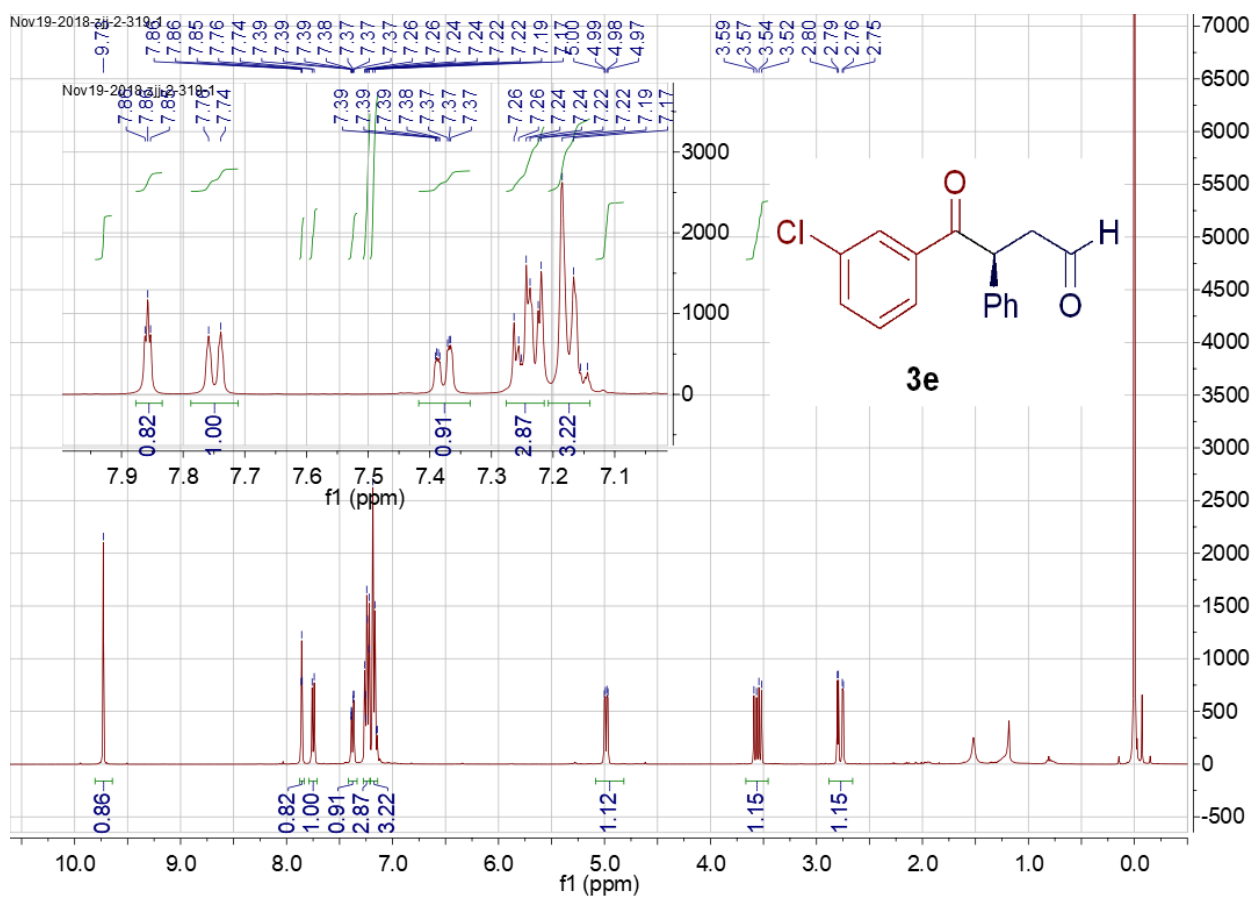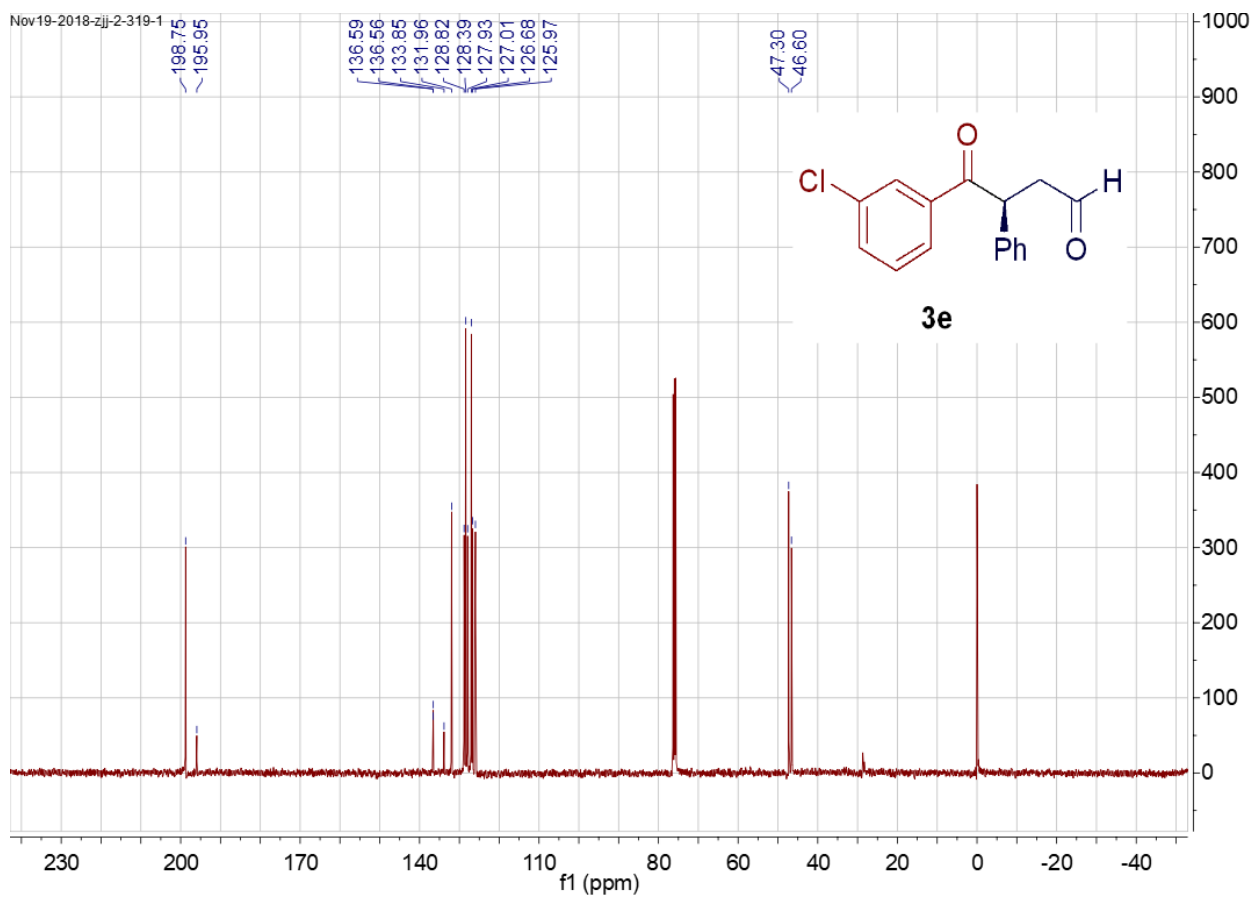

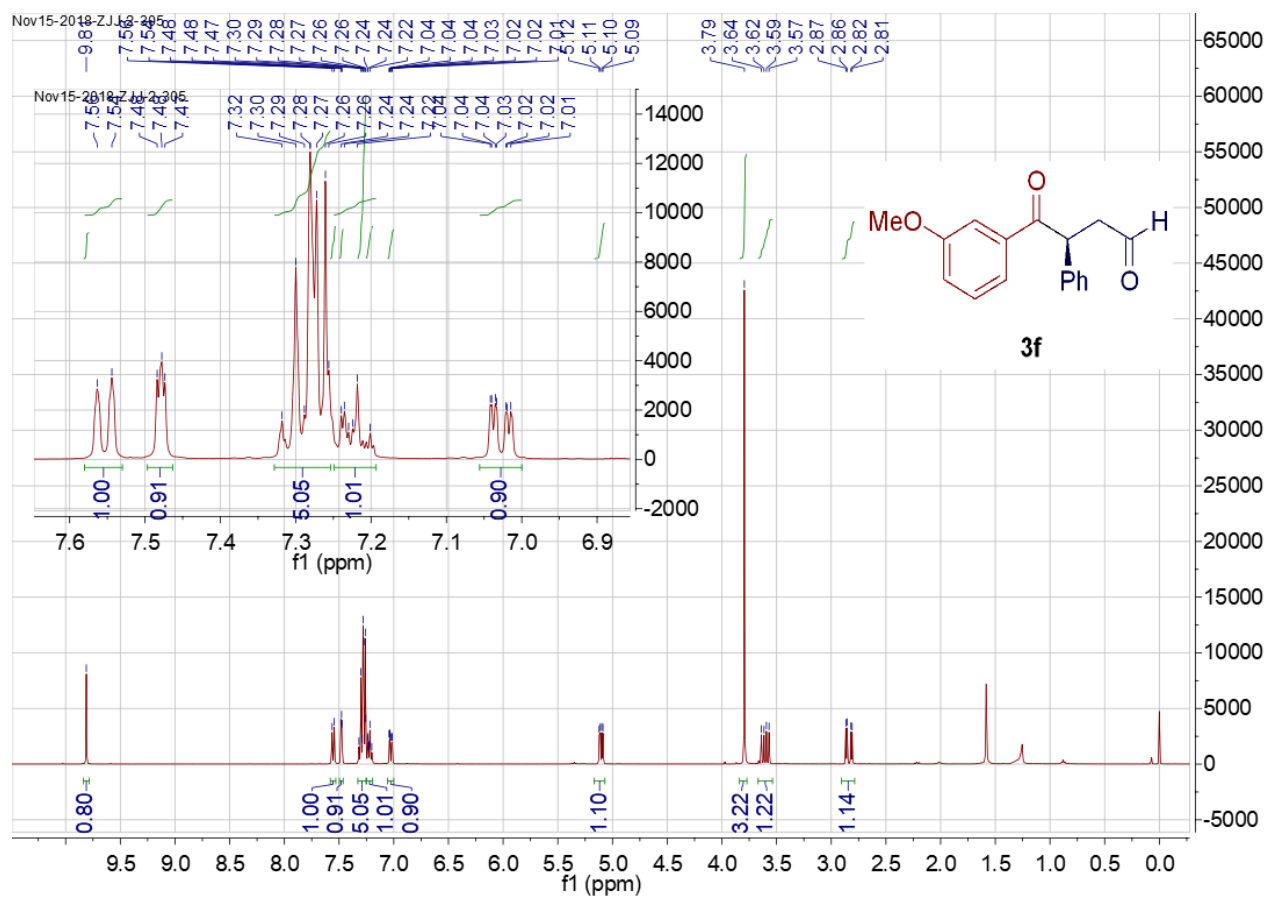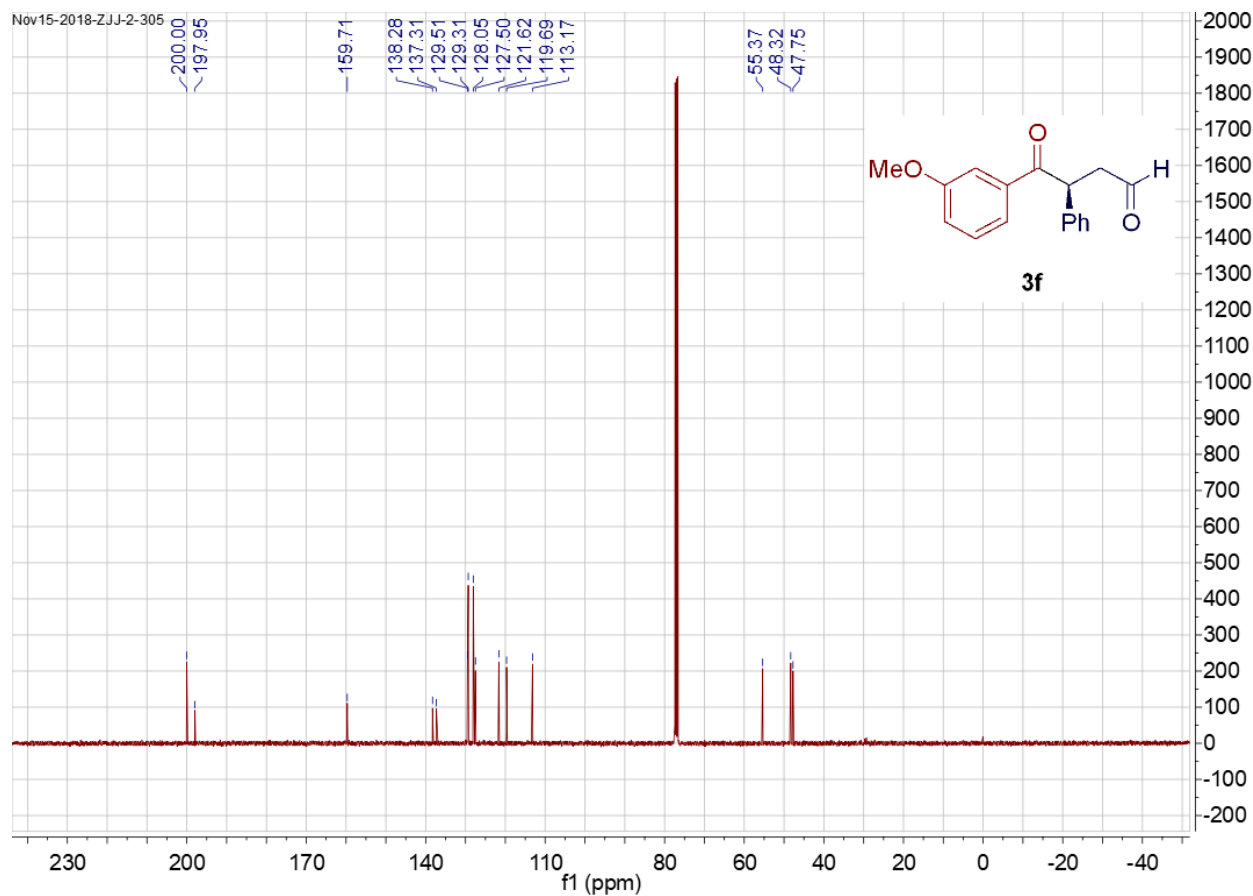



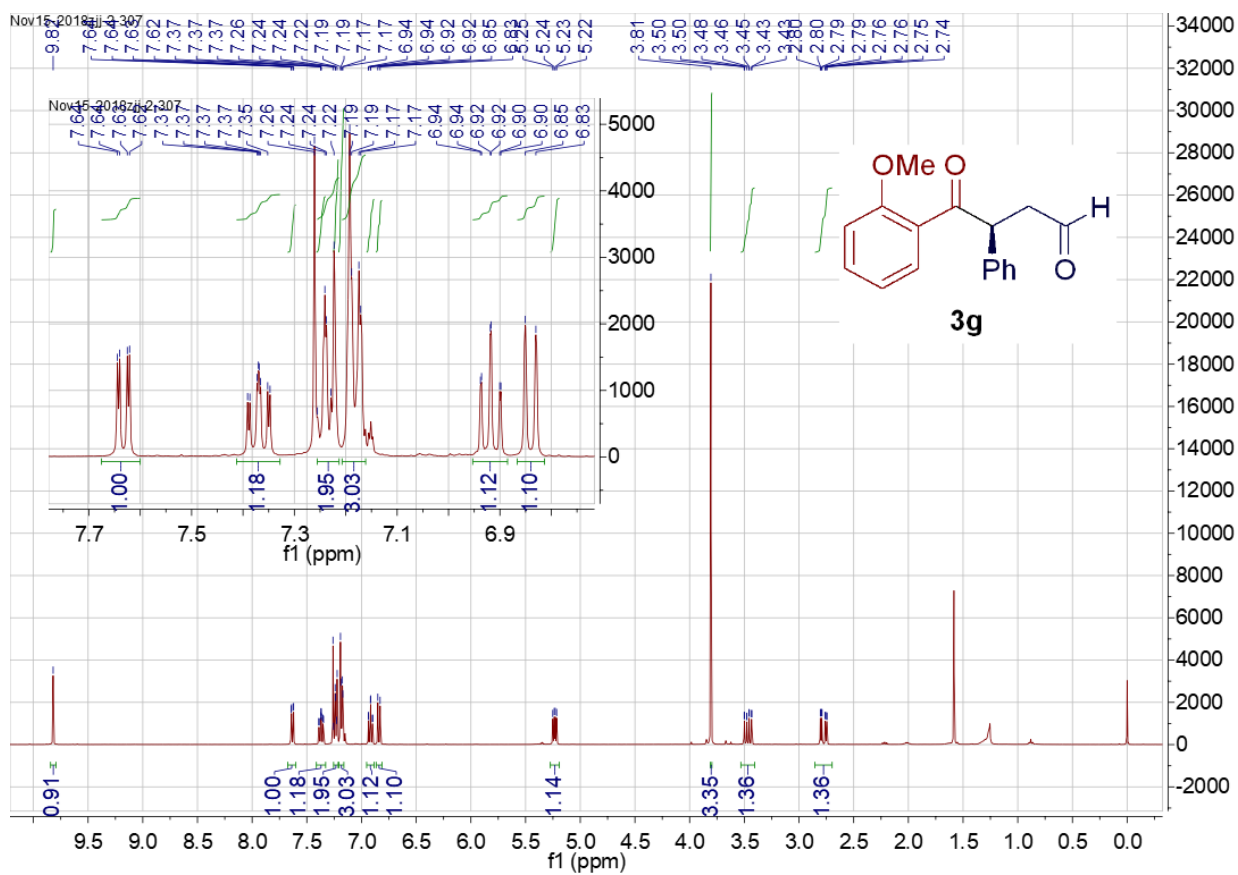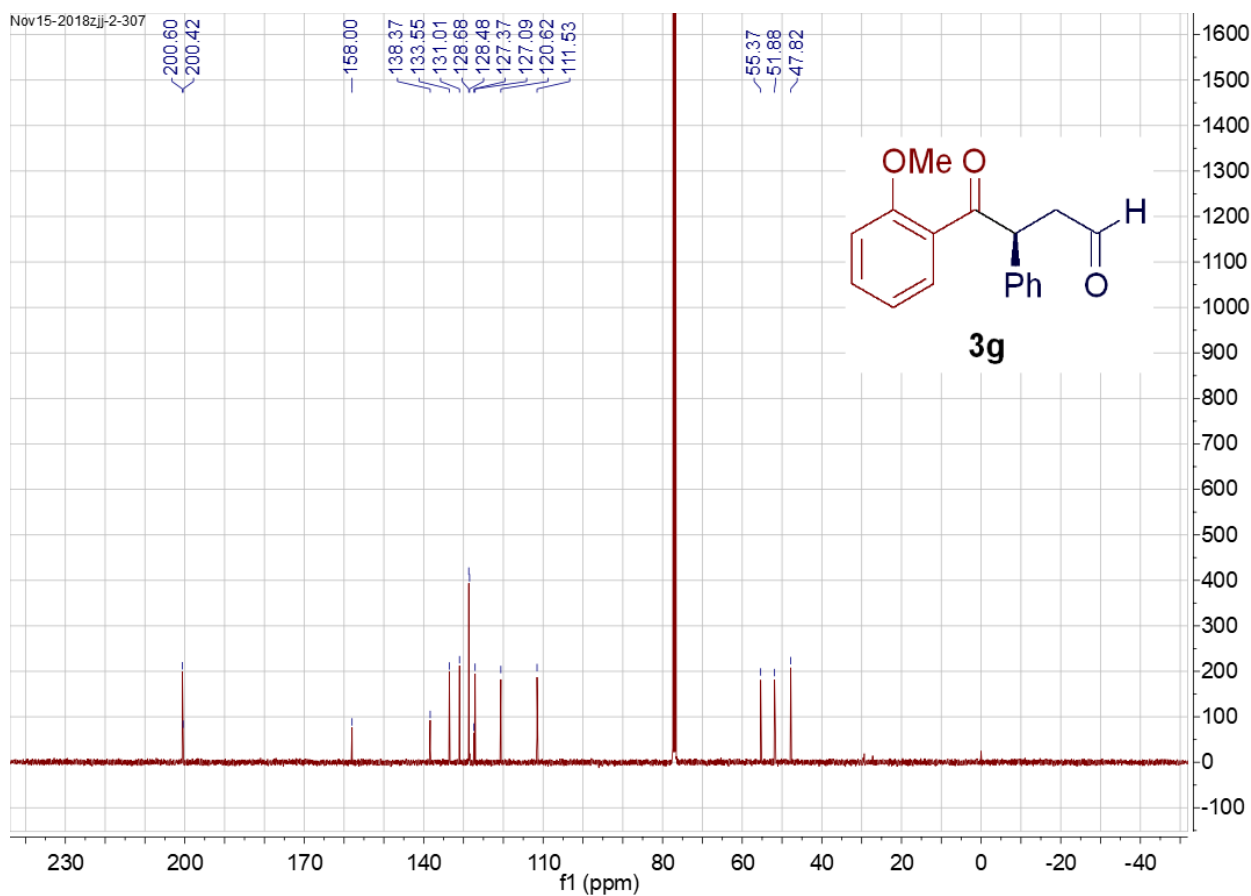

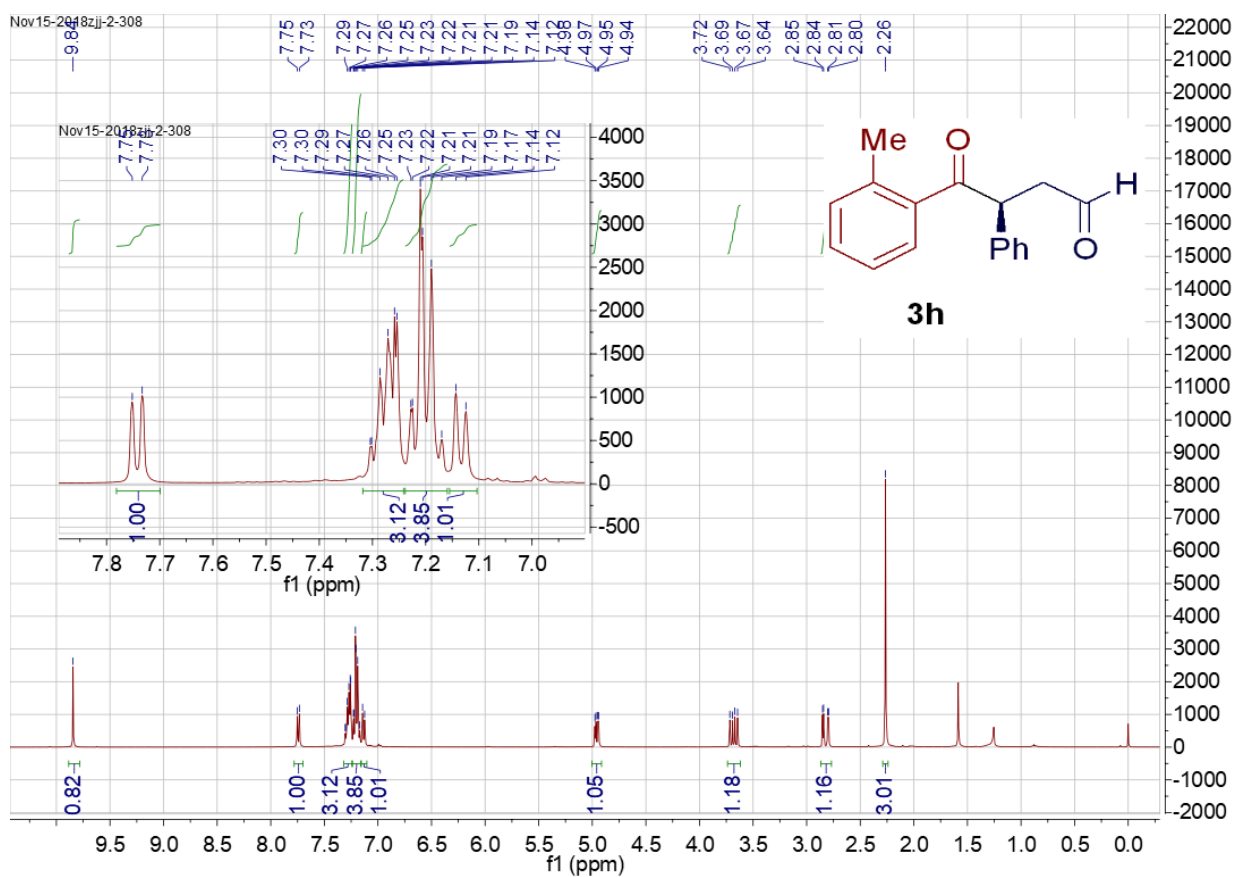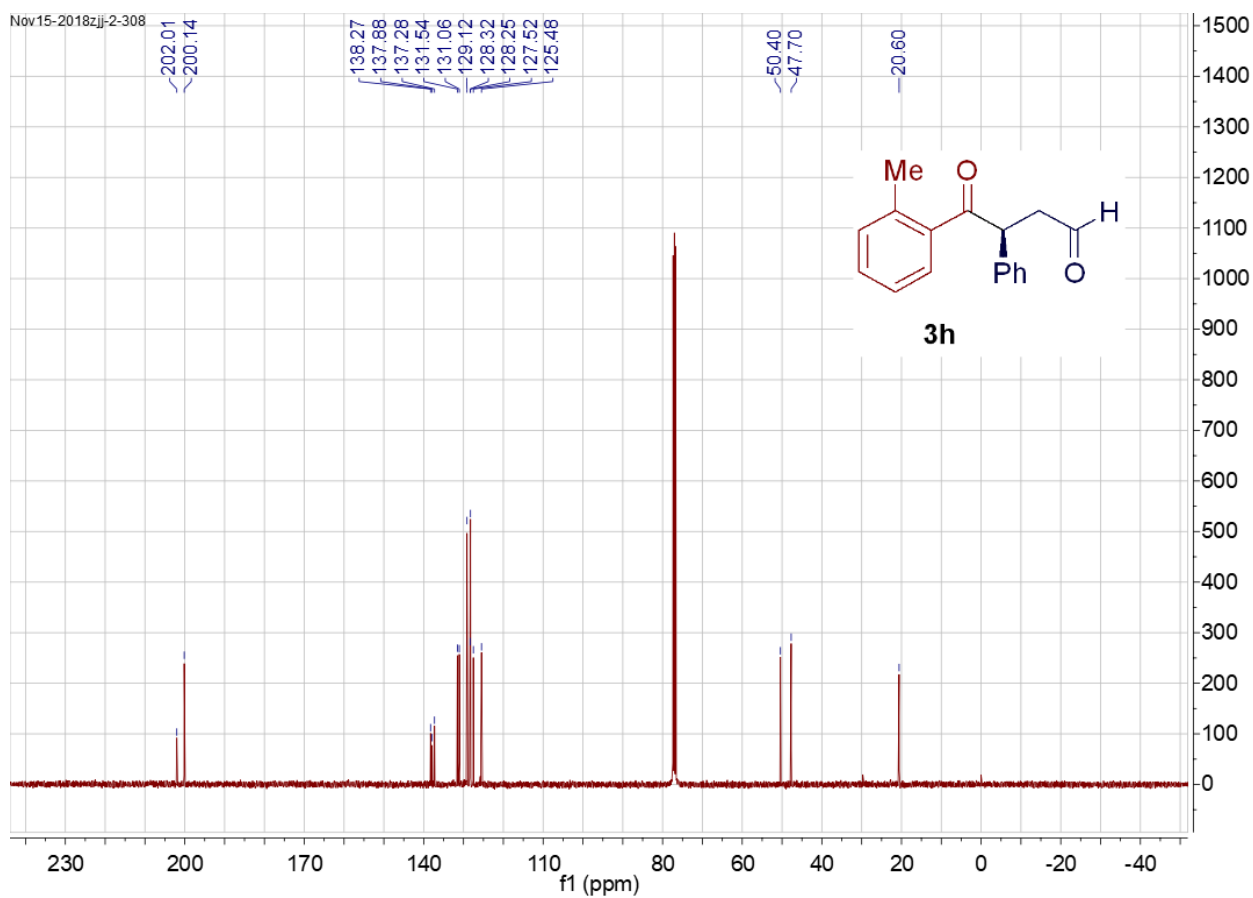

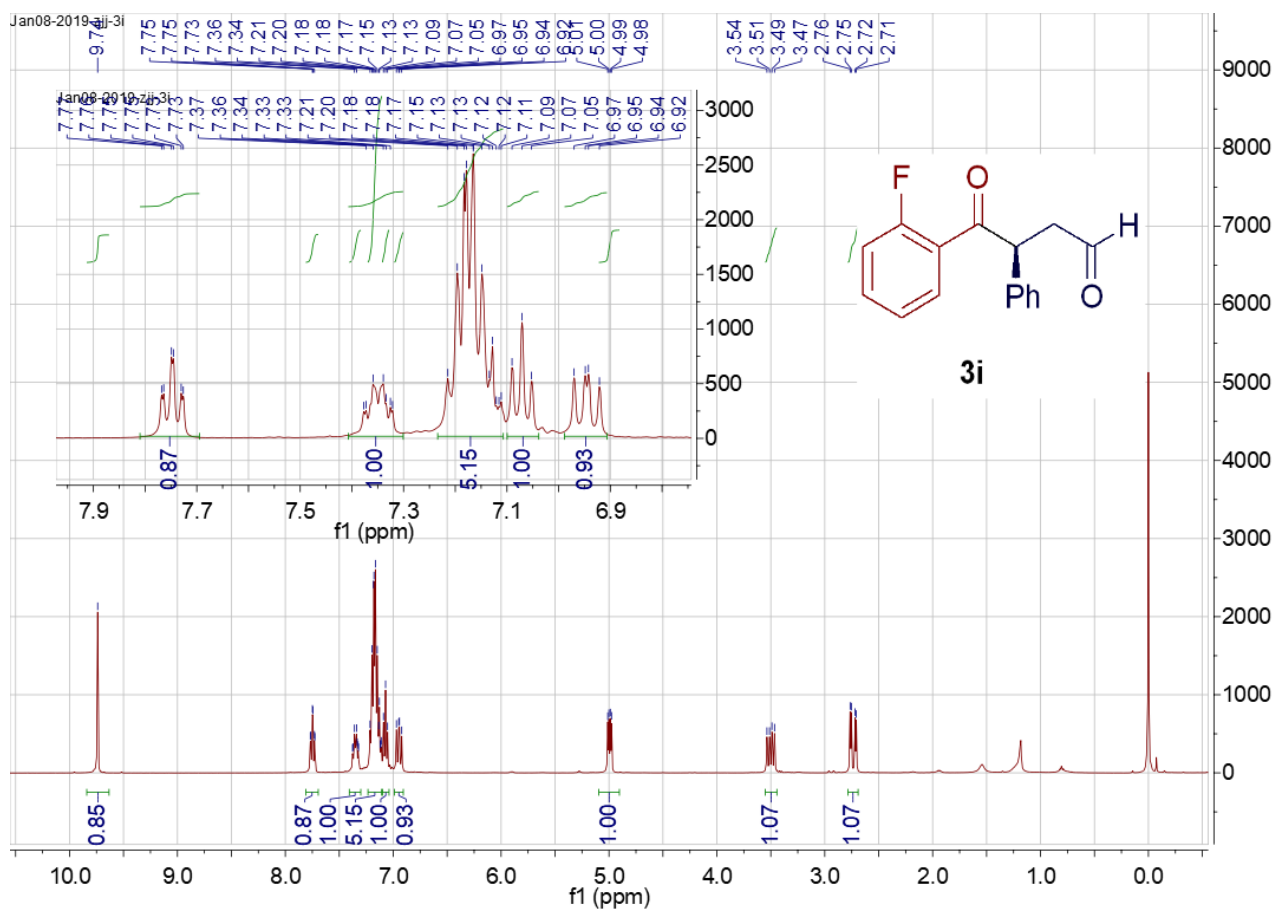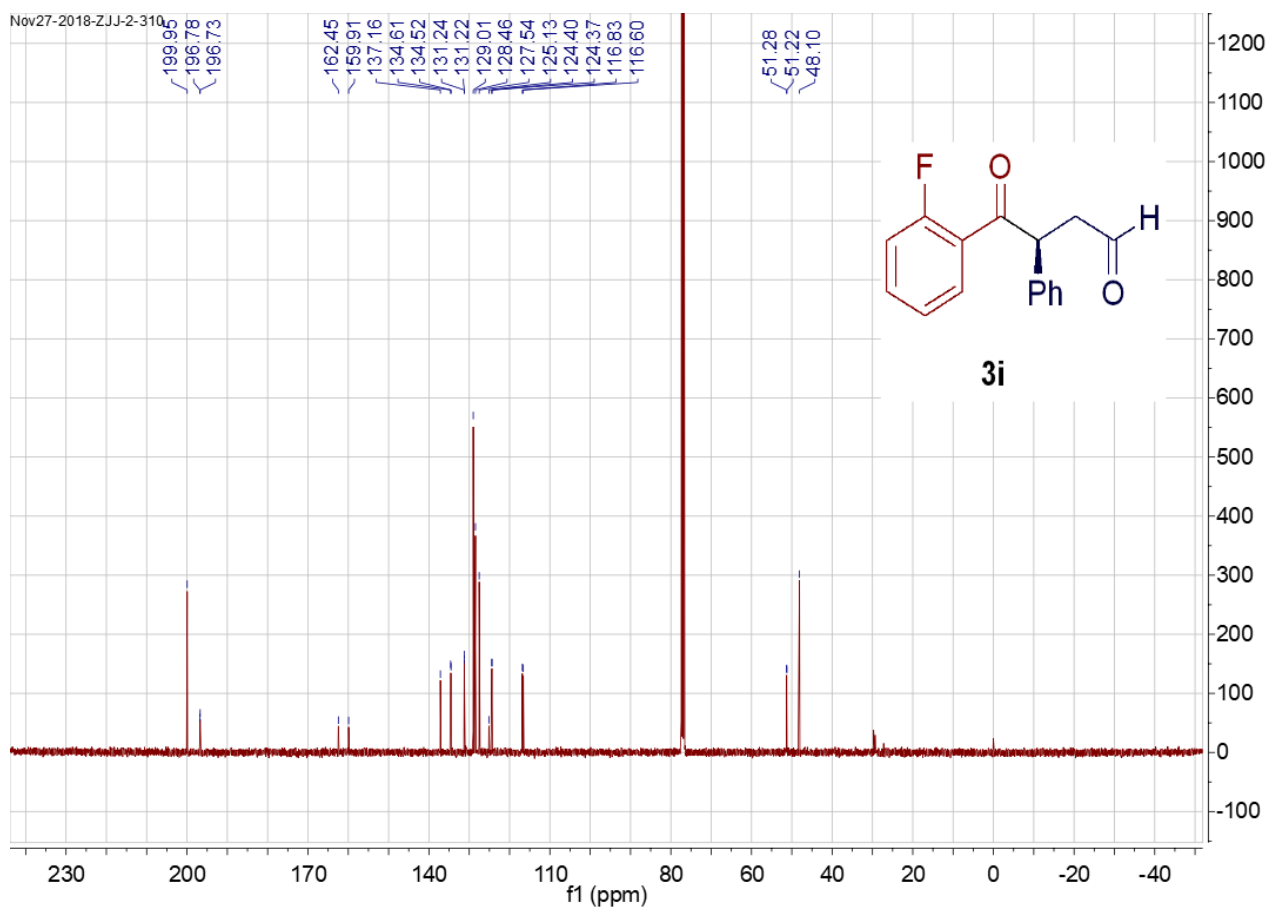

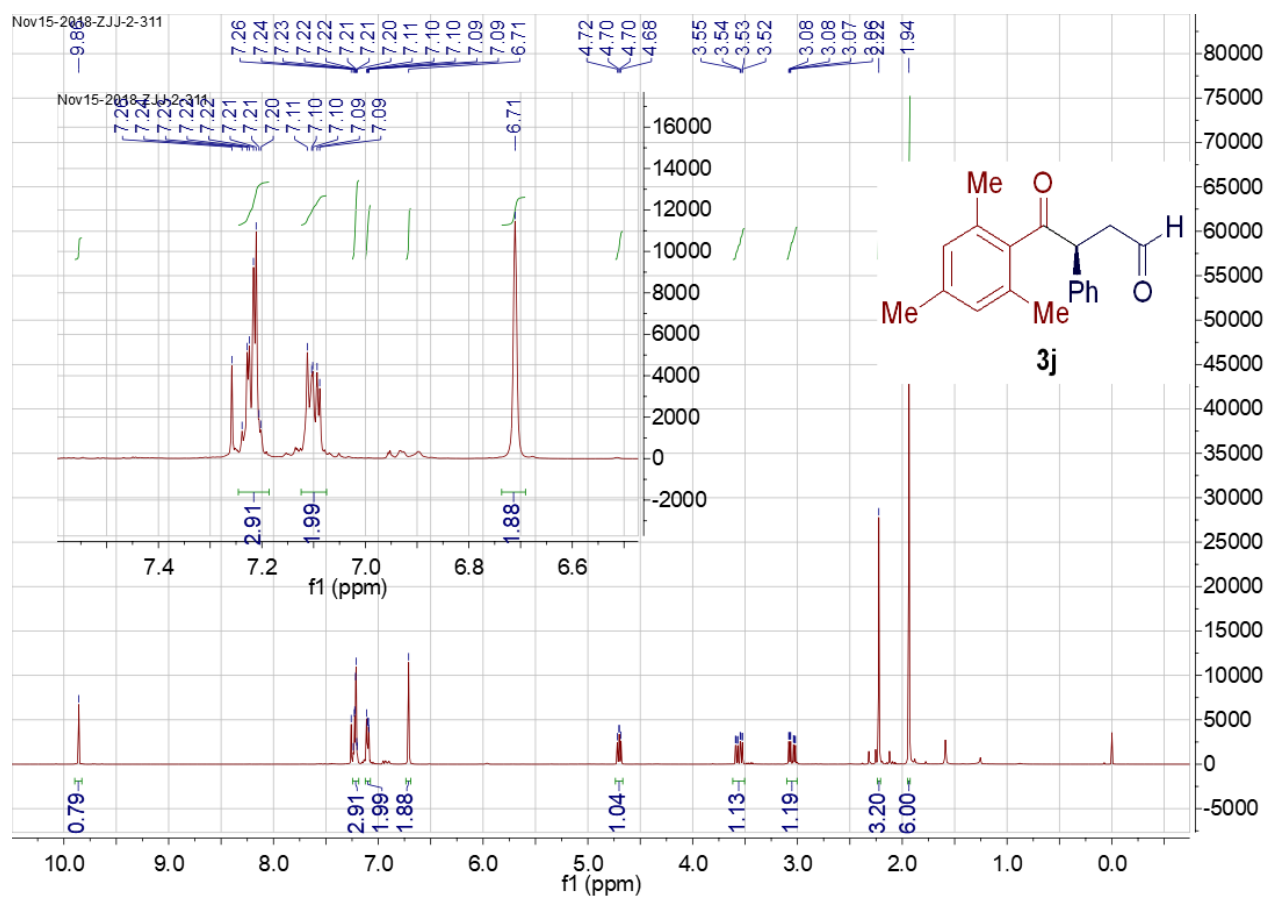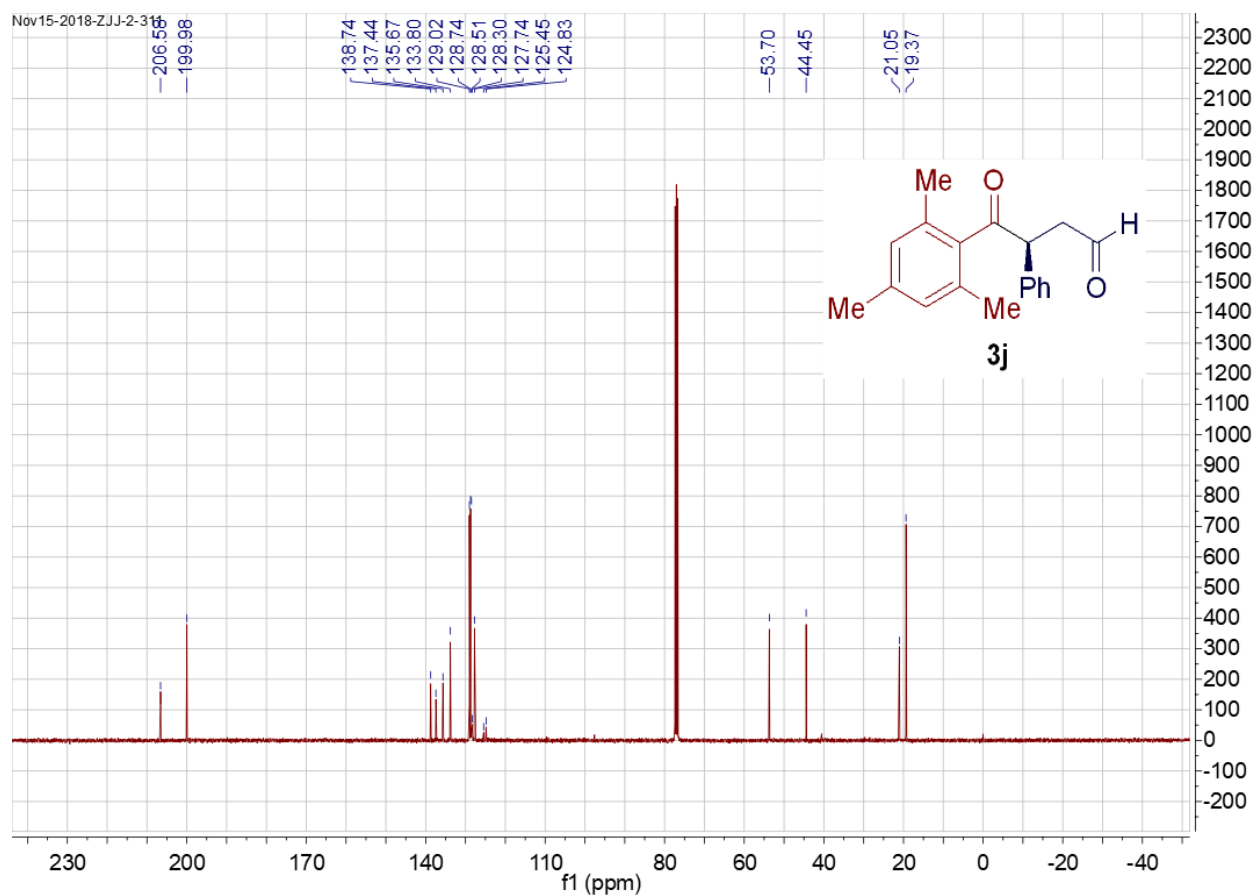

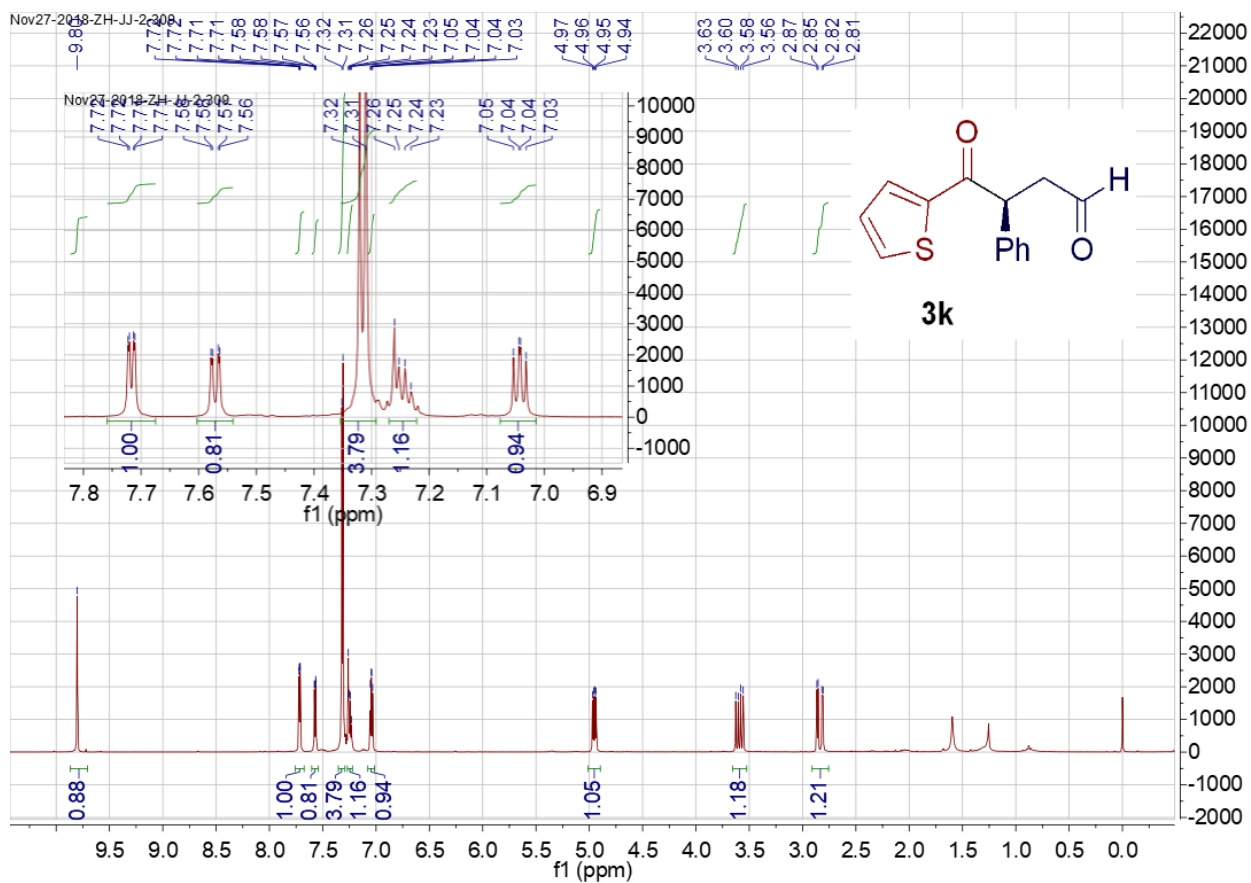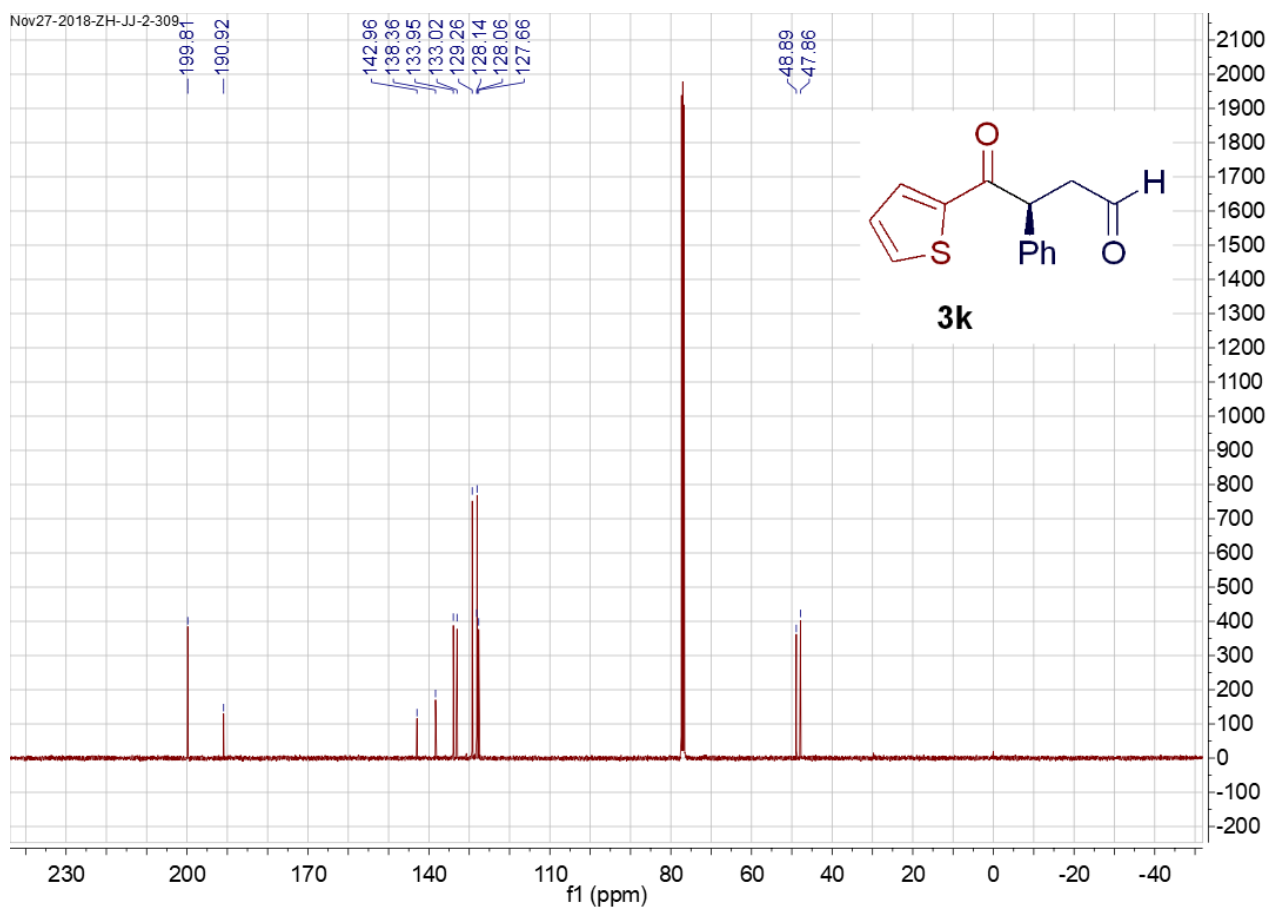

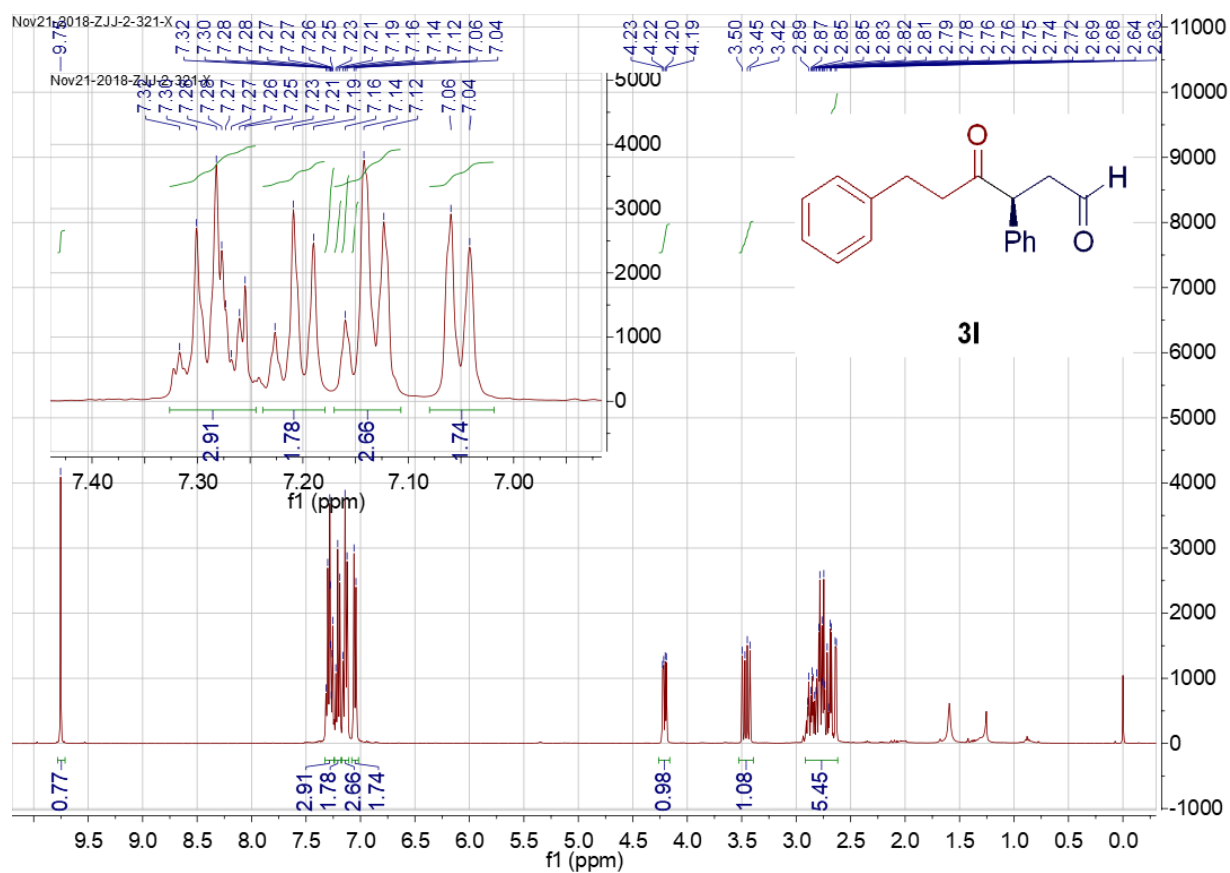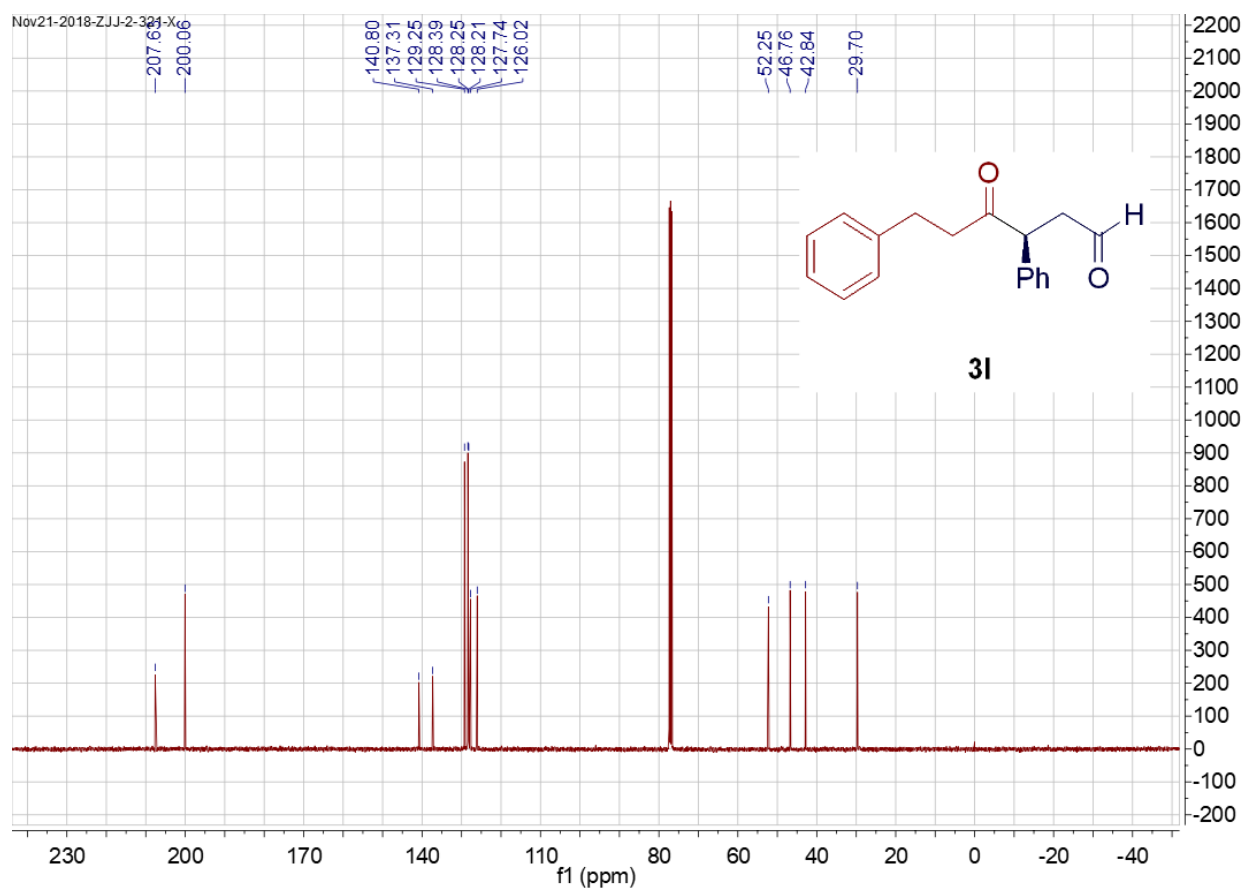

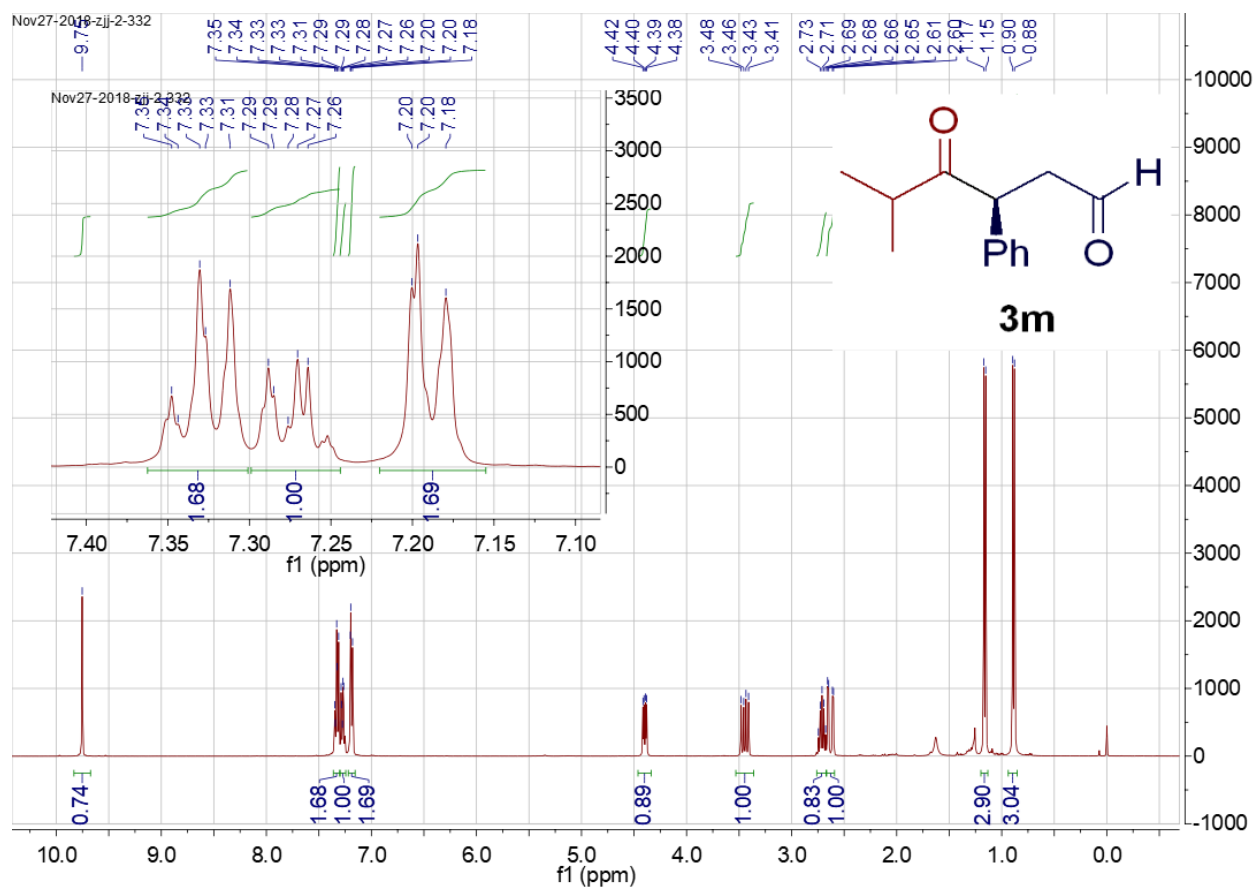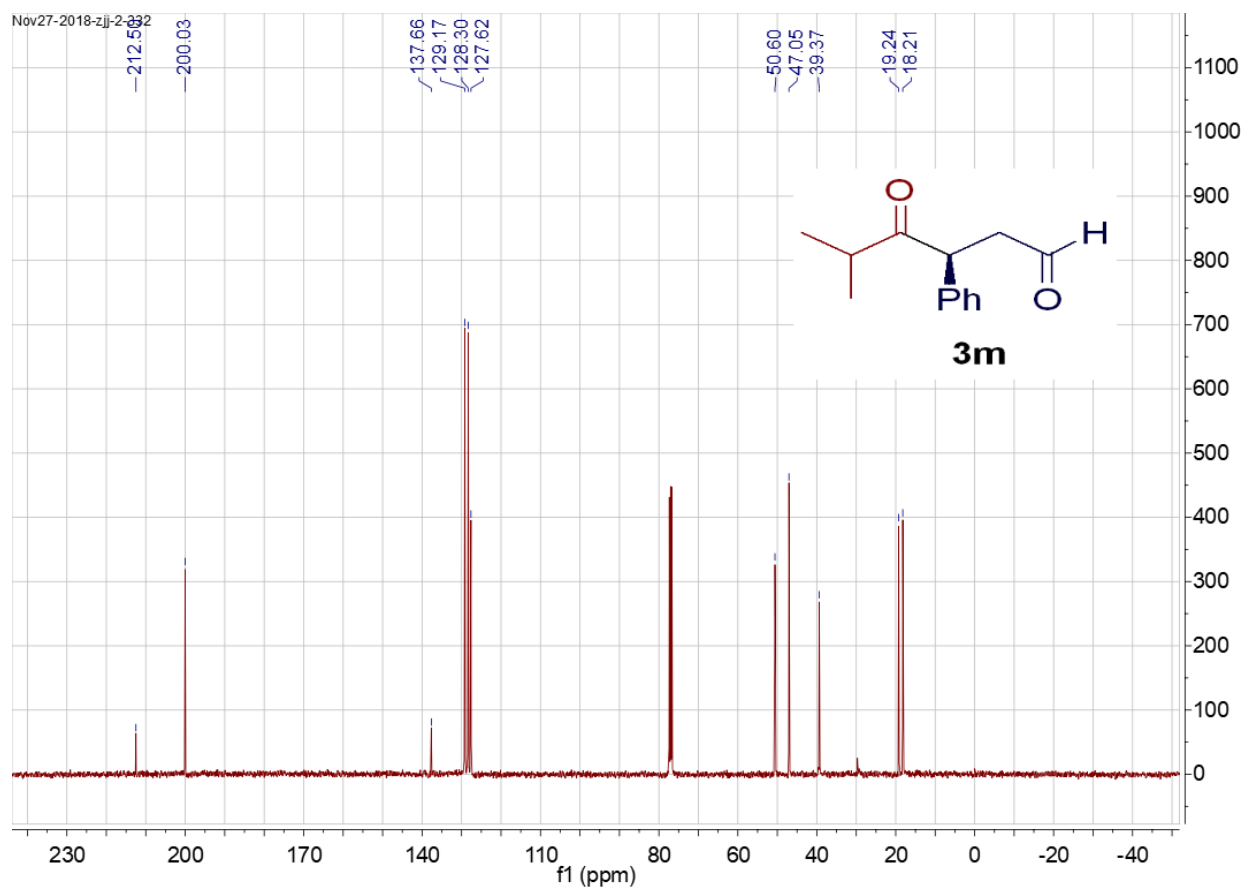

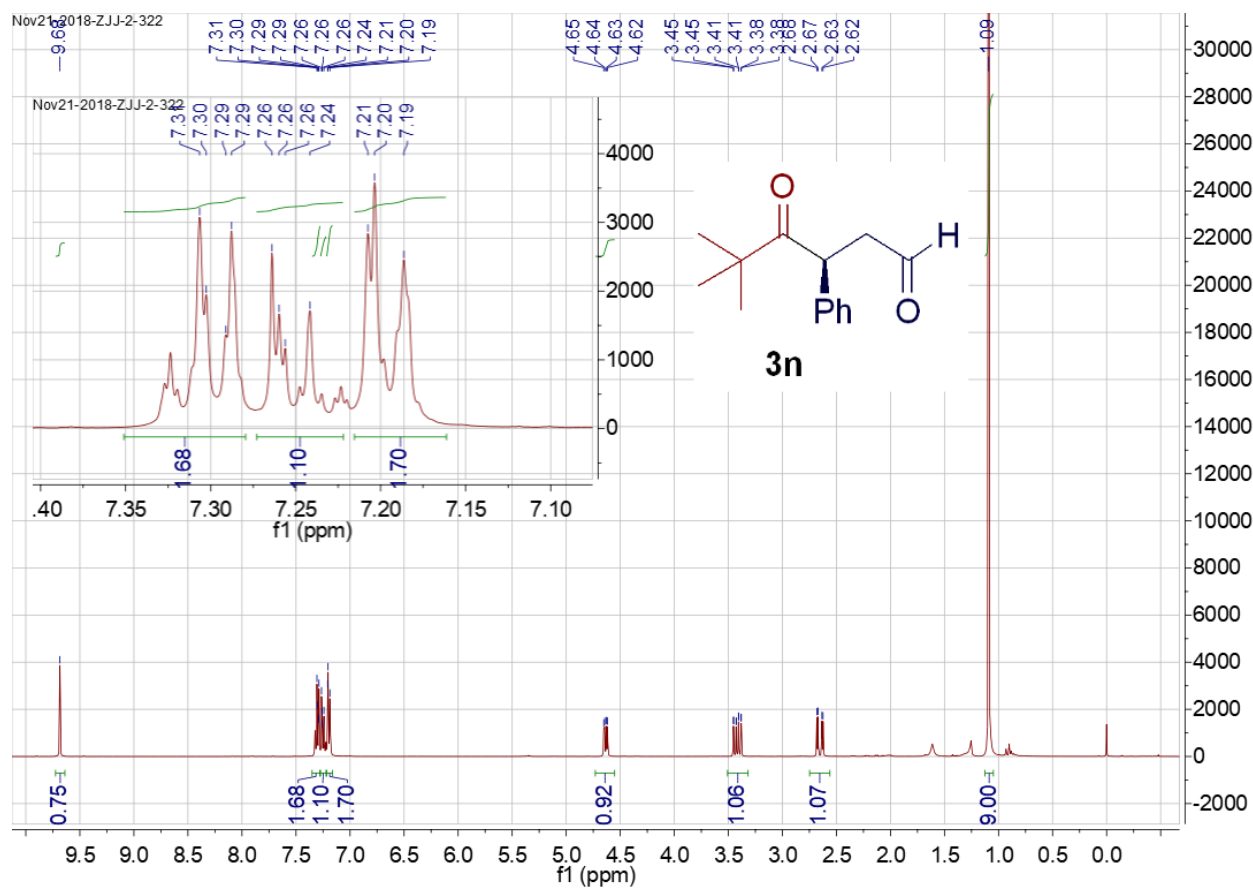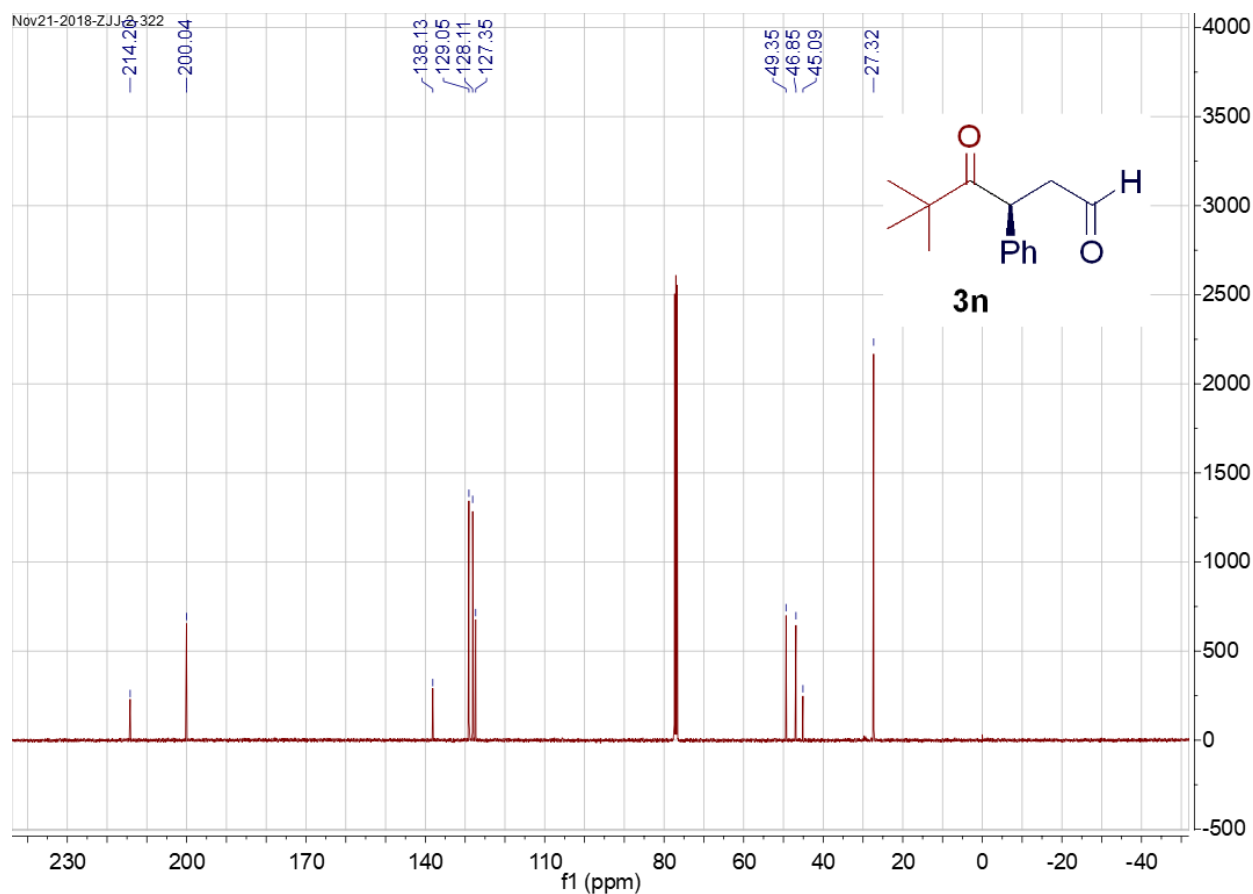



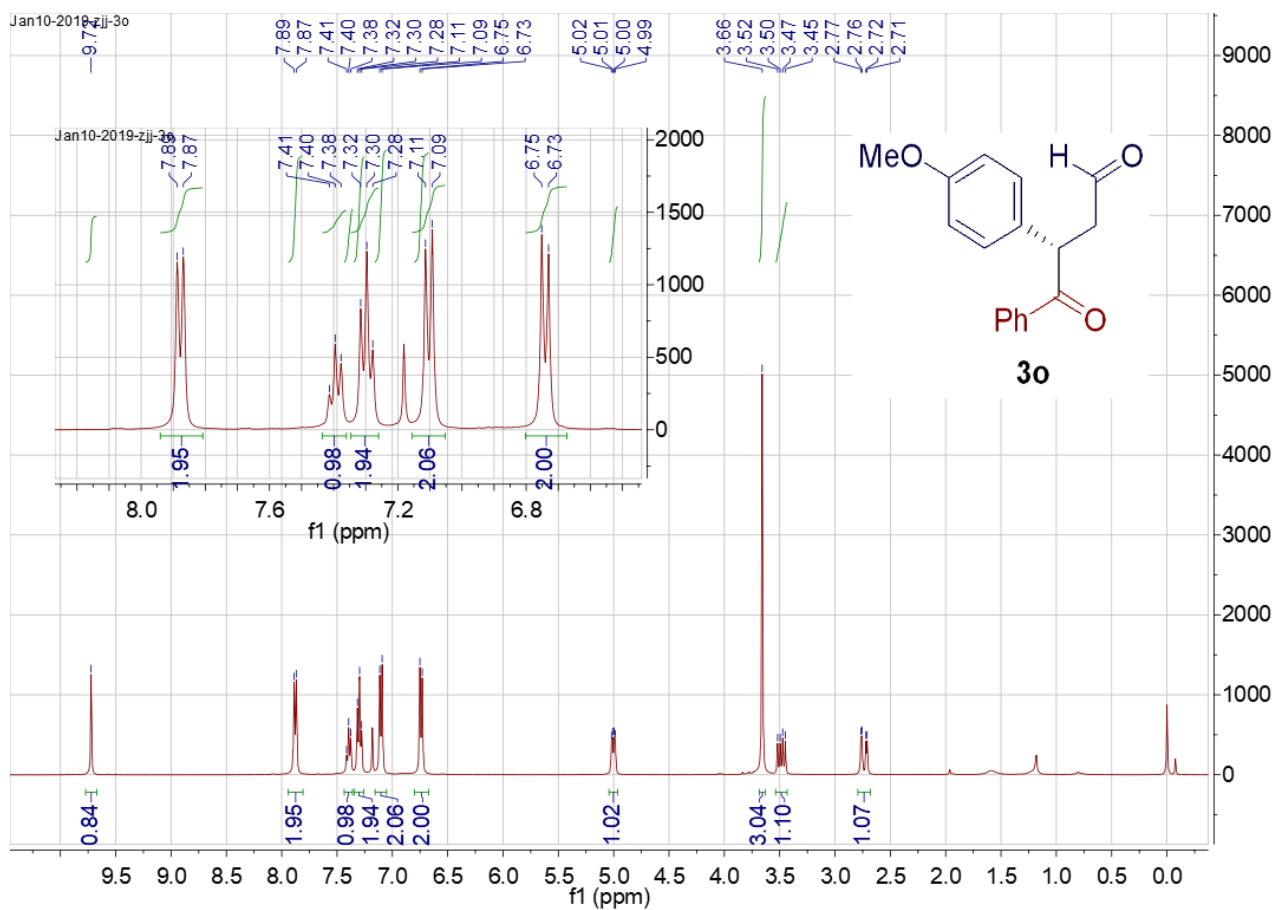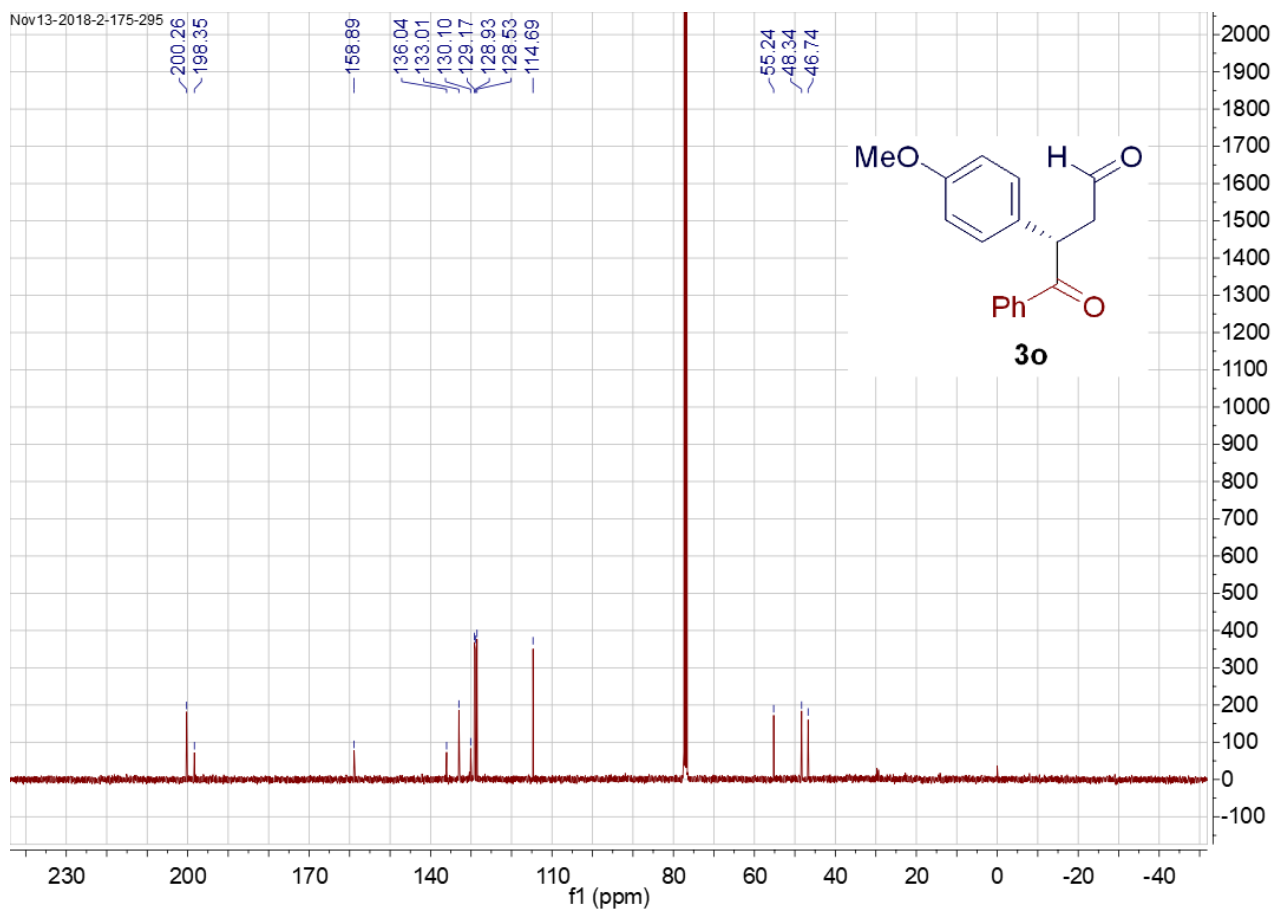

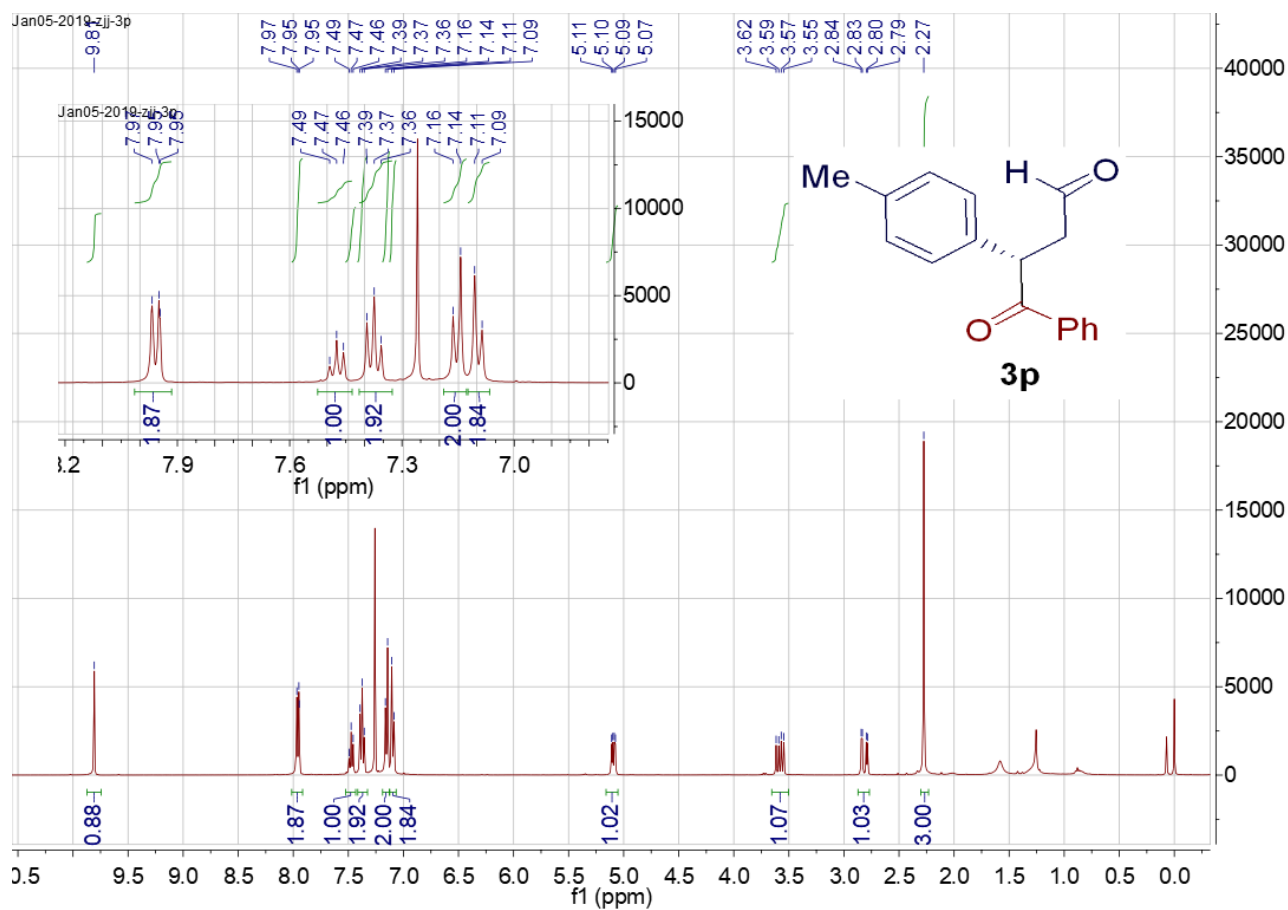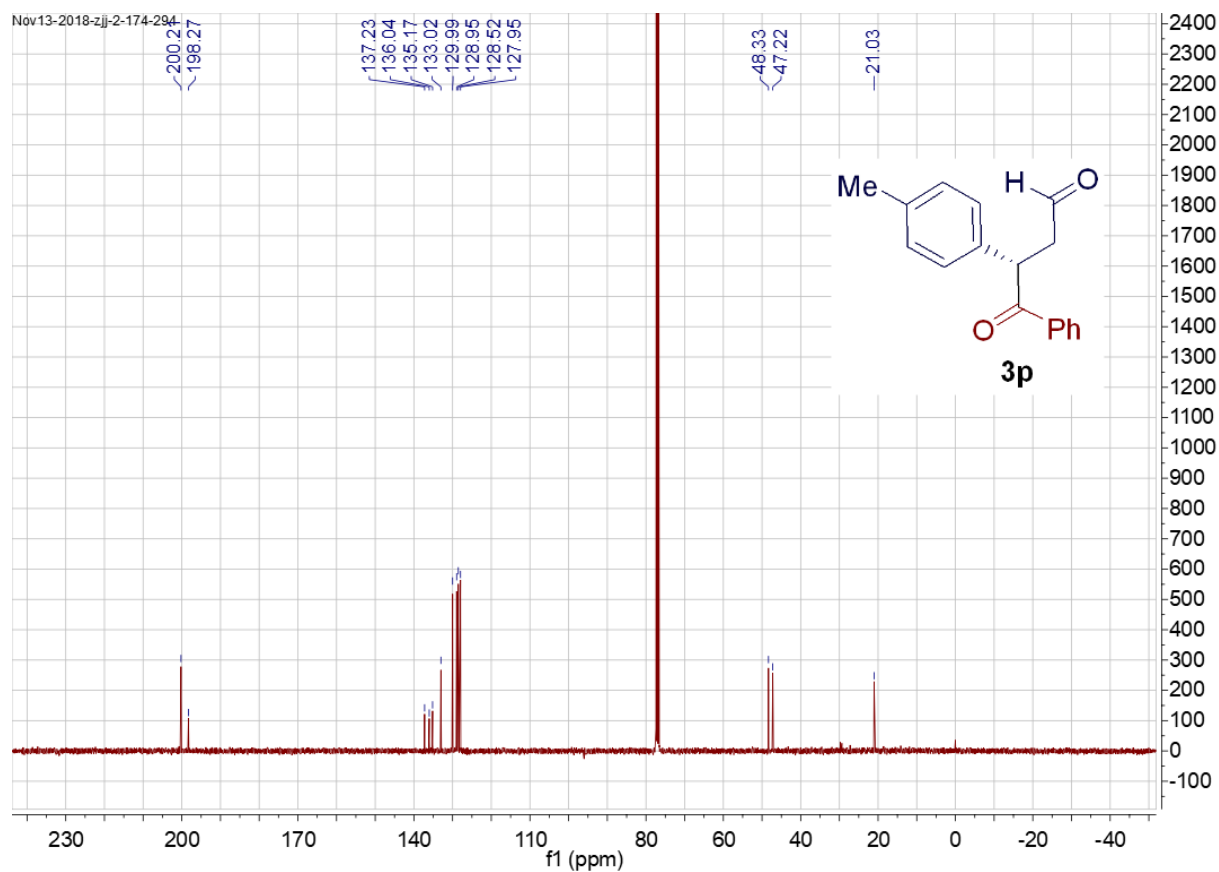

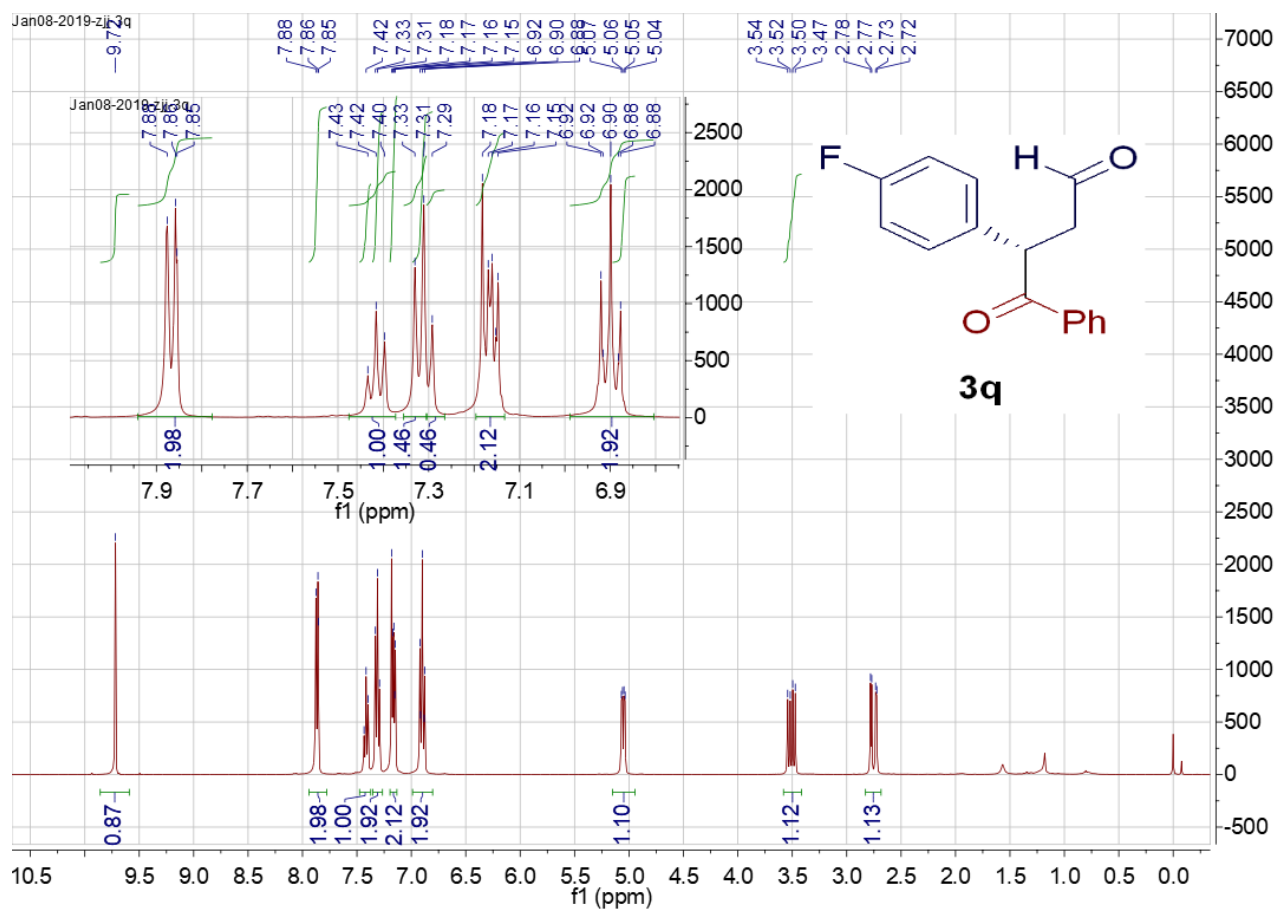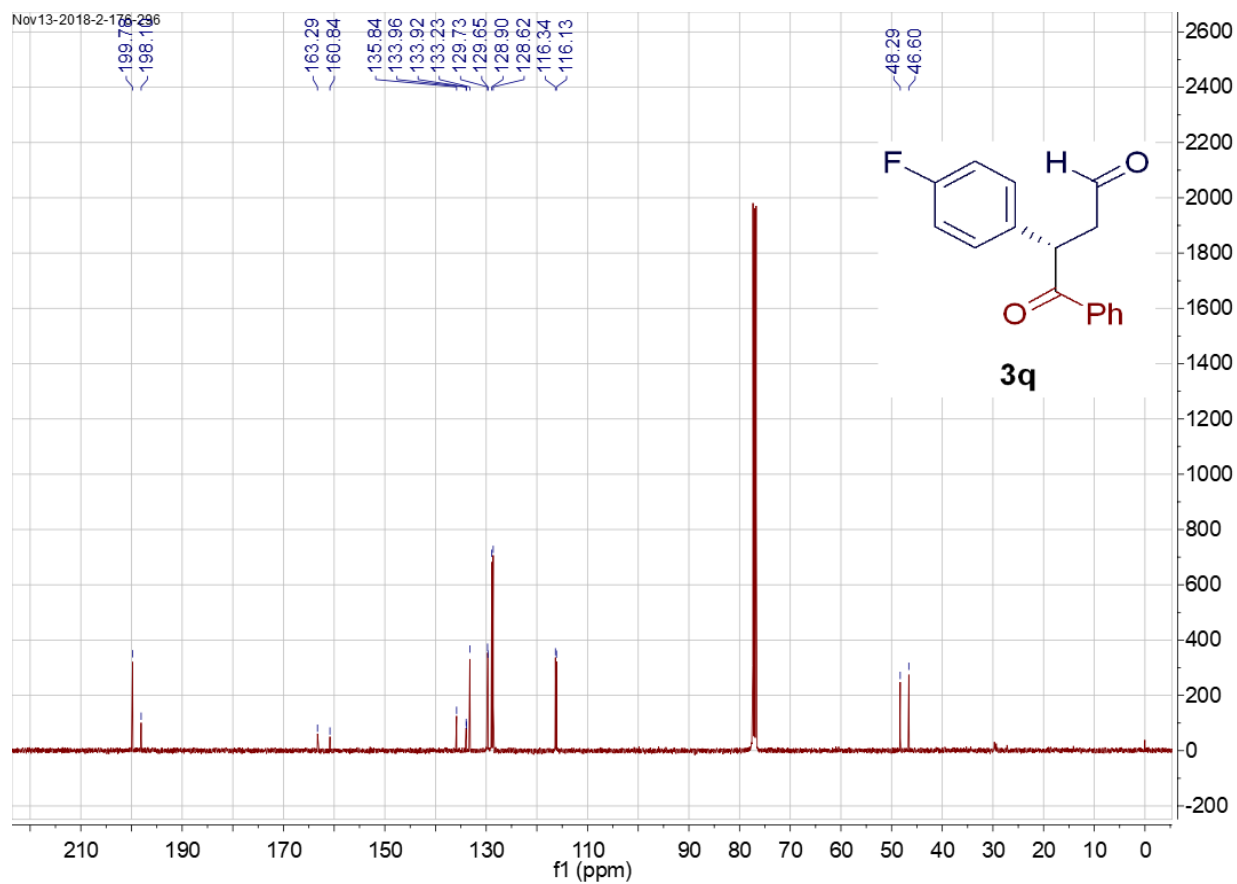

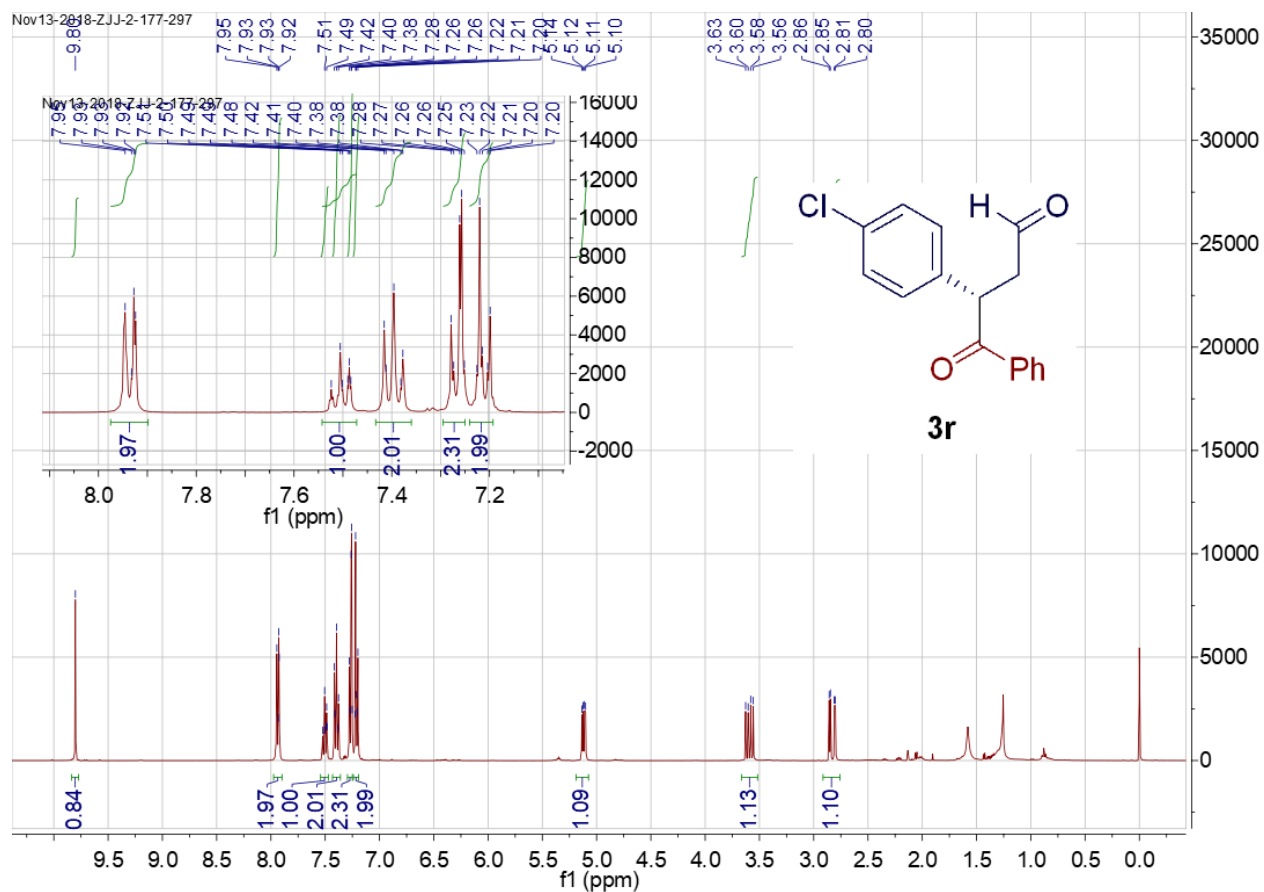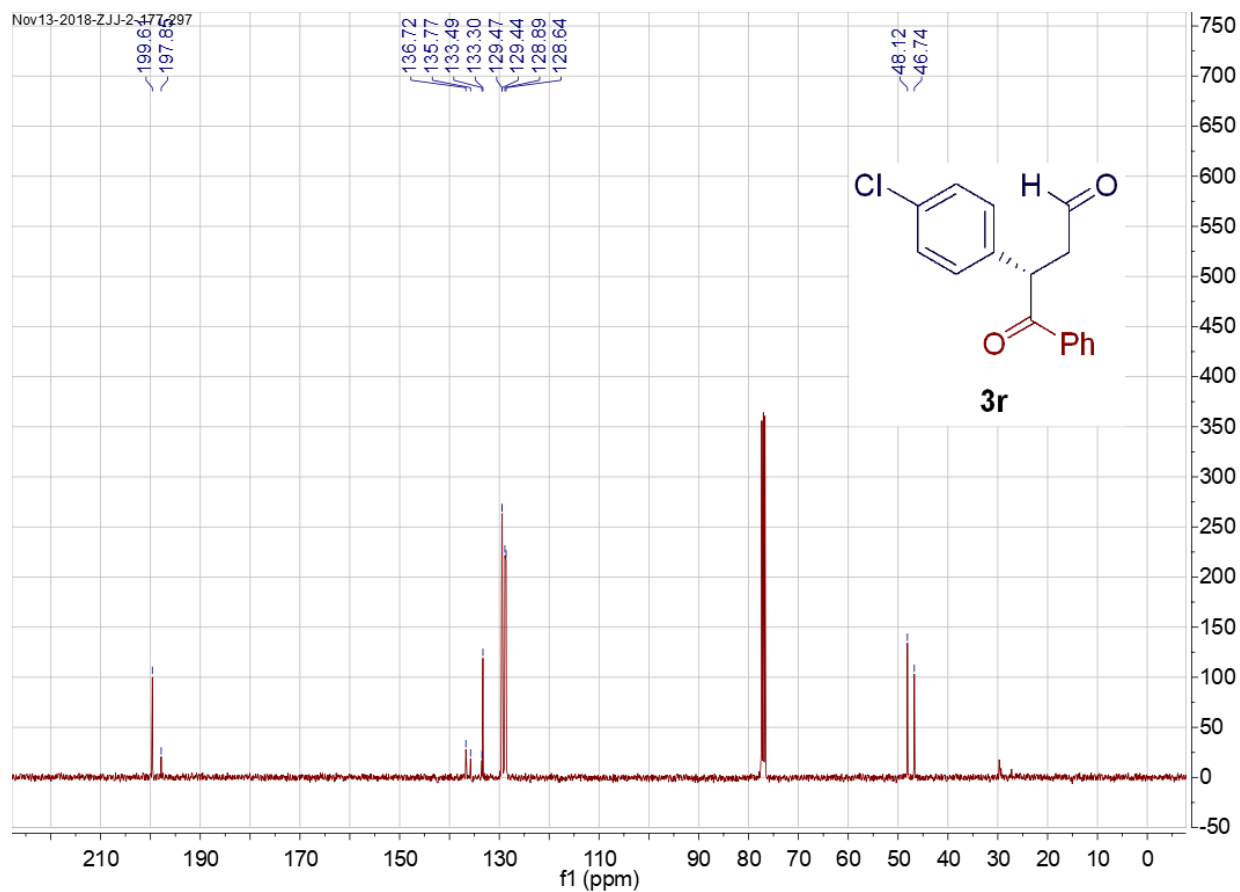

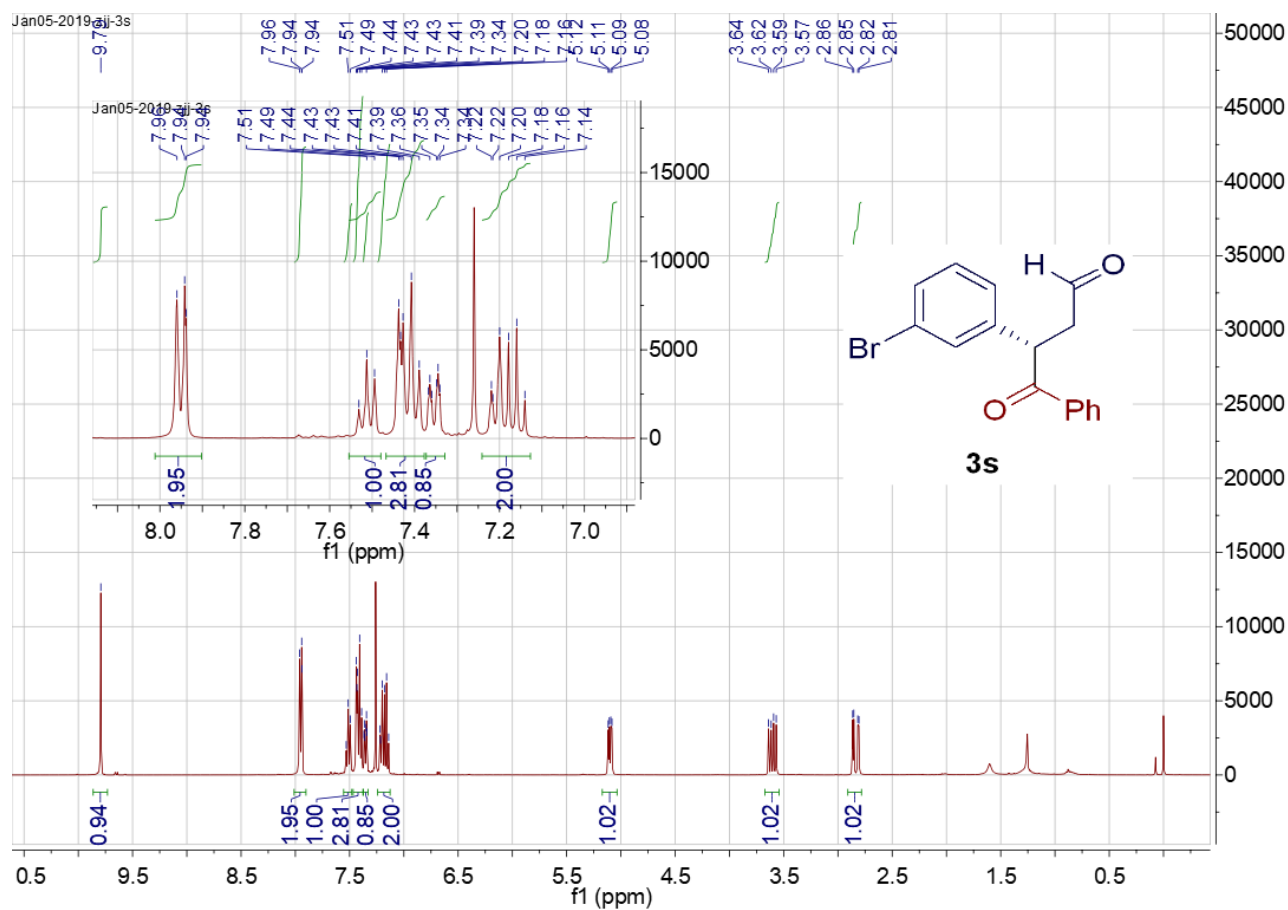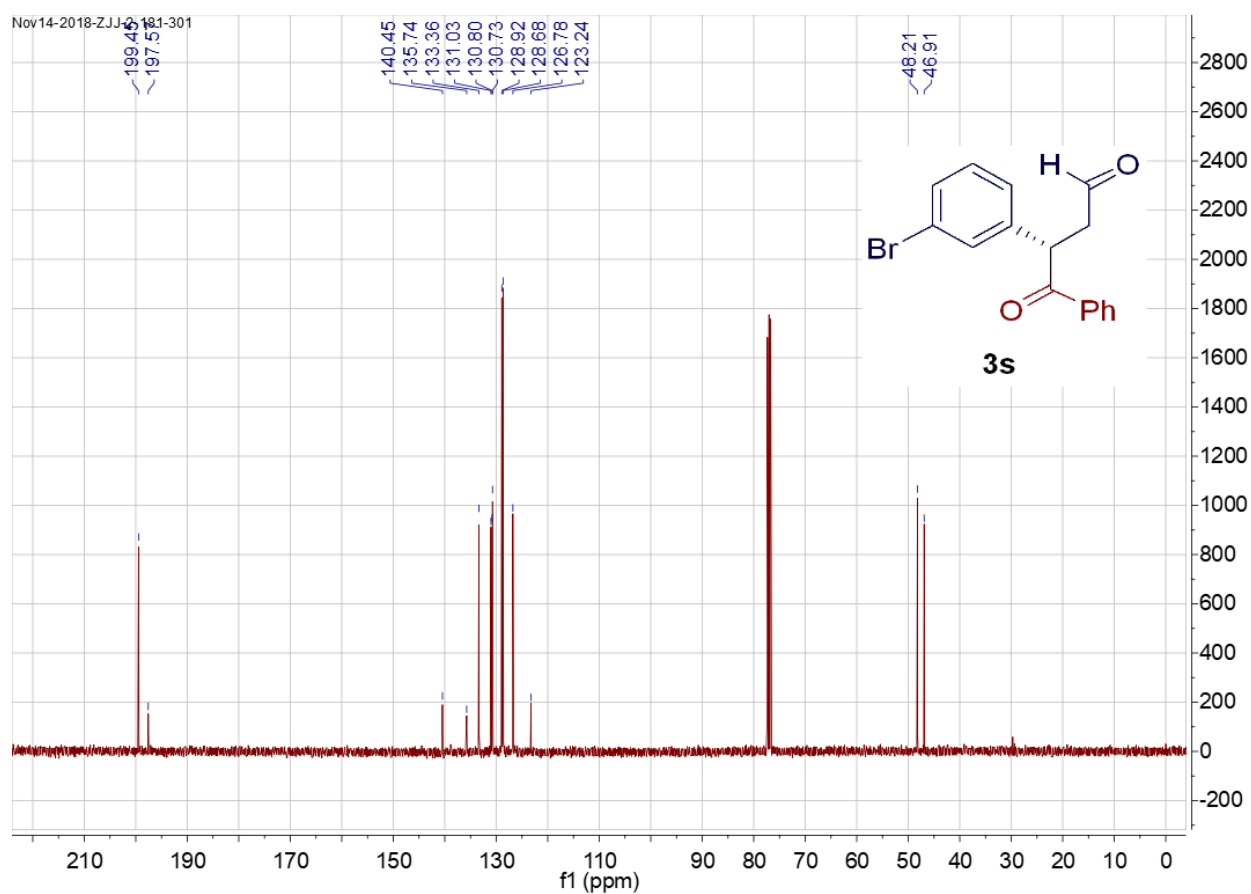

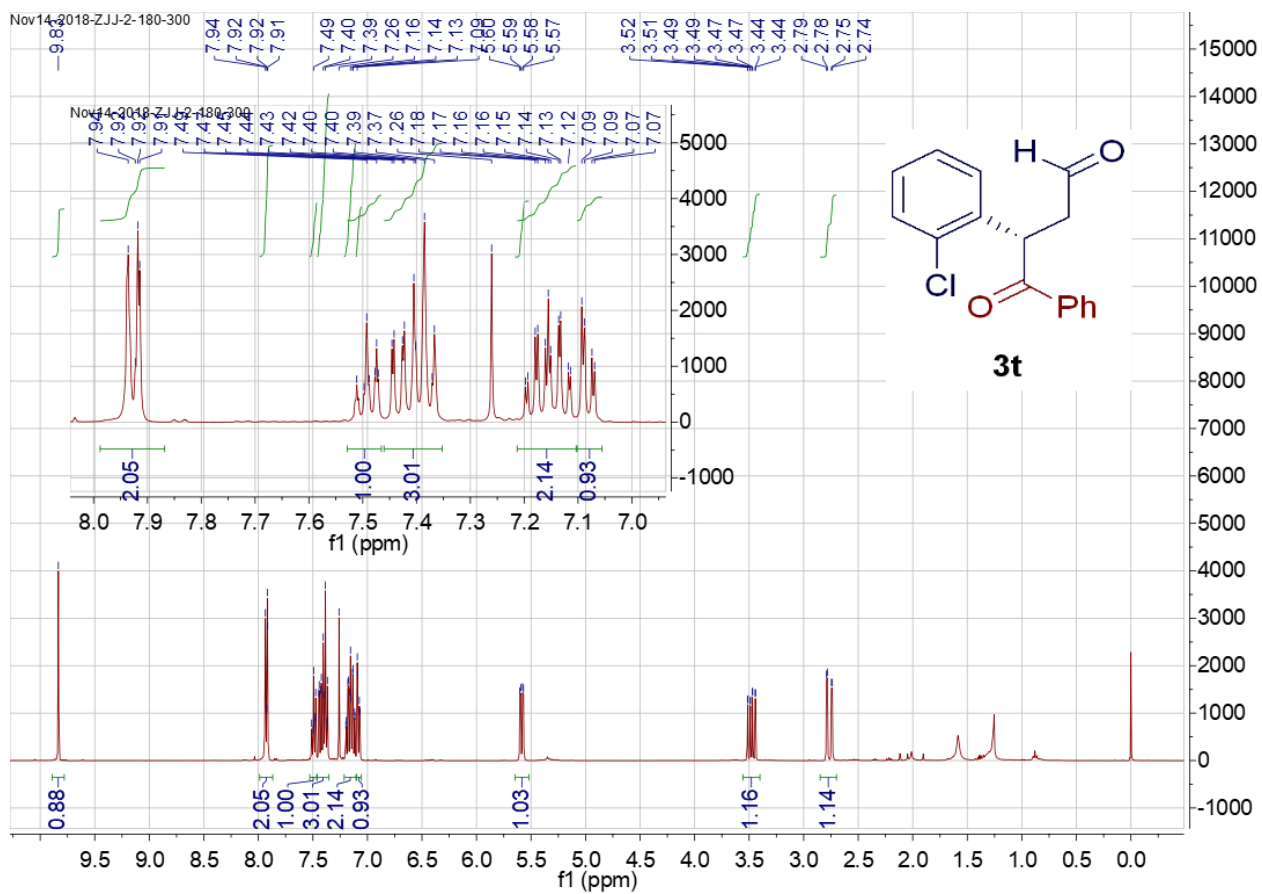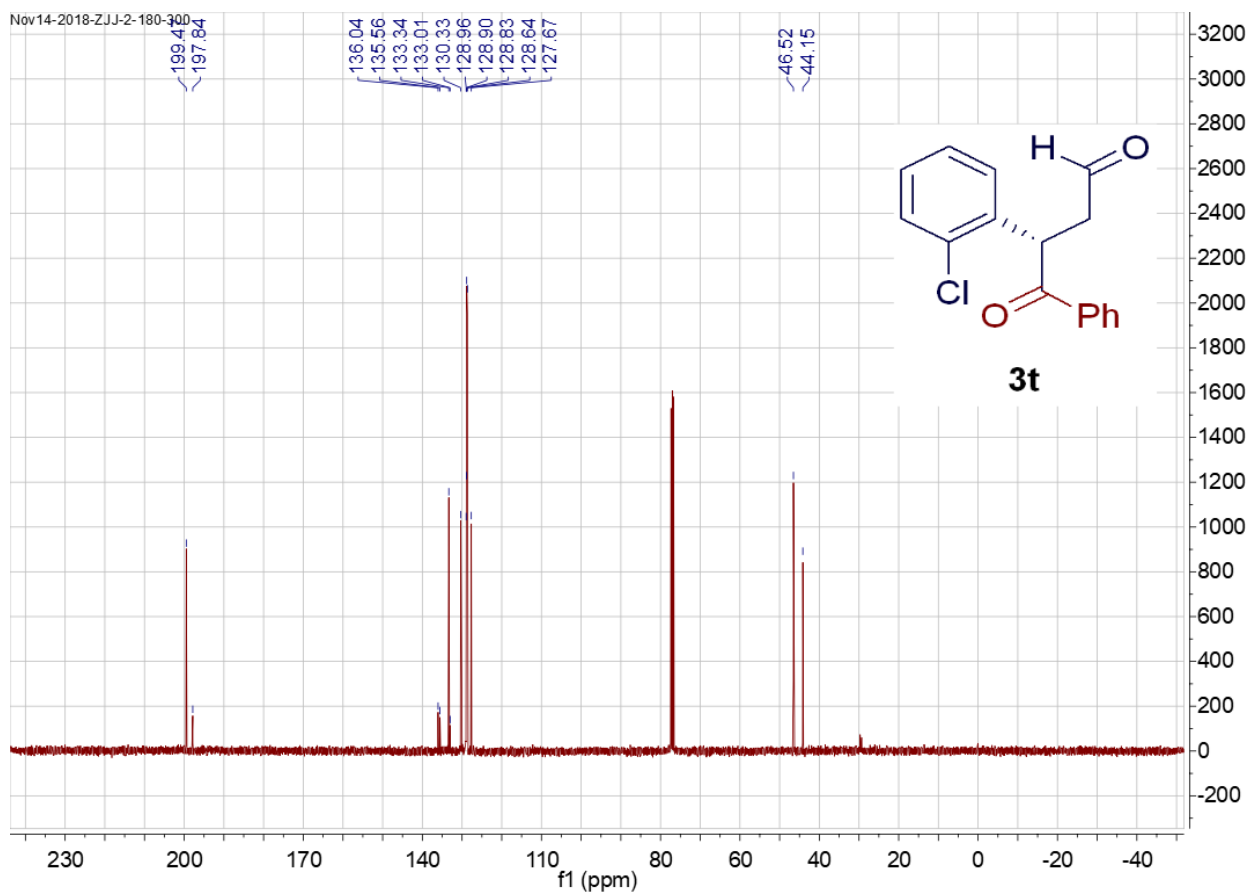

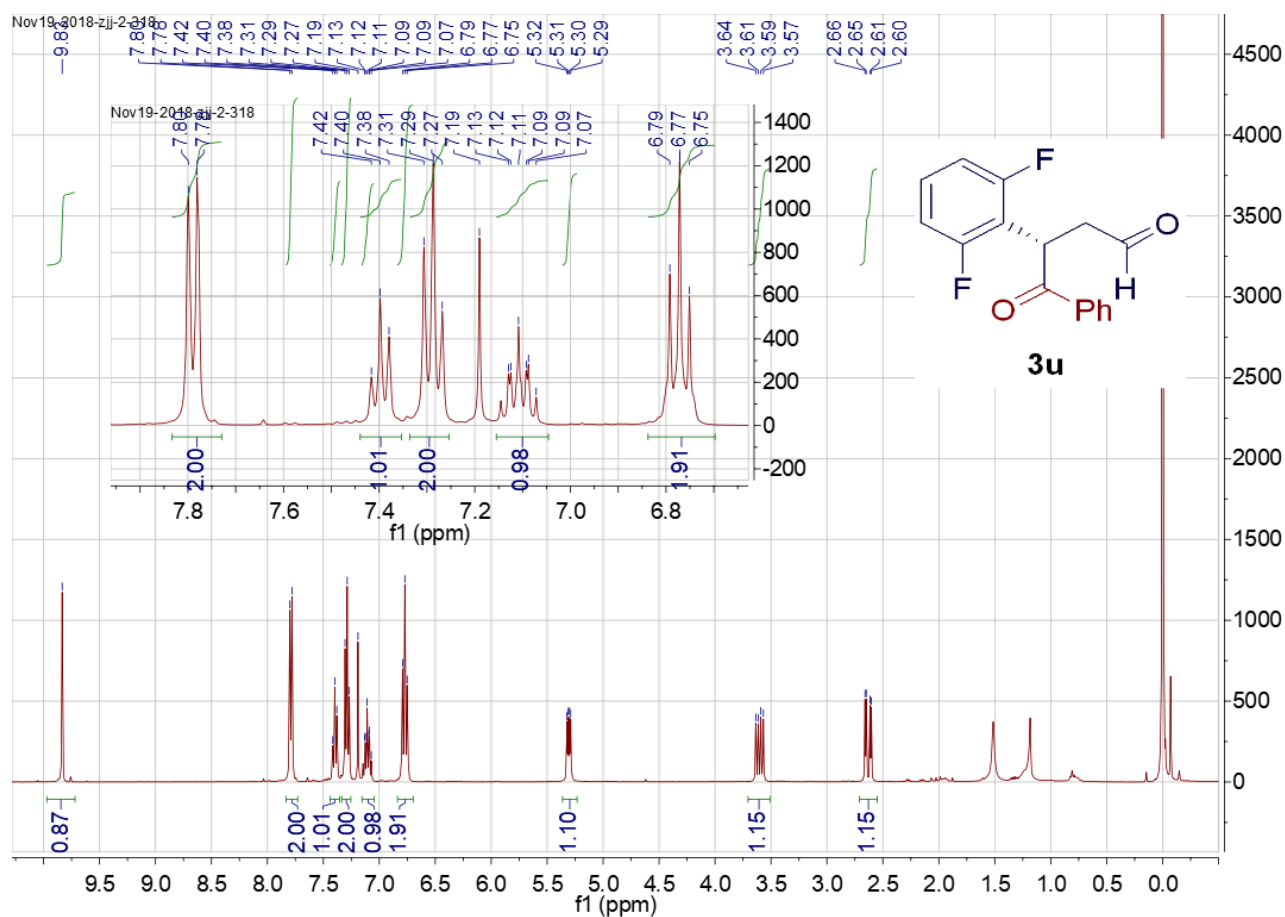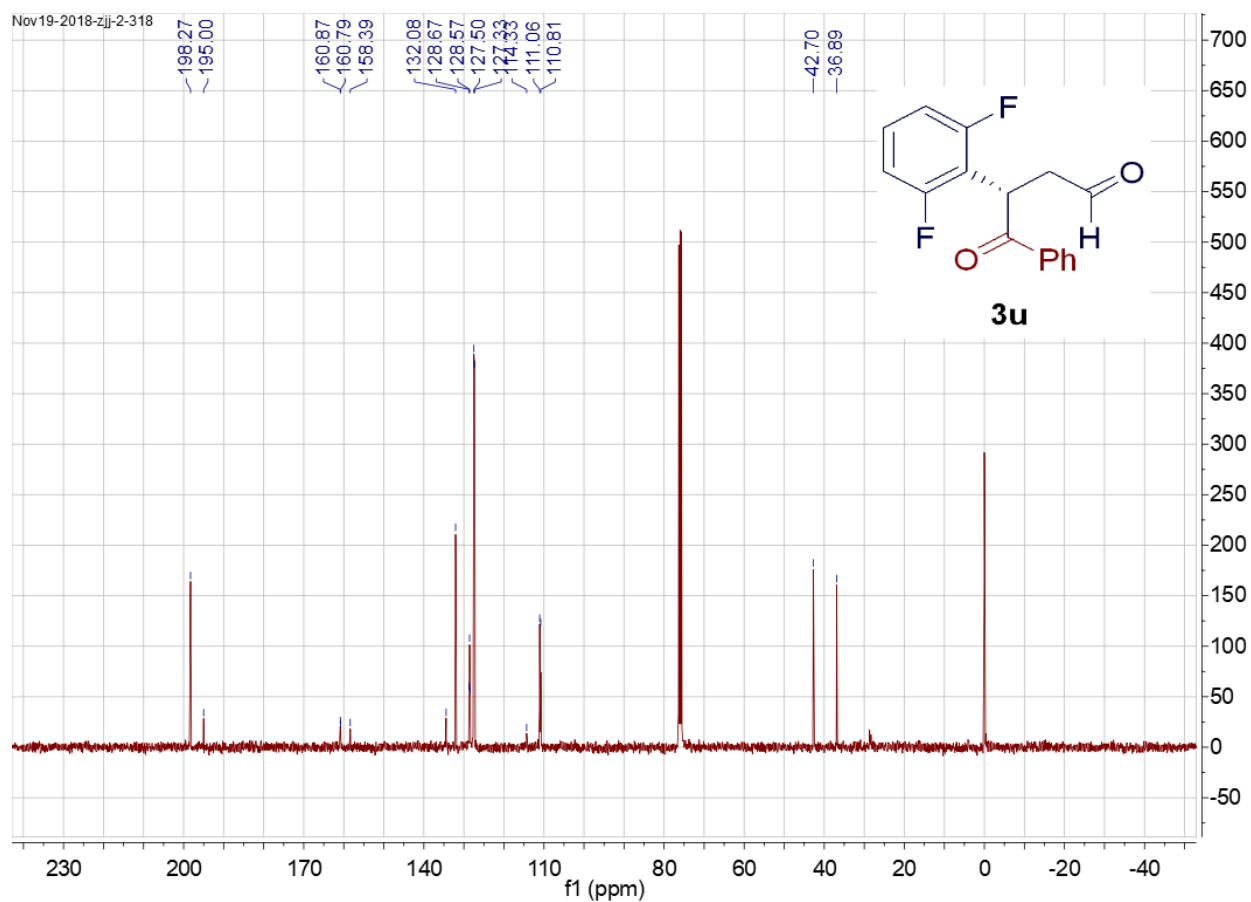

9. Chiral HPLC analyses of products 3

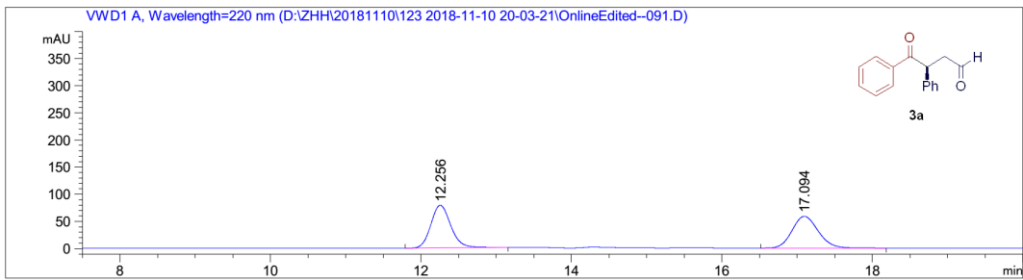

面积百分比报告

排序 : 信号  
乘积因子 : 1.0000  
稀释因子 : 1.0000  
内标中不使用乘积因子和稀释因子

| Retention Time                  |            |    | Area     |             | Height   | Relative Area |
|---------------------------------|------------|----|----------|-------------|----------|---------------|
| 信号 1: VWD1 A, Wavelength=220 nm |            |    |          |             |          |               |
| 峰 #                             | 保留时间 [min] | 类型 | 峰宽 [min] | 峰面积 [mAU*s] | 峰高 [mAU] | 峰面积 %         |
| 1                               | 12.256     | BB | 0.2844   | 1462.15808  | 78.84209 | 50.6316       |
| 2                               | 17.094     | BB | 0.3739   | 1425.68030  | 58.58331 | 49.3684       |

总量 : 2887.83838 137.42540

\*\*\* 报告结束 \*\*\*

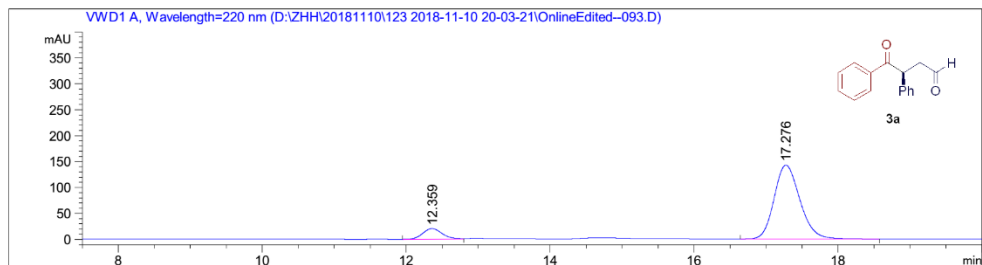

面积百分比报告

排序 : 信号  
乘积因子 : 1.0000  
稀释因子 : 1.0000  
内标中不使用乘积因子和稀释因子

信号 1: VWD1 A, Wavelength=220 nm

| 峰 # | 保留时间 [min] | 类型 | 峰宽 [min] | 峰面积 [mAU*s] | 峰高 [mAU]  | 峰面积 %   |
|-----|------------|----|----------|-------------|-----------|---------|
| 1   | 12.359     | BV | 0.2937   | 392.45886   | 20.65601  | 9.9715  |
| 2   | 17.276     | BB | 0.3864   | 3543.35962  | 142.37236 | 90.0285 |

总量 : 3935.81848 163.02837

\*\*\* 报告结束 \*\*\*



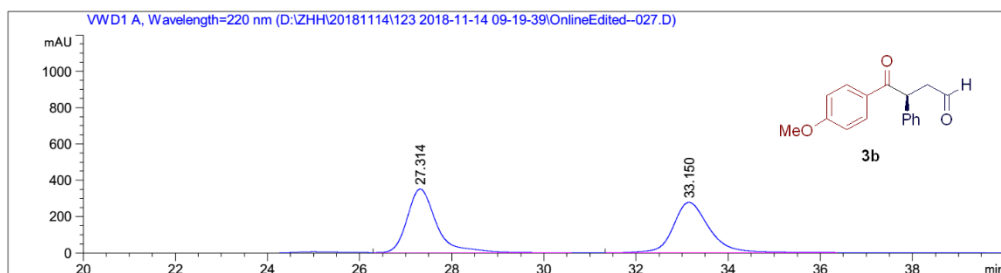

面积百分比报告

排序 : 信号  
 乘积因子 : 1.0000  
 稀释因子 : 1.0000  
 内标中不使用乘积因子和稀释因子

信号 1: VWD1 A, Wavelength=220 nm

| 峰 # | 保留时间 [min] | 类型 | 峰宽 [min] | 峰面积 [mAU*s] | 峰高 [mAU]  | 峰面积 %   |
|-----|------------|----|----------|-------------|-----------|---------|
| 1   | 27.314     | VB | 0.6784   | 1.58108e4   | 351.77167 | 51.2376 |
| 2   | 33.150     | BB | 0.8103   | 1.50469e4   | 277.17560 | 48.7624 |

总量 : 3.08577e4 628.94727

\*\*\* 报告结束 \*\*\*

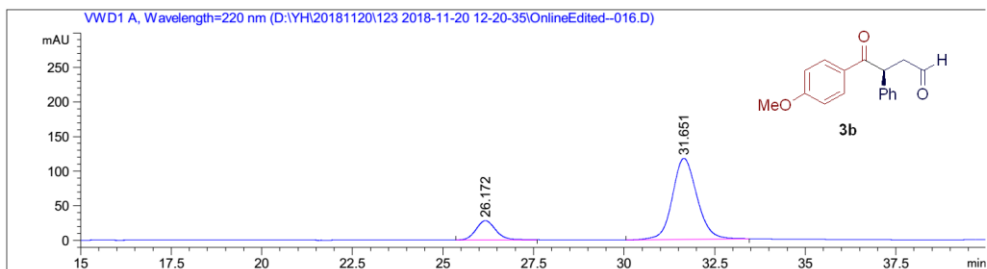

面积百分比报告

排序 : 信号  
 乘积因子 : 1.0000  
 稀释因子 : 1.0000  
 内标中不使用乘积因子和稀释因子

信号 1: VWD1 A, Wavelength=220 nm

| 峰 # | 保留时间 [min] | 类型 | 峰宽 [min] | 峰面积 [mAU*s] | 峰高 [mAU]  | 峰面积 %   |
|-----|------------|----|----------|-------------|-----------|---------|
| 1   | 26.172     | BB | 0.5793   | 1060.62500  | 27.85097  | 16.0627 |
| 2   | 31.651     | BB | 0.7081   | 5542.40625  | 117.33327 | 83.9373 |

总量 : 6603.03125 145.18425

\*\*\* 报告结束 \*\*\*

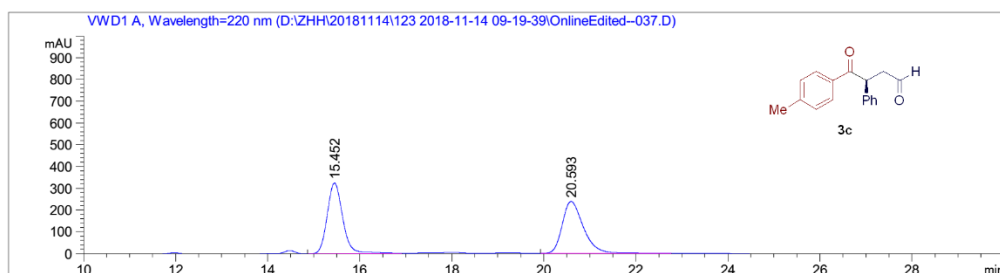

面积百分比报告

排序 : 信号  
 乘积因子 : 1.0000  
 稀释因子 : 1.0000  
 内标中不使用乘积因子和稀释因子

信号 1: VWD1 A, Wavelength=220 nm

| 峰 # | 保留时间 [min] | 类型 | 峰宽 [min] | 峰面积 [mAU*s] | 峰高 [mAU]  | 峰面积 %   |
|-----|------------|----|----------|-------------|-----------|---------|
| 1   | 15.452     | VB | 0.3621   | 7602.43799  | 324.74649 | 49.9229 |
| 2   | 20.593     | VB | 0.4837   | 7625.90967  | 238.72430 | 50.0771 |

总量 : 1.52283e4 563.47079

\*\*\* 报告结束 \*\*\*

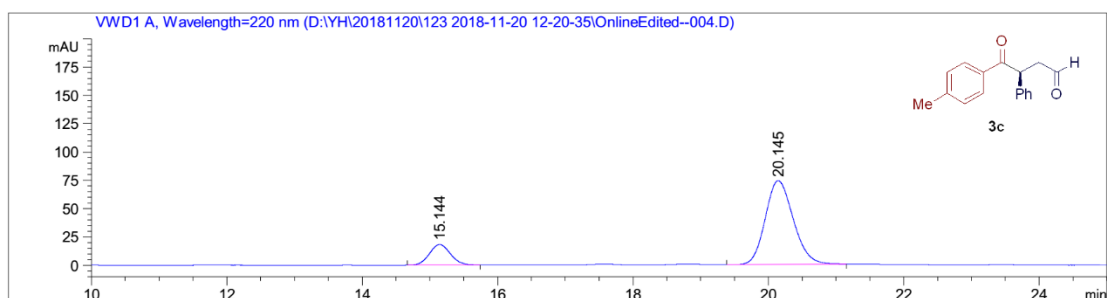

面积百分比报告

排序 : 信号  
 乘积因子 : 1.0000  
 稀释因子 : 1.0000  
 内标中不使用乘积因子和稀释因子

信号 1: VWD1 A, Wavelength=220 nm

| 峰 # | 保留时间 [min] | 类型 | 峰宽 [min] | 峰面积 [mAU*s] | 峰高 [mAU] | 峰面积 %   |
|-----|------------|----|----------|-------------|----------|---------|
| 1   | 15.144     | BB | 0.3339   | 393.45355   | 18.15154 | 15.6096 |
| 2   | 20.145     | VB | 0.4454   | 2127.13281  | 73.98449 | 84.3904 |

总量 : 2520.58636 92.13603

\*\*\* 报告结束 \*\*\*

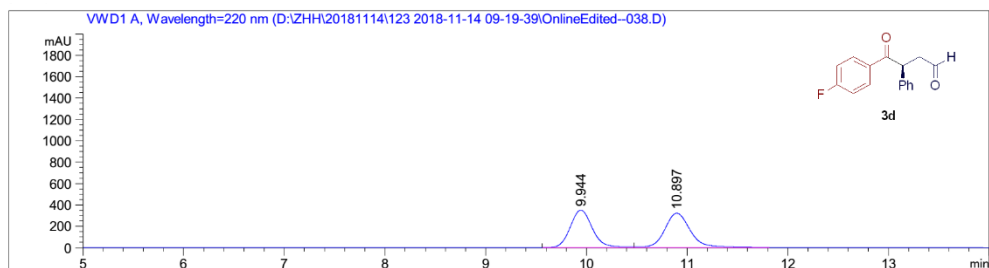

面积百分比报告

排序 : 信号  
 乘积因子 : 1.0000  
 稀释因子 : 1.0000  
 内标中不使用乘积因子和稀释因子

信号 1: VWD1 A, Wavelength=220 nm

| 峰 # | 保留时间 [min] | 类型 | 峰宽 [min] | 峰面积 [mAU*s] | 峰高 [mAU]  | 峰面积 %   |
|-----|------------|----|----------|-------------|-----------|---------|
| 1   | 9.944      | VV | 0.2376   | 5370.98584  | 350.77914 | 48.4408 |
| 2   | 10.897     | VB | 0.2720   | 5716.74902  | 322.15158 | 51.5592 |

总量 : 1.10877e4 672.93073

\*\*\* 报告结束 \*\*\*

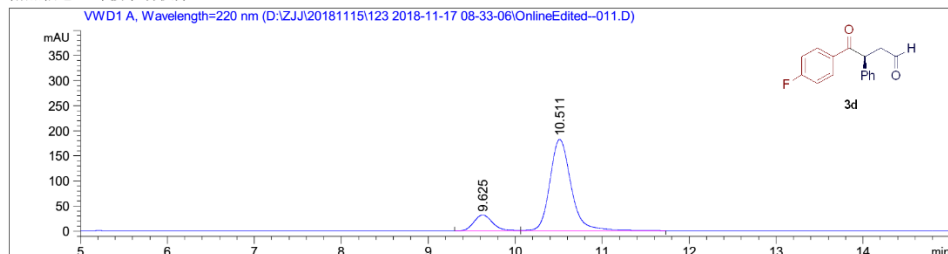

面积百分比报告

排序 : 信号  
 乘积因子 : 1.0000  
 稀释因子 : 1.0000  
 内标中不使用乘积因子和稀释因子

信号 1: VWD1 A, Wavelength=220 nm

| 峰 # | 保留时间 [min] | 类型 | 峰宽 [min] | 峰面积 [mAU*s] | 峰高 [mAU]  | 峰面积 %   |
|-----|------------|----|----------|-------------|-----------|---------|
| 1   | 9.625      | BV | 0.2327   | 477.81854   | 31.72096  | 13.4006 |
| 2   | 10.511     | VB | 0.2607   | 3087.82007  | 182.19090 | 86.5994 |

总量 : 3565.63861 213.91187

\*\*\* 报告结束 \*\*\*

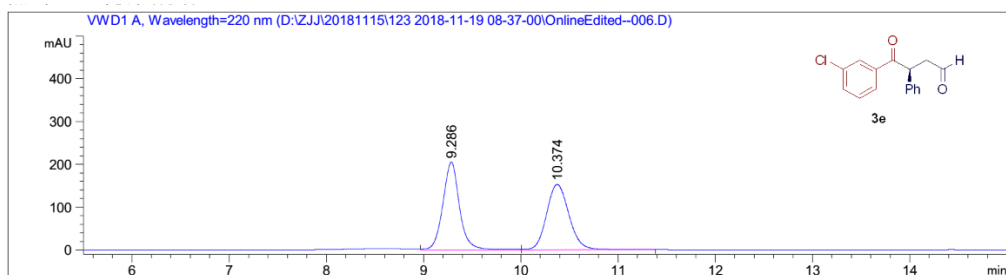

面积百分比报告

排序 : 信号  
 乘积因子 : 1.0000  
 稀释因子 : 1.0000  
 内标中不使用乘积因子和稀释因子

信号 1: VWD1 A, Wavelength=220 nm

| 峰 # | 保留时间 [min] | 类型 | 峰宽 [min] | 峰面积 [mAU*s] | 峰高 [mAU]  | 峰面积 %   |
|-----|------------|----|----------|-------------|-----------|---------|
| 1   | 9.286      | VV | 0.1792   | 2441.29517  | 204.60977 | 50.0130 |
| 2   | 10.374     | VB | 0.2499   | 2440.02783  | 152.28035 | 49.9870 |

总量 : 4881.32300 356.89012

\*\*\* 报告结束 \*\*\*

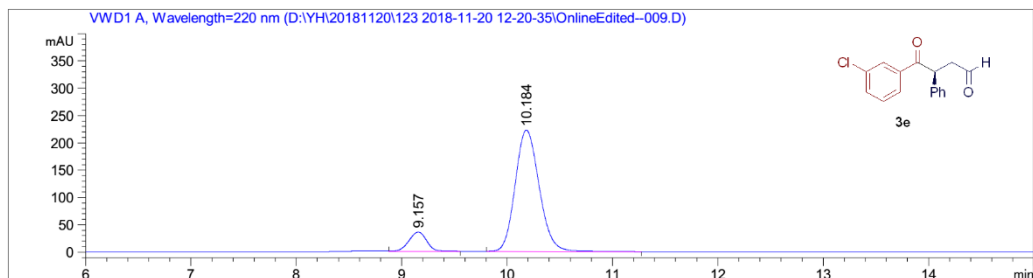

面积百分比报告

排序 : 信号  
 乘积因子 : 1.0000  
 稀释因子 : 1.0000  
 内标中不使用乘积因子和稀释因子

信号 1: VWD1 A, Wavelength=220 nm

| 峰 # | 保留时间 [min] | 类型 | 峰宽 [min] | 峰面积 [mAU*s] | 峰高 [mAU]  | 峰面积 %   |
|-----|------------|----|----------|-------------|-----------|---------|
| 1   | 9.157      | VB | 0.1870   | 417.76932   | 35.31725  | 10.6609 |
| 2   | 10.184     | BB | 0.2460   | 3500.95313  | 221.97729 | 89.3391 |

总量 : 3918.72244 257.29454

\*\*\* 报告结束 \*\*\*

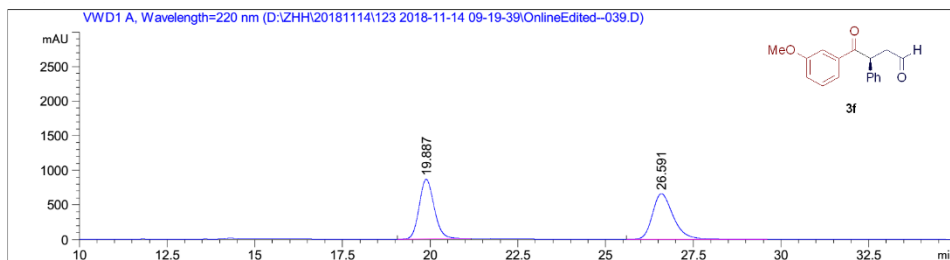

面积百分比报告

排序 : 信号  
 乘积因子 : 1.0000  
 稀释因子 : 1.0000  
 内标中不使用乘积因子和稀释因子

信号 1: VWD1 A, Wavelength=220 nm

| 峰 # | 保留时间 [min] | 类型 | 峰宽 [min] | 峰面积 [mAU*s] | 峰高 [mAU]  | 峰面积 %   |
|-----|------------|----|----------|-------------|-----------|---------|
| 1   | 19.887     | VB | 0.4576   | 2.56340e4   | 862.81165 | 48.6113 |
| 2   | 26.591     | BB | 0.6253   | 2.70986e4   | 659.60938 | 51.3887 |

总量 : 5.27327e4 1522.42102

\*\*\* 报告结束 \*\*\*

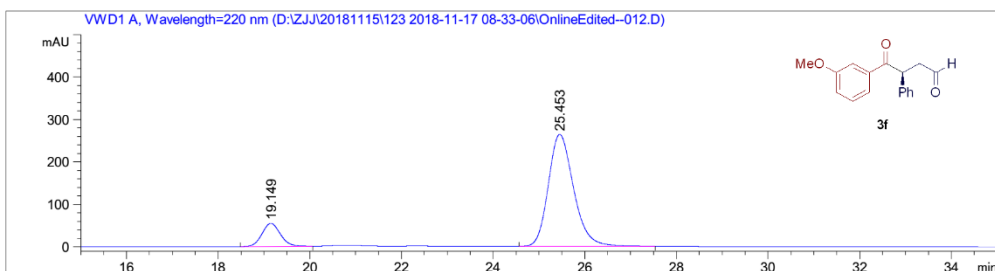

面积百分比报告

排序 : 信号  
 乘积因子 : 1.0000  
 稀释因子 : 1.0000  
 内标中不使用乘积因子和稀释因子

信号 1: VWD1 A, Wavelength=220 nm

| 峰 # | 保留时间 [min] | 类型 | 峰宽 [min] | 峰面积 [mAU*s] | 峰高 [mAU]  | 峰面积 %   |
|-----|------------|----|----------|-------------|-----------|---------|
| 1   | 19.149     | BB | 0.4366   | 1523.85132  | 54.27430  | 13.1202 |
| 2   | 25.453     | BB | 0.5813   | 1.00907e4   | 263.78049 | 86.8798 |

总量 : 1.16146e4 318.05479

\*\*\* 报告结束 \*\*\*

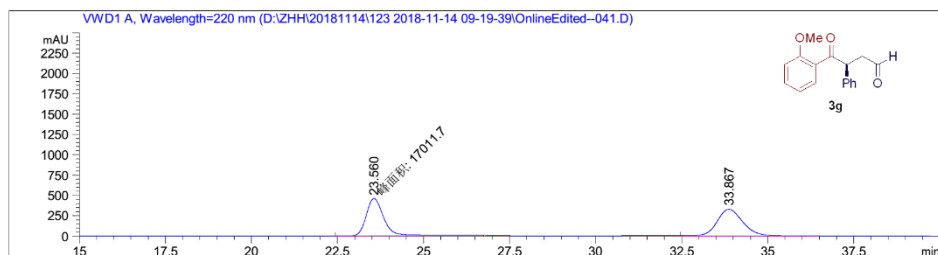

面积百分比报告

排序 : 信号  
 乘积因子 : 1.0000  
 稀释因子 : 1.0000  
 内标中不使用乘积因子和稀释因子

信号 1: VWD1 A, Wavelength=220 nm

| 峰 # | 保留时间 [min] | 类型 | 峰宽 [min] | 峰面积 [mAU*s] | 峰高 [mAU]  | 峰面积 %   |
|-----|------------|----|----------|-------------|-----------|---------|
| 1   | 23.560     | MM | 0.6166   | 1.70117e4   | 459.82669 | 49.7384 |
| 2   | 33.867     | VB | 0.7971   | 1.71906e4   | 328.75296 | 50.2616 |

总量 : 3.42023e4 788.57965

\*\*\* 报告结束 \*\*\*

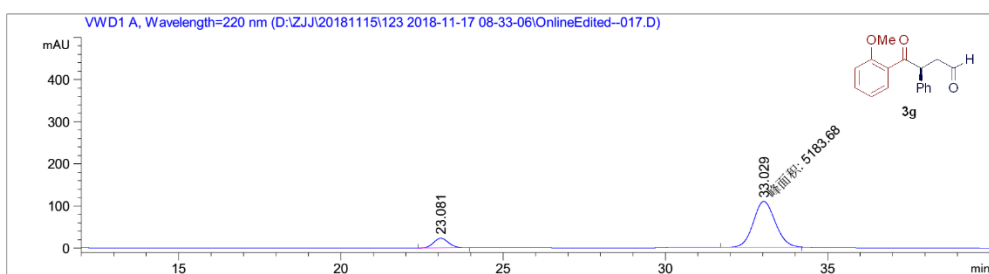

面积百分比报告

排序 : 信号  
 乘积因子 : 1.0000  
 稀释因子 : 1.0000  
 内标中不使用乘积因子和稀释因子

信号 1: VWD1 A, Wavelength=220 nm

| 峰 # | 保留时间 [min] | 类型 | 峰宽 [min] | 峰面积 [mAU*s] | 峰高 [mAU]  | 峰面积 %   |
|-----|------------|----|----------|-------------|-----------|---------|
| 1   | 23.081     | BB | 0.4761   | 723.33148   | 22.79909  | 12.2453 |
| 2   | 33.029     | MF | 0.7907   | 5183.68018  | 109.26099 | 87.7547 |

总量 : 5907.01166 132.06009

\*\*\* 报告结束 \*\*\*

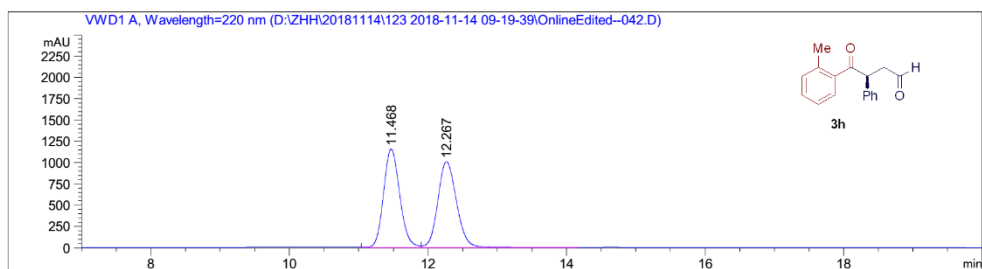

面积百分比报告

排序 : 信号  
 乘积因子 : 1.0000  
 稀释因子 : 1.0000  
 内标中不使用乘积因子和稀释因子

信号 1: VWD1 A, Wavelength=220 nm

| 峰 # | 保留时间 [min] | 类型 | 峰宽 [min] | 峰面积 [mAU*s] | 峰高 [mAU]   | 峰面积 %   |
|-----|------------|----|----------|-------------|------------|---------|
| 1   | 11.468     | VV | 0.2528   | 1.88340e4   | 1157.95447 | 49.7457 |
| 2   | 12.267     | VB | 0.2936   | 1.90265e4   | 1010.65546 | 50.2543 |

总量 : 3.78605e4 2168.60992

\*\*\* 报告结束 \*\*\*

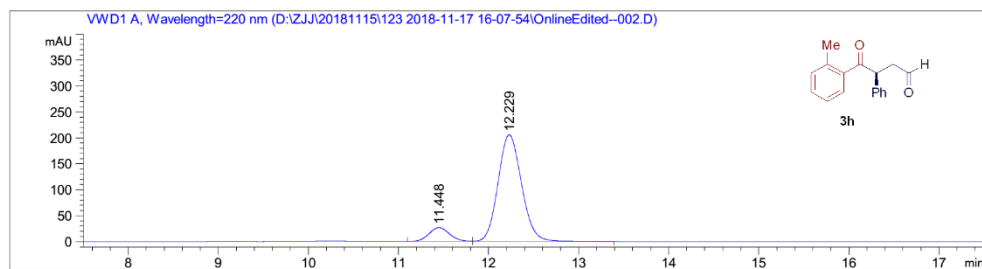

面积百分比报告

排序 : 信号  
 乘积因子 : 1.0000  
 稀释因子 : 1.0000  
 内标中不使用乘积因子和稀释因子

信号 1: VWD1 A, Wavelength=220 nm

| 峰 # | 保留时间 [min] | 类型 | 峰宽 [min] | 峰面积 [mAU*s] | 峰高 [mAU]  | 峰面积 %   |
|-----|------------|----|----------|-------------|-----------|---------|
| 1   | 11.448     | BV | 0.2495   | 423.63541   | 26.50046  | 10.1792 |
| 2   | 12.229     | VB | 0.2842   | 3738.12012  | 205.47368 | 89.8208 |

总量 : 4161.75552 231.97414

\*\*\* 报告结束 \*\*\*

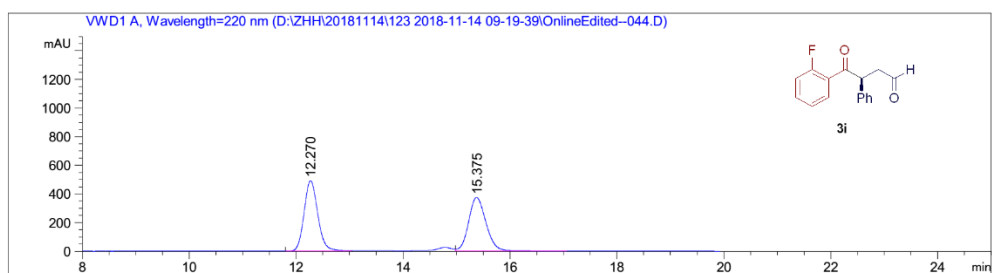

面积百分比报告

排序 : 信号  
 乘积因子 : 1.0000  
 稀释因子 : 1.0000  
 内标中不使用乘积因子和稀释因子

信号 1: VWD1 A, Wavelength=220 nm

| 峰 # | 保留时间 [min] | 类型 | 峰宽 [min] | 峰面积 [mAU*s] | 峰高 [mAU]  | 峰面积 %   |
|-----|------------|----|----------|-------------|-----------|---------|
| 1   | 12.270     | BV | 0.2757   | 8811.41992  | 492.49893 | 50.8321 |
| 2   | 15.375     | VB | 0.3523   | 8522.92578  | 374.84131 | 49.1679 |

总量 : 1.73343e4 867.34024

\*\*\* 报告结束 \*\*\*

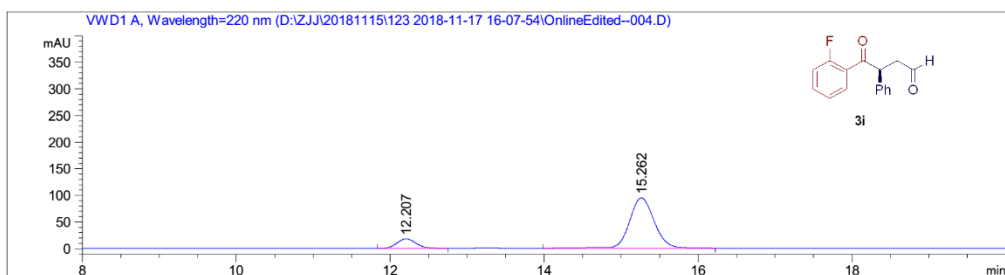

面积百分比报告

排序 : 信号  
 乘积因子 : 1.0000  
 稀释因子 : 1.0000  
 内标中不使用乘积因子和稀释因子

信号 1: VWD1 A, Wavelength=220 nm

| 峰 # | 保留时间 [min] | 类型 | 峰宽 [min] | 峰面积 [mAU*s] | 峰高 [mAU] | 峰面积 %   |
|-----|------------|----|----------|-------------|----------|---------|
| 1   | 12.207     | BB | 0.2713   | 313.14178   | 17.97318 | 12.8720 |
| 2   | 15.262     | BB | 0.3454   | 2119.59961  | 94.60391 | 87.1280 |

总量 : 2432.74139 112.57709

\*\*\* 报告结束 \*\*\*



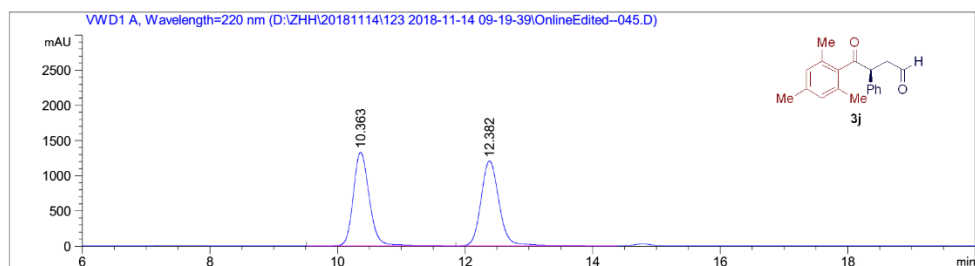

面积百分比报告

排序 : 信号  
乘积因子 : 1.0000  
稀释因子 : 1.0000  
内标中不使用乘积因子和稀释因子

信号 1: VWD1 A, Wavelength=220 nm

| 峰 # | 保留时间 [min] | 类型 | 峰宽 [min] | 峰面积 [mAU*s] | 峰高 [mAU]   | 峰面积 %   |
|-----|------------|----|----------|-------------|------------|---------|
| 1   | 10.363     | VV | 0.2685   | 2.30678e4   | 1328.99316 | 49.2711 |
| 2   | 12.382     | VB | 0.3027   | 2.37503e4   | 1206.53027 | 50.7289 |

总量 : 4.68181e4 2535.52344

\*\*\* 报告结束 \*\*\*

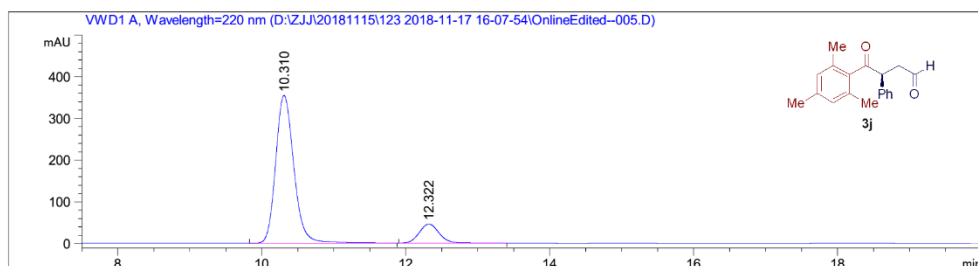

面积百分比报告

排序 : 信号  
乘积因子 : 1.0000  
稀释因子 : 1.0000  
内标中不使用乘积因子和稀释因子

信号 1: VWD1 A, Wavelength=220 nm

| 峰 # | 保留时间 [min] | 类型 | 峰宽 [min] | 峰面积 [mAU*s] | 峰高 [mAU]  | 峰面积 %   |
|-----|------------|----|----------|-------------|-----------|---------|
| 1   | 10.310     | BB | 0.2751   | 6265.92188  | 354.73795 | 87.3451 |
| 2   | 12.322     | BB | 0.3037   | 907.83307   | 46.10472  | 12.6549 |

总量 : 7173.75494 400.84266

\*\*\* 报告结束 \*\*\*

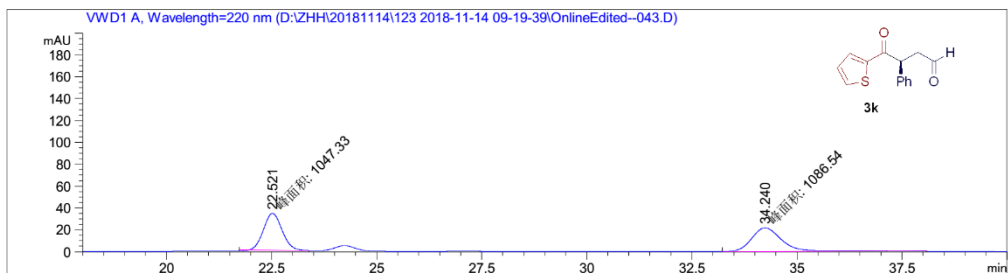

面积百分比报告

排序 : 信号  
 乘积因子 : 1.0000  
 稀释因子 : 1.0000  
 内标中不使用乘积因子和稀释因子

信号 1: VWD1 A, Wavelength=220 nm

| 峰 # | 保留时间 [min] | 类型 | 峰宽 [min] | 峰面积 [mAU*s] | 峰高 [mAU] | 峰面积 %   |
|-----|------------|----|----------|-------------|----------|---------|
| 1   | 22.521     | MM | 0.5162   | 1047.33325  | 33.81378 | 49.0814 |
| 2   | 34.240     | MM | 0.8372   | 1086.53735  | 21.63116 | 50.9186 |

总量 : 2133.87061 55.44494

\*\*\* 报告结束 \*\*\*

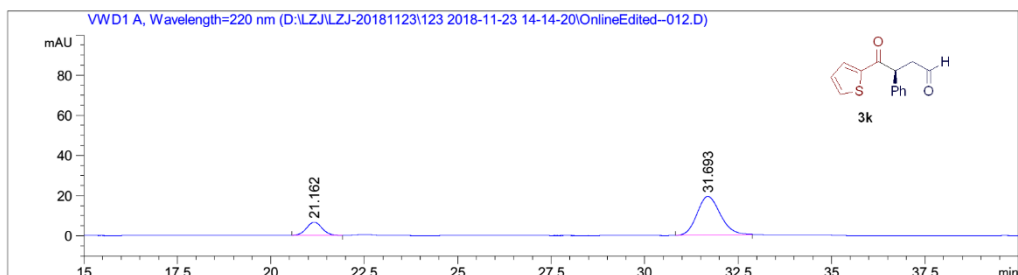

面积百分比报告

排序 : 信号  
 乘积因子 : 1.0000  
 稀释因子 : 1.0000  
 内标中不使用乘积因子和稀释因子

信号 1: VWD1 A, Wavelength=220 nm

| 峰 # | 保留时间 [min] | 类型 | 峰宽 [min] | 峰面积 [mAU*s] | 峰高 [mAU] | 峰面积 %   |
|-----|------------|----|----------|-------------|----------|---------|
| 1   | 21.162     | BB | 0.3928   | 190.36230   | 6.59403  | 18.6020 |
| 2   | 31.693     | BB | 0.6243   | 832.98029   | 19.23265 | 81.3980 |

总量 : 1023.34259 25.82668

\*\*\* 报告结束 \*\*\*

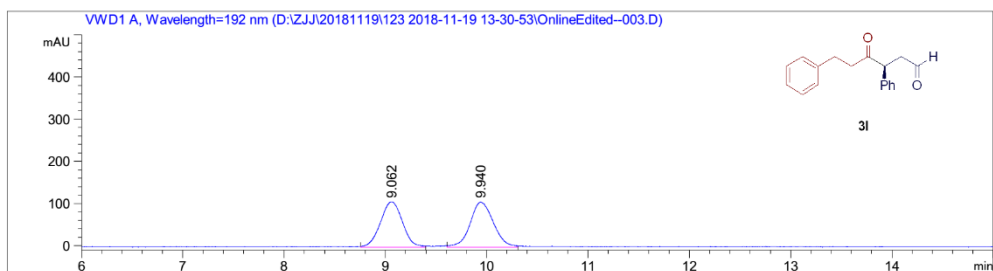

面积百分比报告

排序 : 信号  
 乘积因子 : 1.0000  
 稀释因子 : 1.0000  
 内标中不使用乘积因子和稀释因子

信号 1: VWD1 A, Wavelength=192 nm

| 峰 # | 保留时间 [min] | 类型 | 峰宽 [min] | 峰面积 [mAU*s] | 峰高 [mAU]  | 峰面积 %   |
|-----|------------|----|----------|-------------|-----------|---------|
| 1   | 9.062      | VV | 0.1882   | 1616.15564  | 107.01091 | 48.7342 |
| 2   | 9.940      | VV | 0.1983   | 1700.11230  | 106.45448 | 51.2658 |

总量 : 3316.26794 213.46539

\*\*\* 报告结束 \*\*\*

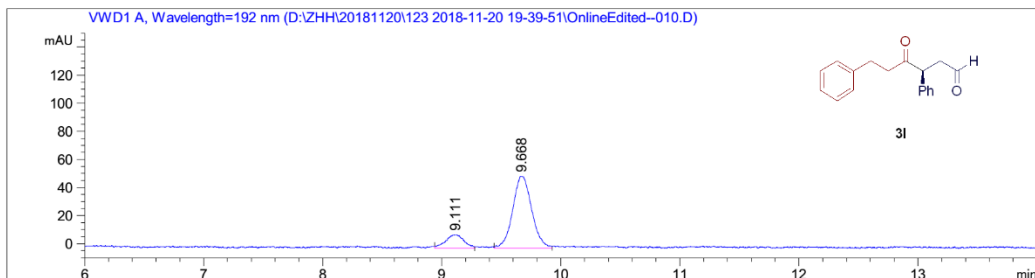

面积百分比报告

排序 : 信号  
 乘积因子 : 1.0000  
 稀释因子 : 1.0000  
 内标中不使用乘积因子和稀释因子

信号 1: VWD1 A, Wavelength=192 nm

| 峰 # | 保留时间 [min] | 类型 | 峰宽 [min] | 峰面积 [mAU*s] | 峰高 [mAU] | 峰面积 %   |
|-----|------------|----|----------|-------------|----------|---------|
| 1   | 9.111      | VV | 0.1281   | 103.87579   | 9.69115  | 15.3940 |
| 2   | 9.668      | VV | 0.1370   | 570.90344   | 51.21814 | 84.6060 |

总量 : 674.77924 60.90929

\*\*\* 报告结束 \*\*\*

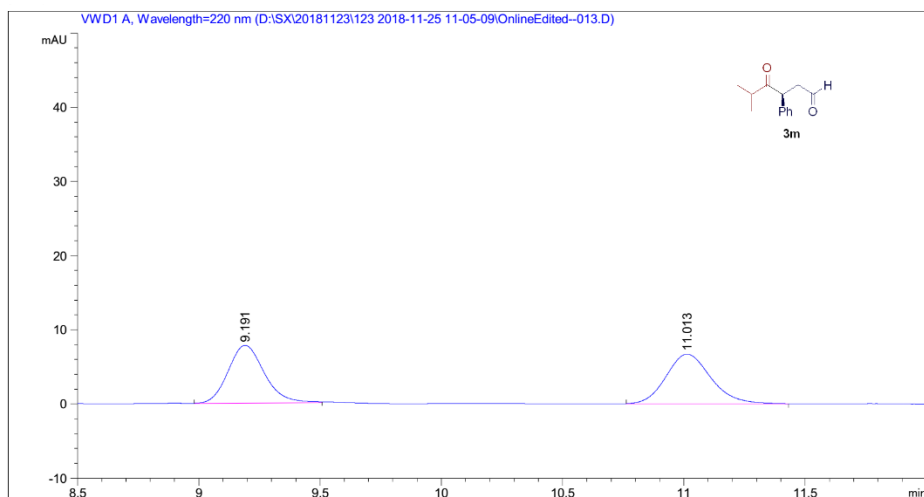

面积百分比报告

排序 : 信号  
 乘积因子 : 1.0000  
 稀释因子 : 1.0000  
 内标使用乘积因子和稀释因子

信号 1: VWD1 A, Wavelength=220 nm

| 峰 # | 保留时间 [min] | 类型 | 峰宽 [min] | 峰面积 [mAU*s] | 峰高 [mAU] | 峰面积 %   |
|-----|------------|----|----------|-------------|----------|---------|
| 1   | 9.191      | BB | 0.1603   | 80.97955    | 7.78597  | 48.3766 |
| 2   | 11.013     | BB | 0.1966   | 86.41460    | 6.69563  | 51.6234 |

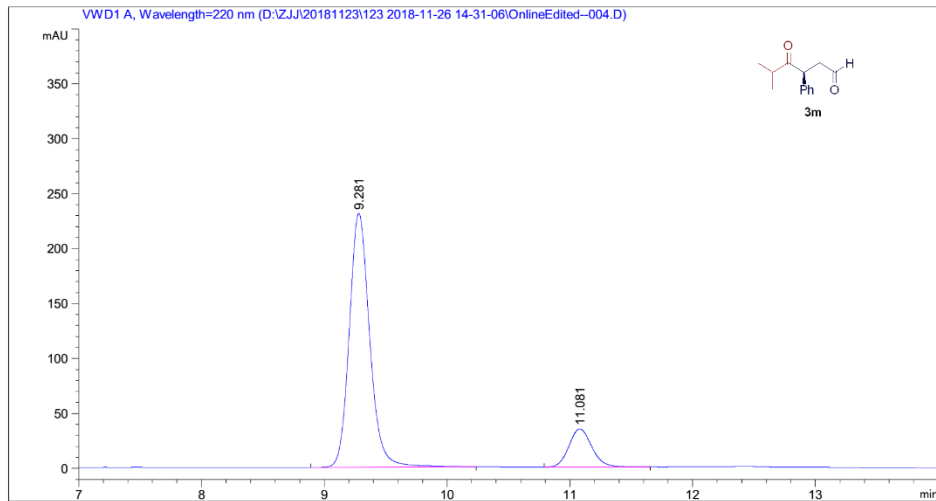

面积百分比报告

排序 : 信号  
 乘积因子 : 1.0000  
 稀释因子 : 1.0000  
 内标使用乘积因子和稀释因子

信号 1: VWD1 A, Wavelength=220 nm

| 峰 # | 保留时间 [min] | 类型 | 峰宽 [min] | 峰面积 [mAU*s] | 峰高 [mAU]  | 峰面积 %   |
|-----|------------|----|----------|-------------|-----------|---------|
| 1   | 9.281      | BB | 0.1773   | 2683.26318  | 231.31868 | 85.5935 |
| 2   | 11.081     | BB | 0.2016   | 451.62793   | 34.76586  | 14.4065 |

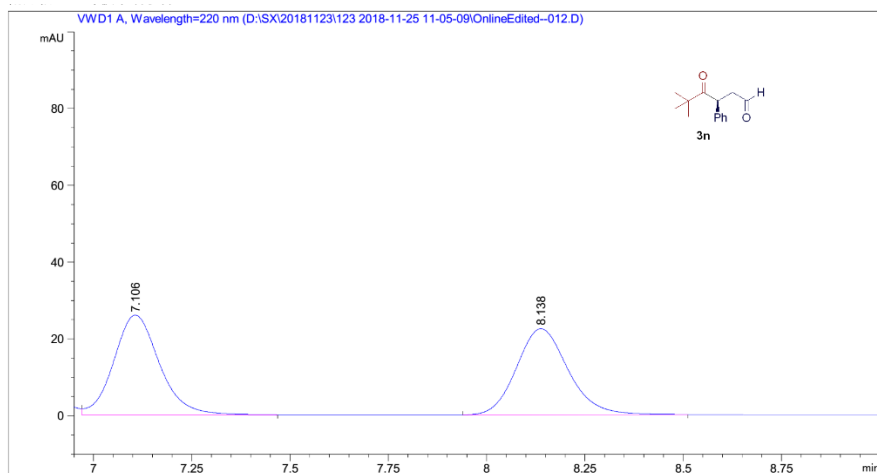

面积百分比报告

排序 : 信号  
 乘积因子 : 1.0000  
 稀释因子 : 1.0000  
 内标使用乘积因子和稀释因子

信号 1: VWD1 A, Wavelength=220 nm

| 峰 # | 保留时间 [min] | 类型 | 峰宽 [min] | 峰面积 [mAU*s] | 峰高 [mAU] | 峰面积 %   |
|-----|------------|----|----------|-------------|----------|---------|
| 1   | 7.106      | VB | 0.1237   | 211.32396   | 26.04159 | 50.6822 |
| 2   | 8.138      | BB | 0.1409   | 205.63533   | 22.44261 | 49.3178 |

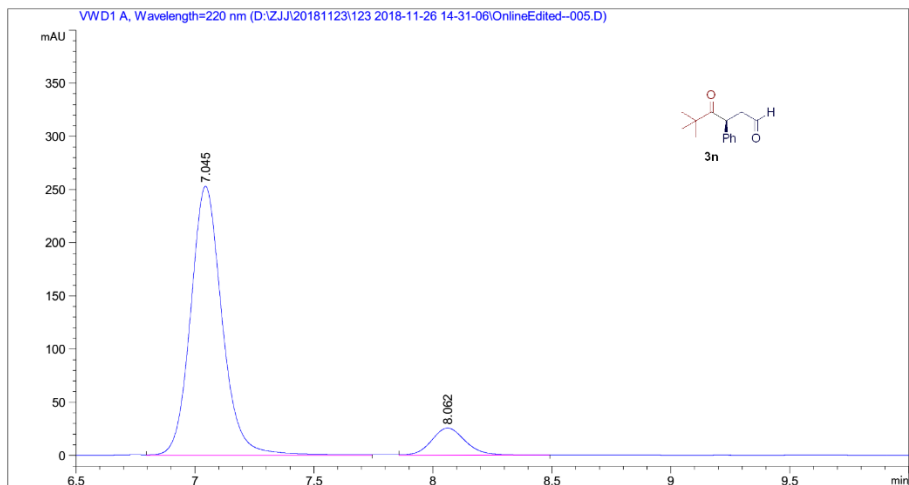

面积百分比报告

排序 : 信号  
 乘积因子 : 1.0000  
 稀释因子 : 1.0000  
 内标使用乘积因子和稀释因子

信号 1: VWD1 A, Wavelength=220 nm

| 峰 # | 保留时间 [min] | 类型 | 峰宽 [min] | 峰面积 [mAU*s] | 峰高 [mAU]  | 峰面积 %   |
|-----|------------|----|----------|-------------|-----------|---------|
| 1   | 7.045      | VB | 0.1402   | 2325.55078  | 252.99445 | 90.1513 |
| 2   | 8.062      | BB | 0.1531   | 254.05759   | 25.53905  | 9.8487  |

总量 : 2579.60837 278.53349

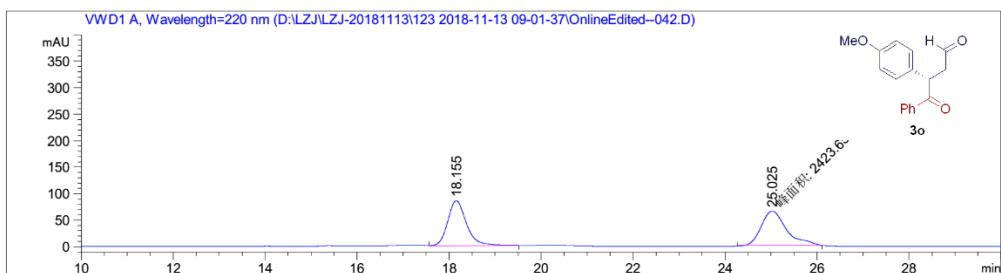

面积百分比报告

排序 : 信号  
 乘积因子 : 1.0000  
 稀释因子 : 1.0000  
 内标中不使用乘积因子和稀释因子

信号 1: VWD1 A, Wavelength=220 nm

| 峰 # | 保留时间 [min] | 类型 | 峰宽 [min] | 峰面积 [mAU*s] | 峰高 [mAU] | 峰面积 %   |
|-----|------------|----|----------|-------------|----------|---------|
| 1   | 18.155     | VB | 0.4287   | 2394.78003  | 84.99420 | 49.7004 |
| 2   | 25.025     | MM | 0.6263   | 2423.64990  | 64.49909 | 50.2996 |

总量 : 4818.42993 149.49329

\*\*\* 报告结束 \*\*\*

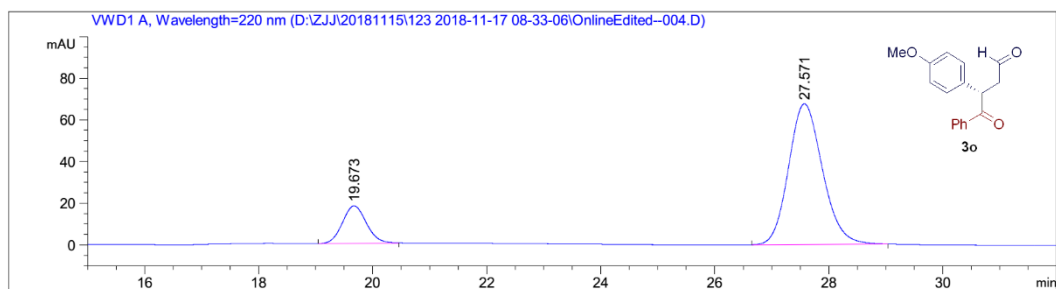

面积百分比报告

排序 : 信号  
 乘积因子 : 1.0000  
 稀释因子 : 1.0000  
 内标中不使用乘积因子和稀释因子

信号 1: VWD1 A, Wavelength=220 nm

| 峰 # | 保留时间 [min] | 类型 | 峰宽 [min] | 峰面积 [mAU*s] | 峰高 [mAU] | 峰面积 %   |
|-----|------------|----|----------|-------------|----------|---------|
| 1   | 19.673     | BB | 0.4463   | 524.18146   | 17.97072 | 15.7977 |
| 2   | 27.571     | BB | 0.6404   | 2793.90991  | 67.56318 | 84.2023 |

总量 : 3318.09137 85.53390

\*\*\* 报告结束 \*\*\*

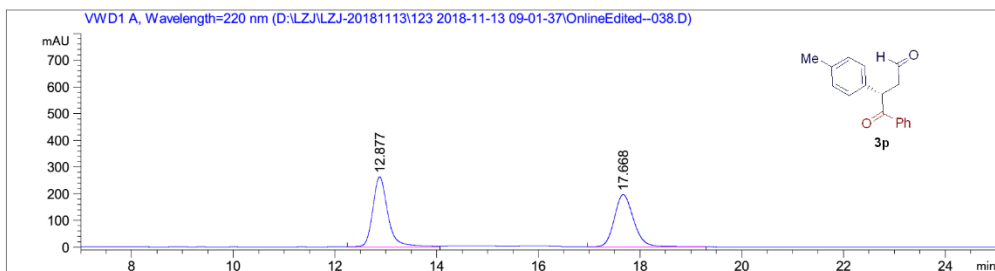

面积百分比报告

排序 : 信号  
 乘积因子 : 1.0000  
 稀释因子 : 1.0000  
 内标中不使用乘积因子和稀释因子

信号 1: VWD1 A, Wavelength=220 nm

| 峰 # | 保留时间 [min] | 类型 | 峰宽 [min] | 峰面积 [mAU*s] | 峰高 [mAU]  | 峰面积 %   |
|-----|------------|----|----------|-------------|-----------|---------|
| 1   | 12.877     | VB | 0.3170   | 5465.90234  | 262.44299 | 51.2968 |
| 2   | 17.668     | BB | 0.4079   | 5189.55273  | 195.99489 | 48.7032 |

总量 : 1.06555e4 458.43788

\*\*\* 报告结束 \*\*\*

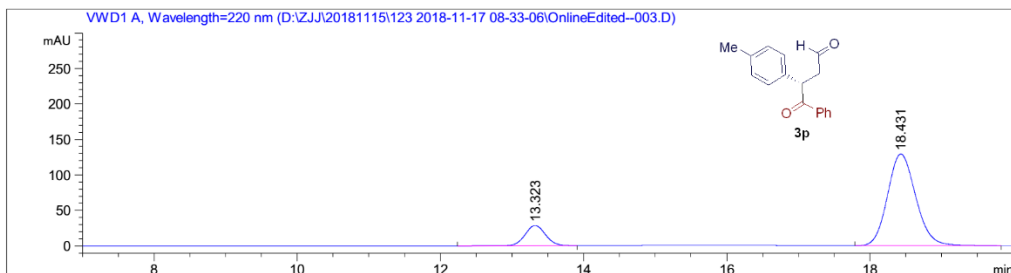

面积百分比报告

排序 : 信号  
 乘积因子 : 1.0000  
 稀释因子 : 1.0000  
 内标中不使用乘积因子和稀释因子

信号 1: VWD1 A, Wavelength=220 nm

| 峰 # | 保留时间 [min] | 类型 | 峰宽 [min] | 峰面积 [mAU*s] | 峰高 [mAU]  | 峰面积 %   |
|-----|------------|----|----------|-------------|-----------|---------|
| 1   | 13.323     | BB | 0.3161   | 584.35571   | 28.63651  | 14.1316 |
| 2   | 18.431     | BB | 0.4284   | 3550.74902  | 129.27928 | 85.8684 |

总量 : 4135.10474 157.91580

\*\*\* 报告结束 \*\*\*

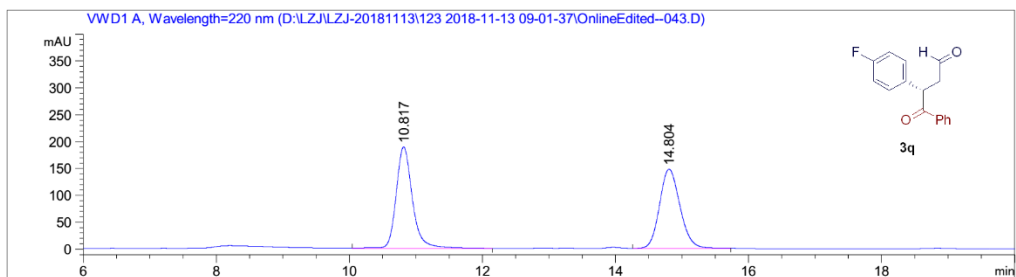

面积百分比报告

排序 : 信号  
 乘积因子 : 1.0000  
 稀释因子 : 1.0000  
 内标中不使用乘积因子和稀释因子

信号 1: VWD1 A, Wavelength=220 nm

| 峰 # | 保留时间 [min] | 类型 | 峰宽 [min] | 峰面积 [mAU*s] | 峰高 [mAU]  | 峰面积 %   |
|-----|------------|----|----------|-------------|-----------|---------|
| 1   | 10.817     | VB | 0.2606   | 3227.22998  | 188.67720 | 50.6460 |
| 2   | 14.804     | VB | 0.3290   | 3144.90771  | 147.36853 | 49.3540 |

总量 : 6372.13770 336.04573

\*\*\* 报告结束 \*\*\*

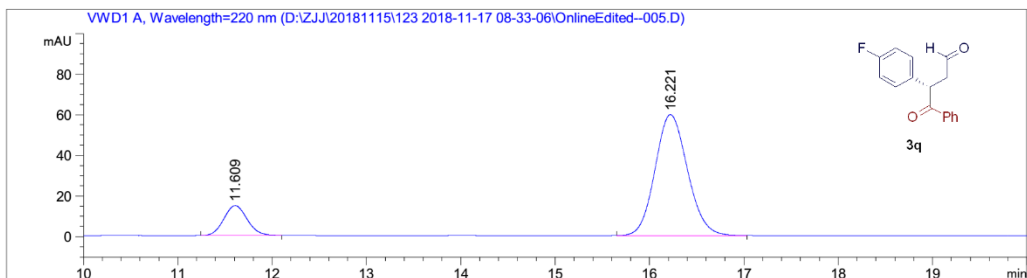

面积百分比报告

排序 : 信号  
 乘积因子 : 1.0000  
 稀释因子 : 1.0000  
 内标中不使用乘积因子和稀释因子

信号 1: VWD1 A, Wavelength=220 nm

| 峰 # | 保留时间 [min] | 类型 | 峰宽 [min] | 峰面积 [mAU*s] | 峰高 [mAU] | 峰面积 %   |
|-----|------------|----|----------|-------------|----------|---------|
| 1   | 11.609     | BB | 0.2674   | 252.55983   | 14.70080 | 15.0582 |
| 2   | 16.221     | BB | 0.3701   | 1424.66809  | 59.56138 | 84.9418 |

总量 : 1677.22792 74.26218

\*\*\* 报告结束 \*\*\*



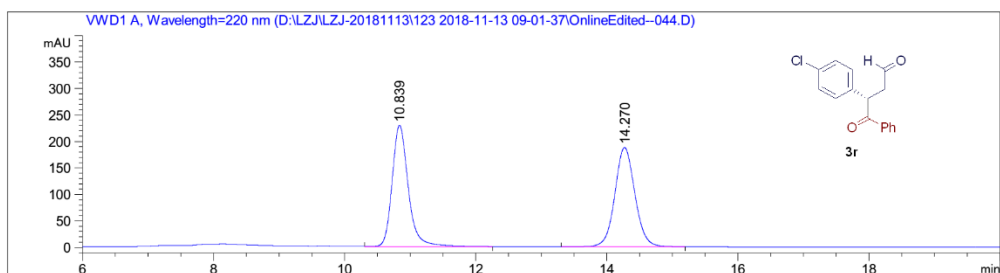

面积百分比报告

排序 : 信号  
 乘积因子 : 1.0000  
 稀释因子 : 1.0000  
 内标中不使用乘积因子和稀释因子

信号 1: VWD1 A, Wavelength=220 nm

| 峰 # | 保留时间 [min] | 类型 | 峰宽 [min] | 峰面积 [mAU*s] | 峰高 [mAU]  | 峰面积 %   |
|-----|------------|----|----------|-------------|-----------|---------|
| 1   | 10.839     | VB | 0.2622   | 3954.31177  | 229.32411 | 49.8020 |
| 2   | 14.270     | BB | 0.3273   | 3985.75781  | 187.29362 | 50.1980 |

总量 : 7940.06958 416.61774

\*\*\* 报告结束 \*\*\*

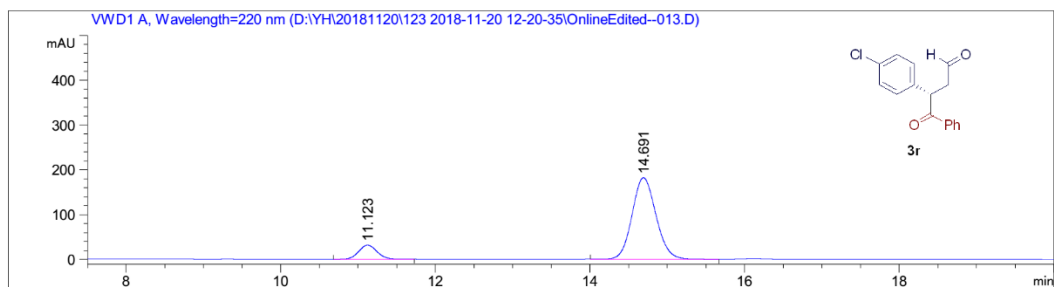

面积百分比报告

排序 : 信号  
 乘积因子 : 1.0000  
 稀释因子 : 1.0000  
 内标中不使用乘积因子和稀释因子

信号 1: VWD1 A, Wavelength=220 nm

| 峰 # | 保留时间 [min] | 类型 | 峰宽 [min] | 峰面积 [mAU*s] | 峰高 [mAU]  | 峰面积 %   |
|-----|------------|----|----------|-------------|-----------|---------|
| 1   | 11.123     | BB | 0.2563   | 521.82898   | 31.50201  | 11.7811 |
| 2   | 14.691     | BB | 0.3358   | 3907.53369  | 181.78241 | 88.2189 |

总量 : 4429.36267 213.28442

\*\*\* 报告结束 \*\*\*

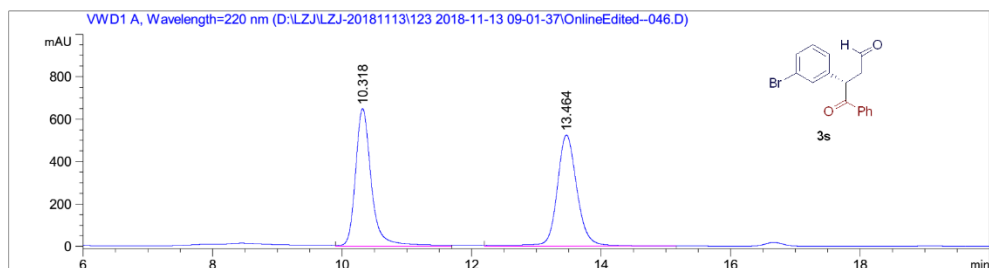

面积百分比报告

排序 : 信号  
 乘积因子 : 1.0000  
 稀释因子 : 1.0000  
 内标中不使用乘积因子和稀释因子

信号 1: VWD1 A, Wavelength=220 nm

| 峰 # | 保留时间 [min] | 类型 | 峰宽 [min] | 峰面积 [mAU*s] | 峰高 [mAU]  | 峰面积 %   |
|-----|------------|----|----------|-------------|-----------|---------|
| 1   | 10.318     | VB | 0.2596   | 1.10947e4   | 648.37738 | 49.7446 |
| 2   | 13.464     | VB | 0.3268   | 1.12087e4   | 523.50037 | 50.2554 |

总量 : 2.23034e4 1171.87775

\*\*\* 报告结束 \*\*\*

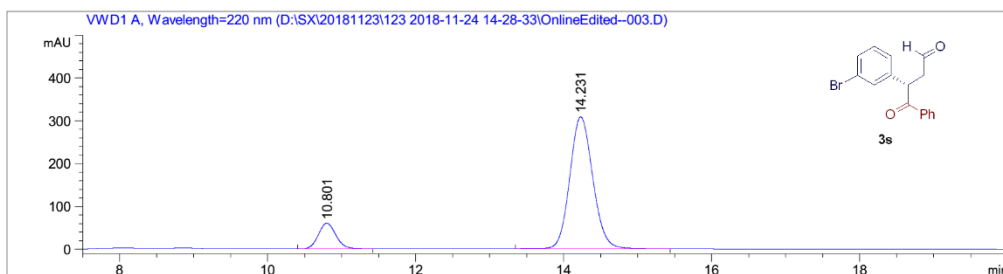

面积百分比报告

排序 : 信号  
 乘积因子 : 1.0000  
 稀释因子 : 1.0000  
 内标中不使用乘积因子和稀释因子

信号 1: VWD1 A, Wavelength=220 nm

| 峰 # | 保留时间 [min] | 类型 | 峰宽 [min] | 峰面积 [mAU*s] | 峰高 [mAU]  | 峰面积 %   |
|-----|------------|----|----------|-------------|-----------|---------|
| 1   | 10.801     | BB | 0.2557   | 982.13690   | 59.77727  | 12.8879 |
| 2   | 14.231     | BB | 0.3336   | 6638.45654  | 307.82010 | 87.1121 |

总量 : 7620.59344 367.59737

\*\*\* 报告结束 \*\*\*

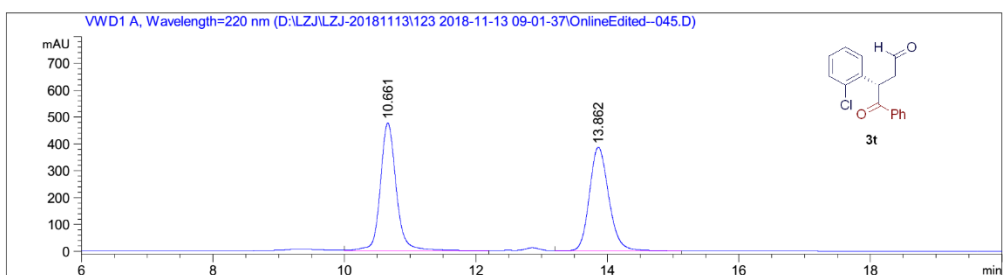

面积百分比报告

排序 : 信号  
乘积因子 : 1.0000  
稀释因子 : 1.0000  
内标中不使用乘积因子和稀释因子

信号 1: VWD1 A, Wavelength=220 nm

| 峰 # | 保留时间 [min] | 类型 | 峰宽 [min] | 峰面积 [mAU*s] | 峰高 [mAU]  | 峰面积 %   |
|-----|------------|----|----------|-------------|-----------|---------|
| 1   | 10.661     | VB | 0.2610   | 8178.63086  | 477.16788 | 50.5841 |
| 2   | 13.862     | VB | 0.3179   | 7989.73828  | 386.97763 | 49.4159 |

总量 : 1.61684e4 864.14551

\*\*\* 报告结束 \*\*\*

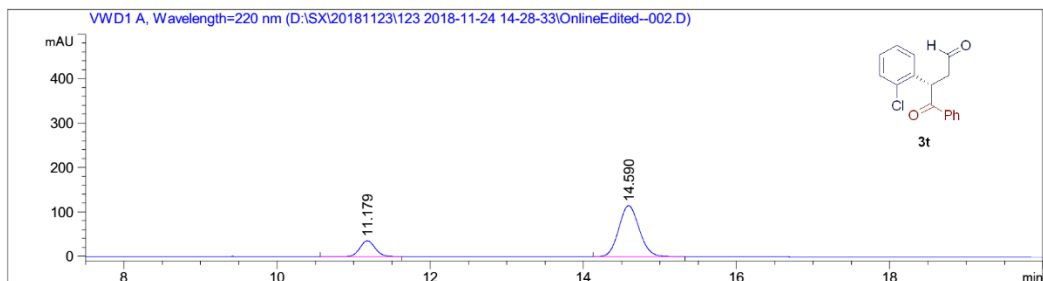

面积百分比报告

排序 : 信号  
乘积因子 : 1.0000  
稀释因子 : 1.0000  
内标中不使用乘积因子和稀释因子

信号 1: VWD1 A, Wavelength=220 nm

| 峰 # | 保留时间 [min] | 类型 | 峰宽 [min] | 峰面积 [mAU*s] | 峰高 [mAU]  | 峰面积 %   |
|-----|------------|----|----------|-------------|-----------|---------|
| 1   | 11.179     | BB | 0.2145   | 493.19757   | 35.62347  | 18.7776 |
| 2   | 14.590     | BB | 0.2887   | 2133.31641  | 114.84486 | 81.2224 |

总量 : 2626.51398 150.46834

\*\*\* 报告结束 \*\*\*

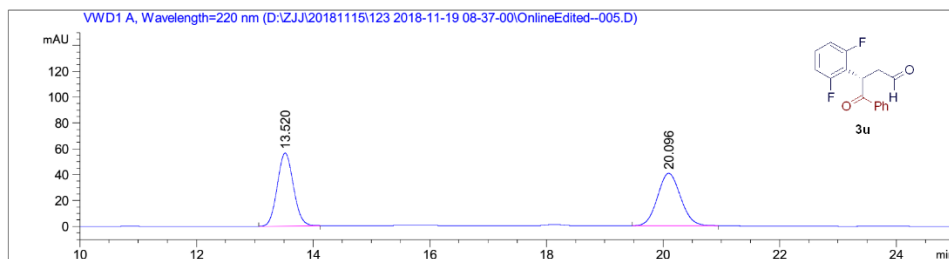

面积百分比报告

排序 : 信号  
 乘积因子 : 1.0000  
 稀释因子 : 1.0000  
 内标中不使用乘积因子和稀释因子

信号 1: VWD1 A, Wavelength=220 nm

| 峰 # | 保留时间 [min] | 类型 | 峰宽 [min] | 峰面积 [mAU*s] | 峰高 [mAU] | 峰面积 %   |
|-----|------------|----|----------|-------------|----------|---------|
| 1   | 13.520     | BB | 0.2998   | 1082.82825  | 56.43952 | 49.2784 |
| 2   | 20.096     | BB | 0.4255   | 1114.54089  | 40.56545 | 50.7216 |

总量 : 2197.36914 97.00497

\*\*\* 报告结束 \*\*\*

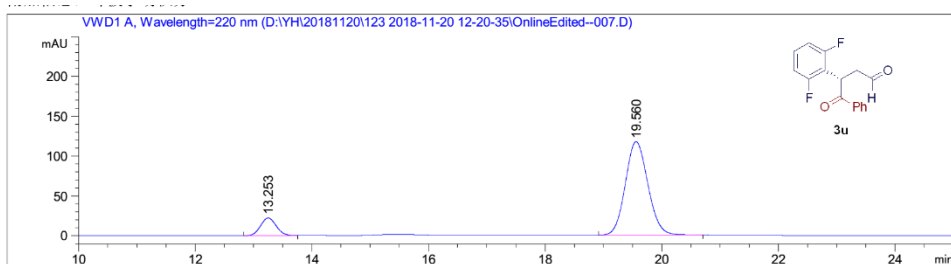

面积百分比报告

排序 : 信号  
 乘积因子 : 1.0000  
 稀释因子 : 1.0000  
 内标中不使用乘积因子和稀释因子

信号 1: VWD1 A, Wavelength=220 nm

| 峰 # | 保留时间 [min] | 类型 | 峰宽 [min] | 峰面积 [mAU*s] | 峰高 [mAU]  | 峰面积 %   |
|-----|------------|----|----------|-------------|-----------|---------|
| 1   | 13.253     | BB | 0.2952   | 419.58060   | 22.23423  | 11.7459 |
| 2   | 19.560     | BB | 0.4209   | 3152.57861  | 117.18459 | 88.2541 |

总量 : 3572.15921 139.41882

\*\*\* 报告结束 \*\*\*
